# Supplementary material for: OX40 expressed in endothelial cells facilitates tumor cells to escape from T-cell surveillance through S1P-YAP axis
Source: Research Square preprint supplement (doi:10.21203/rs.3.rs-4337435/v1), 2024-05-14

Figure S6A

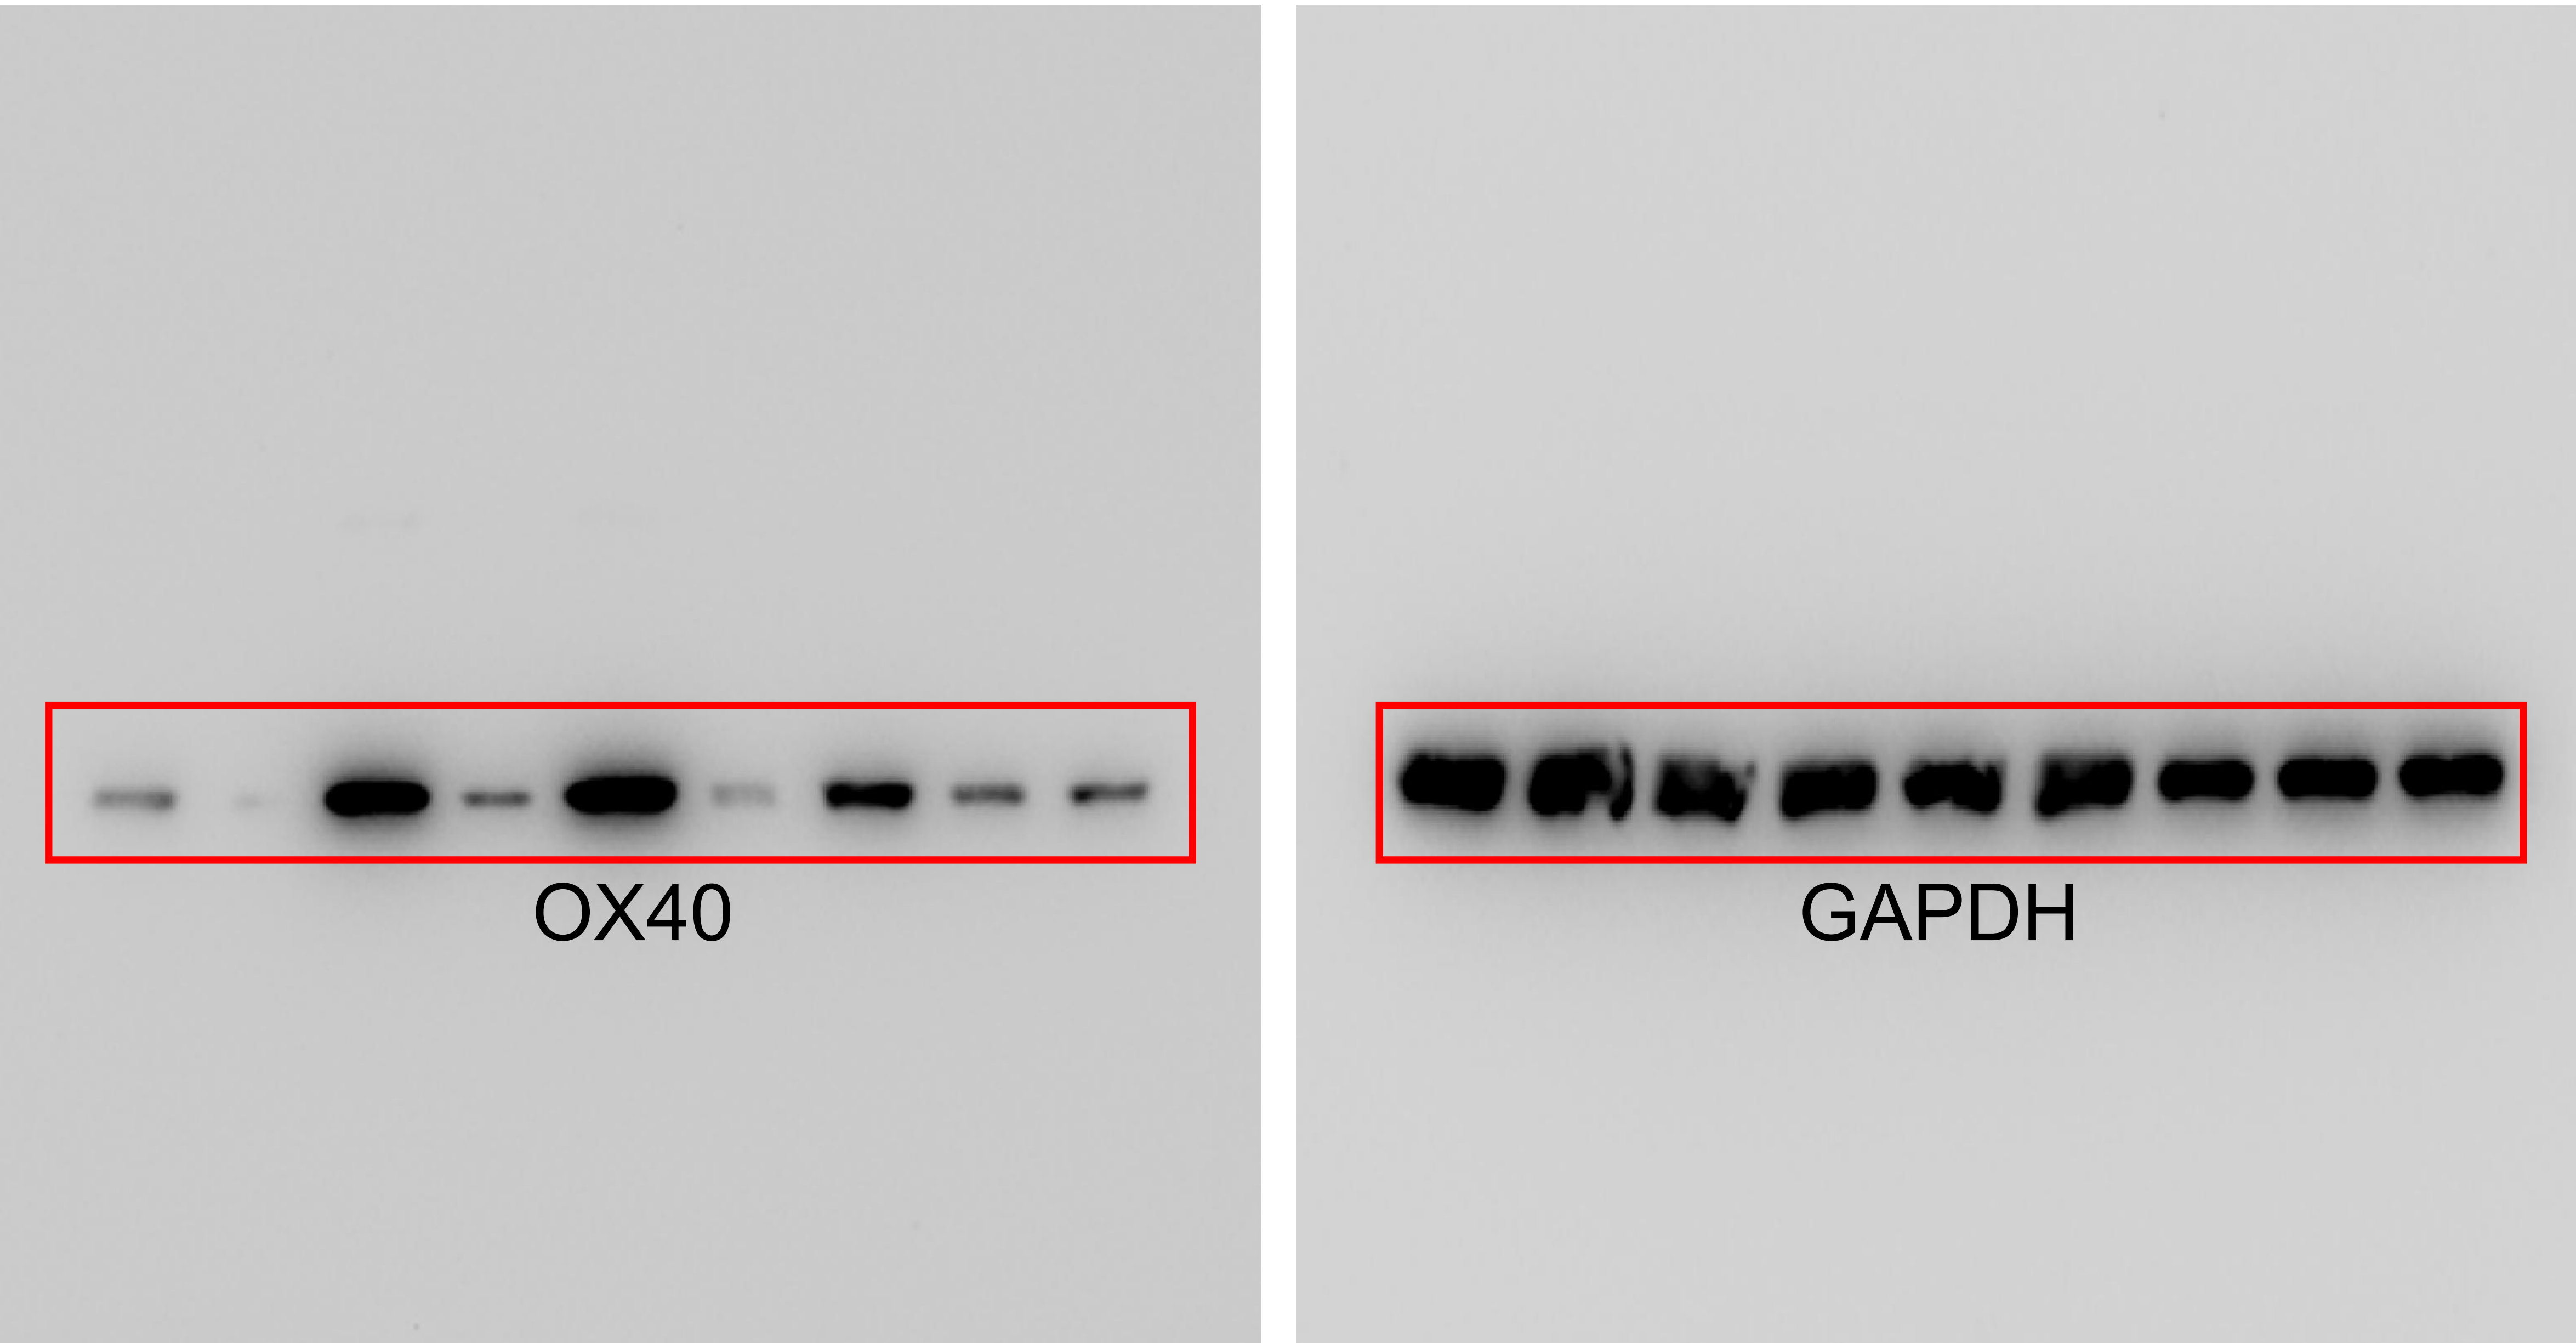

Figure S6A

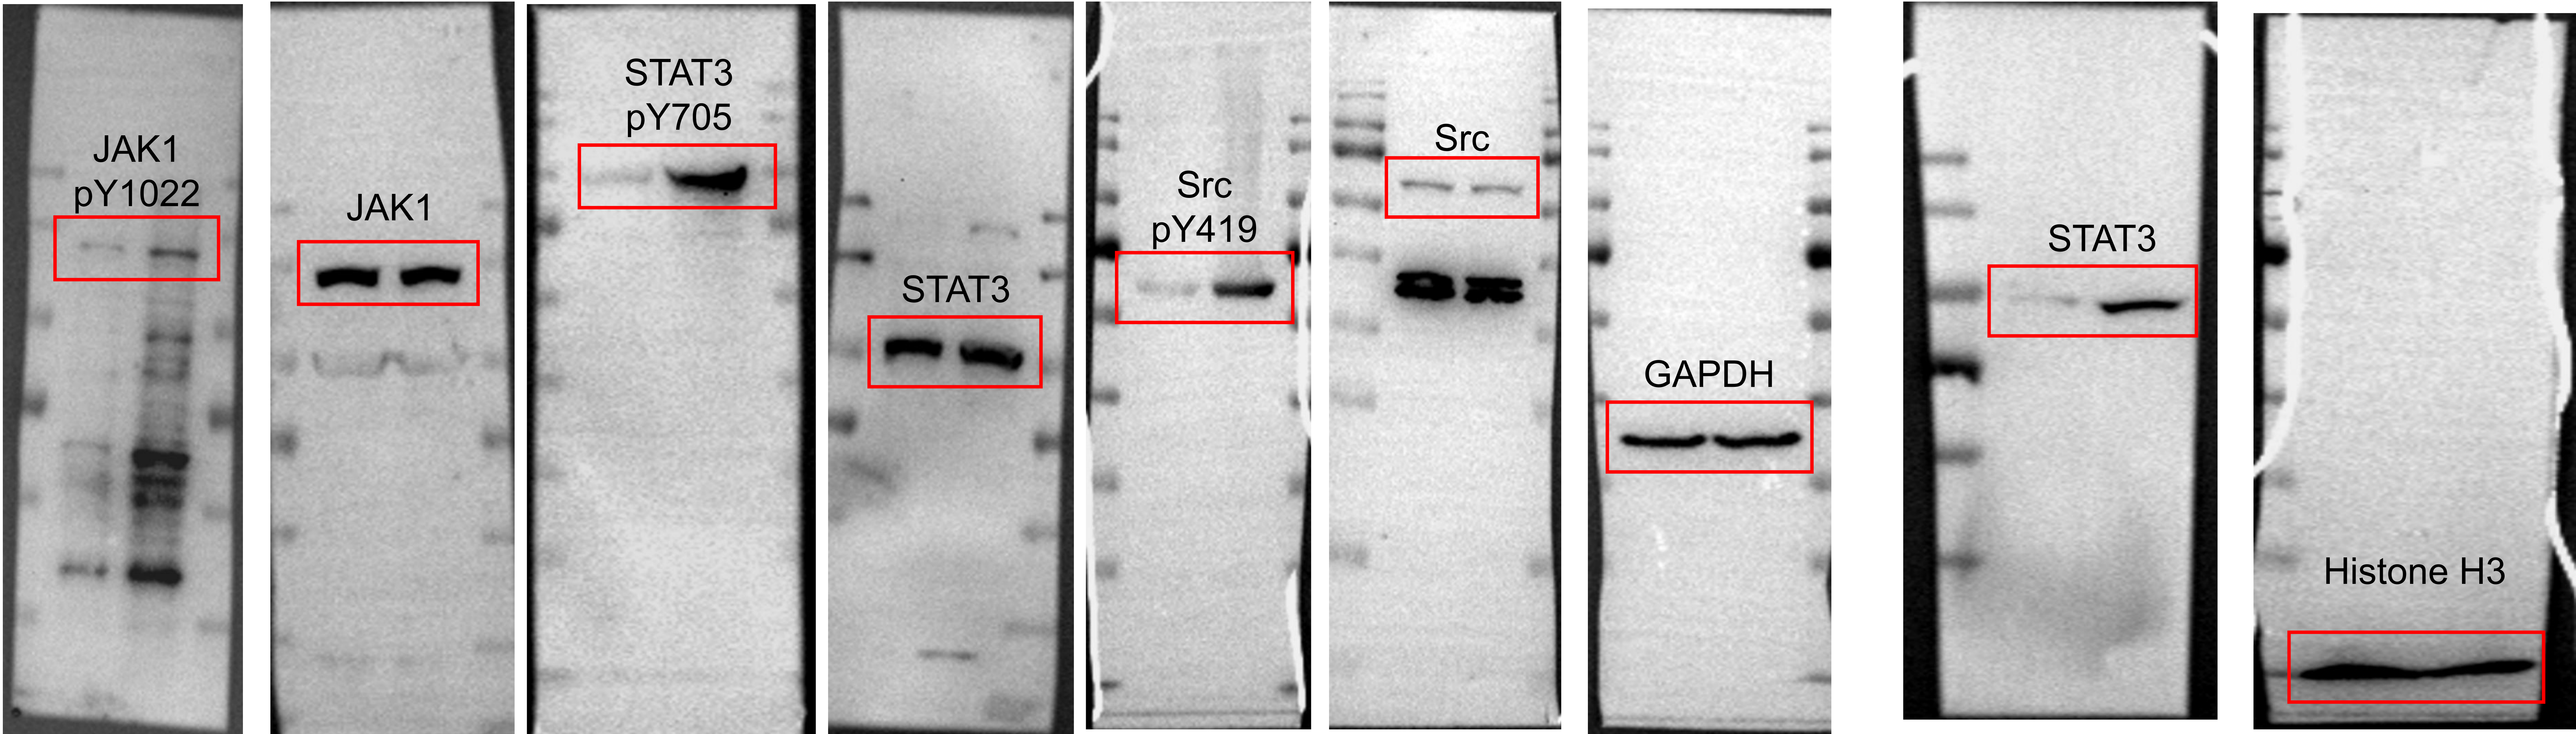

Figure S8A

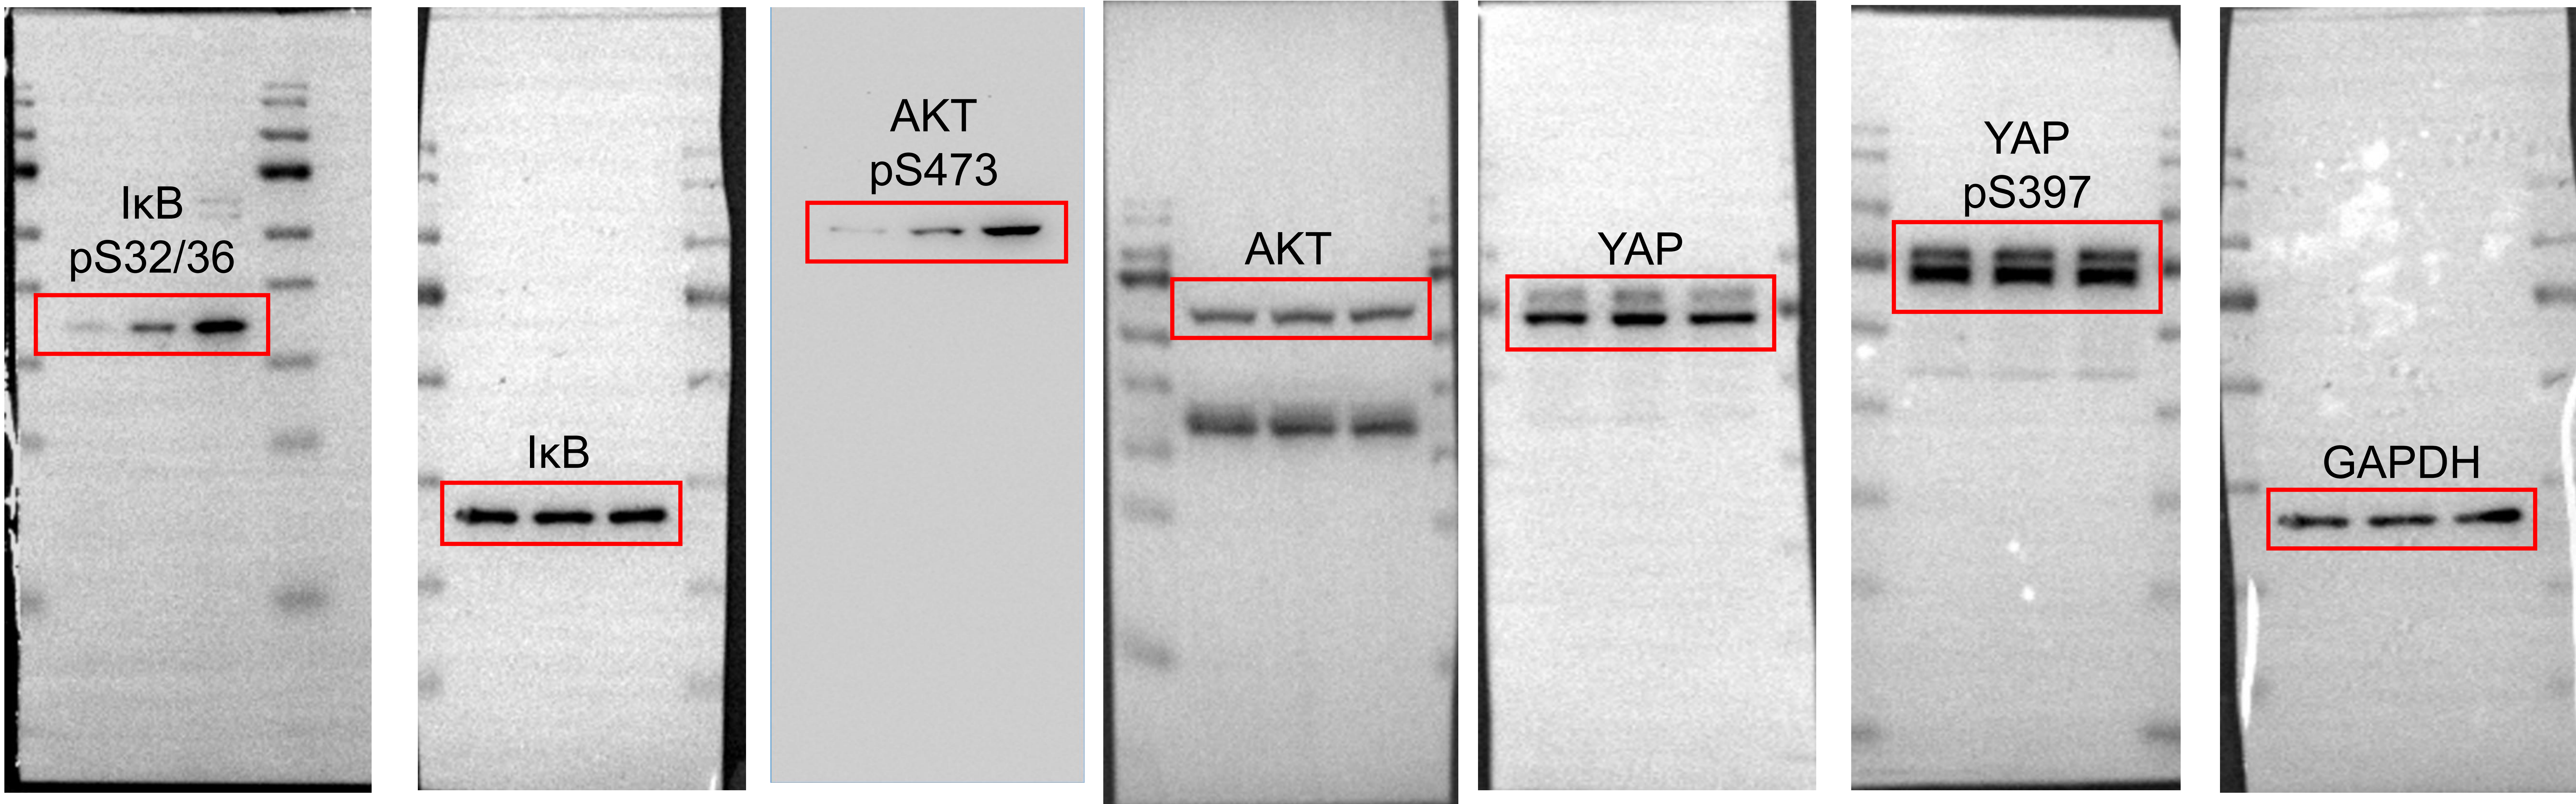



Figure S8B

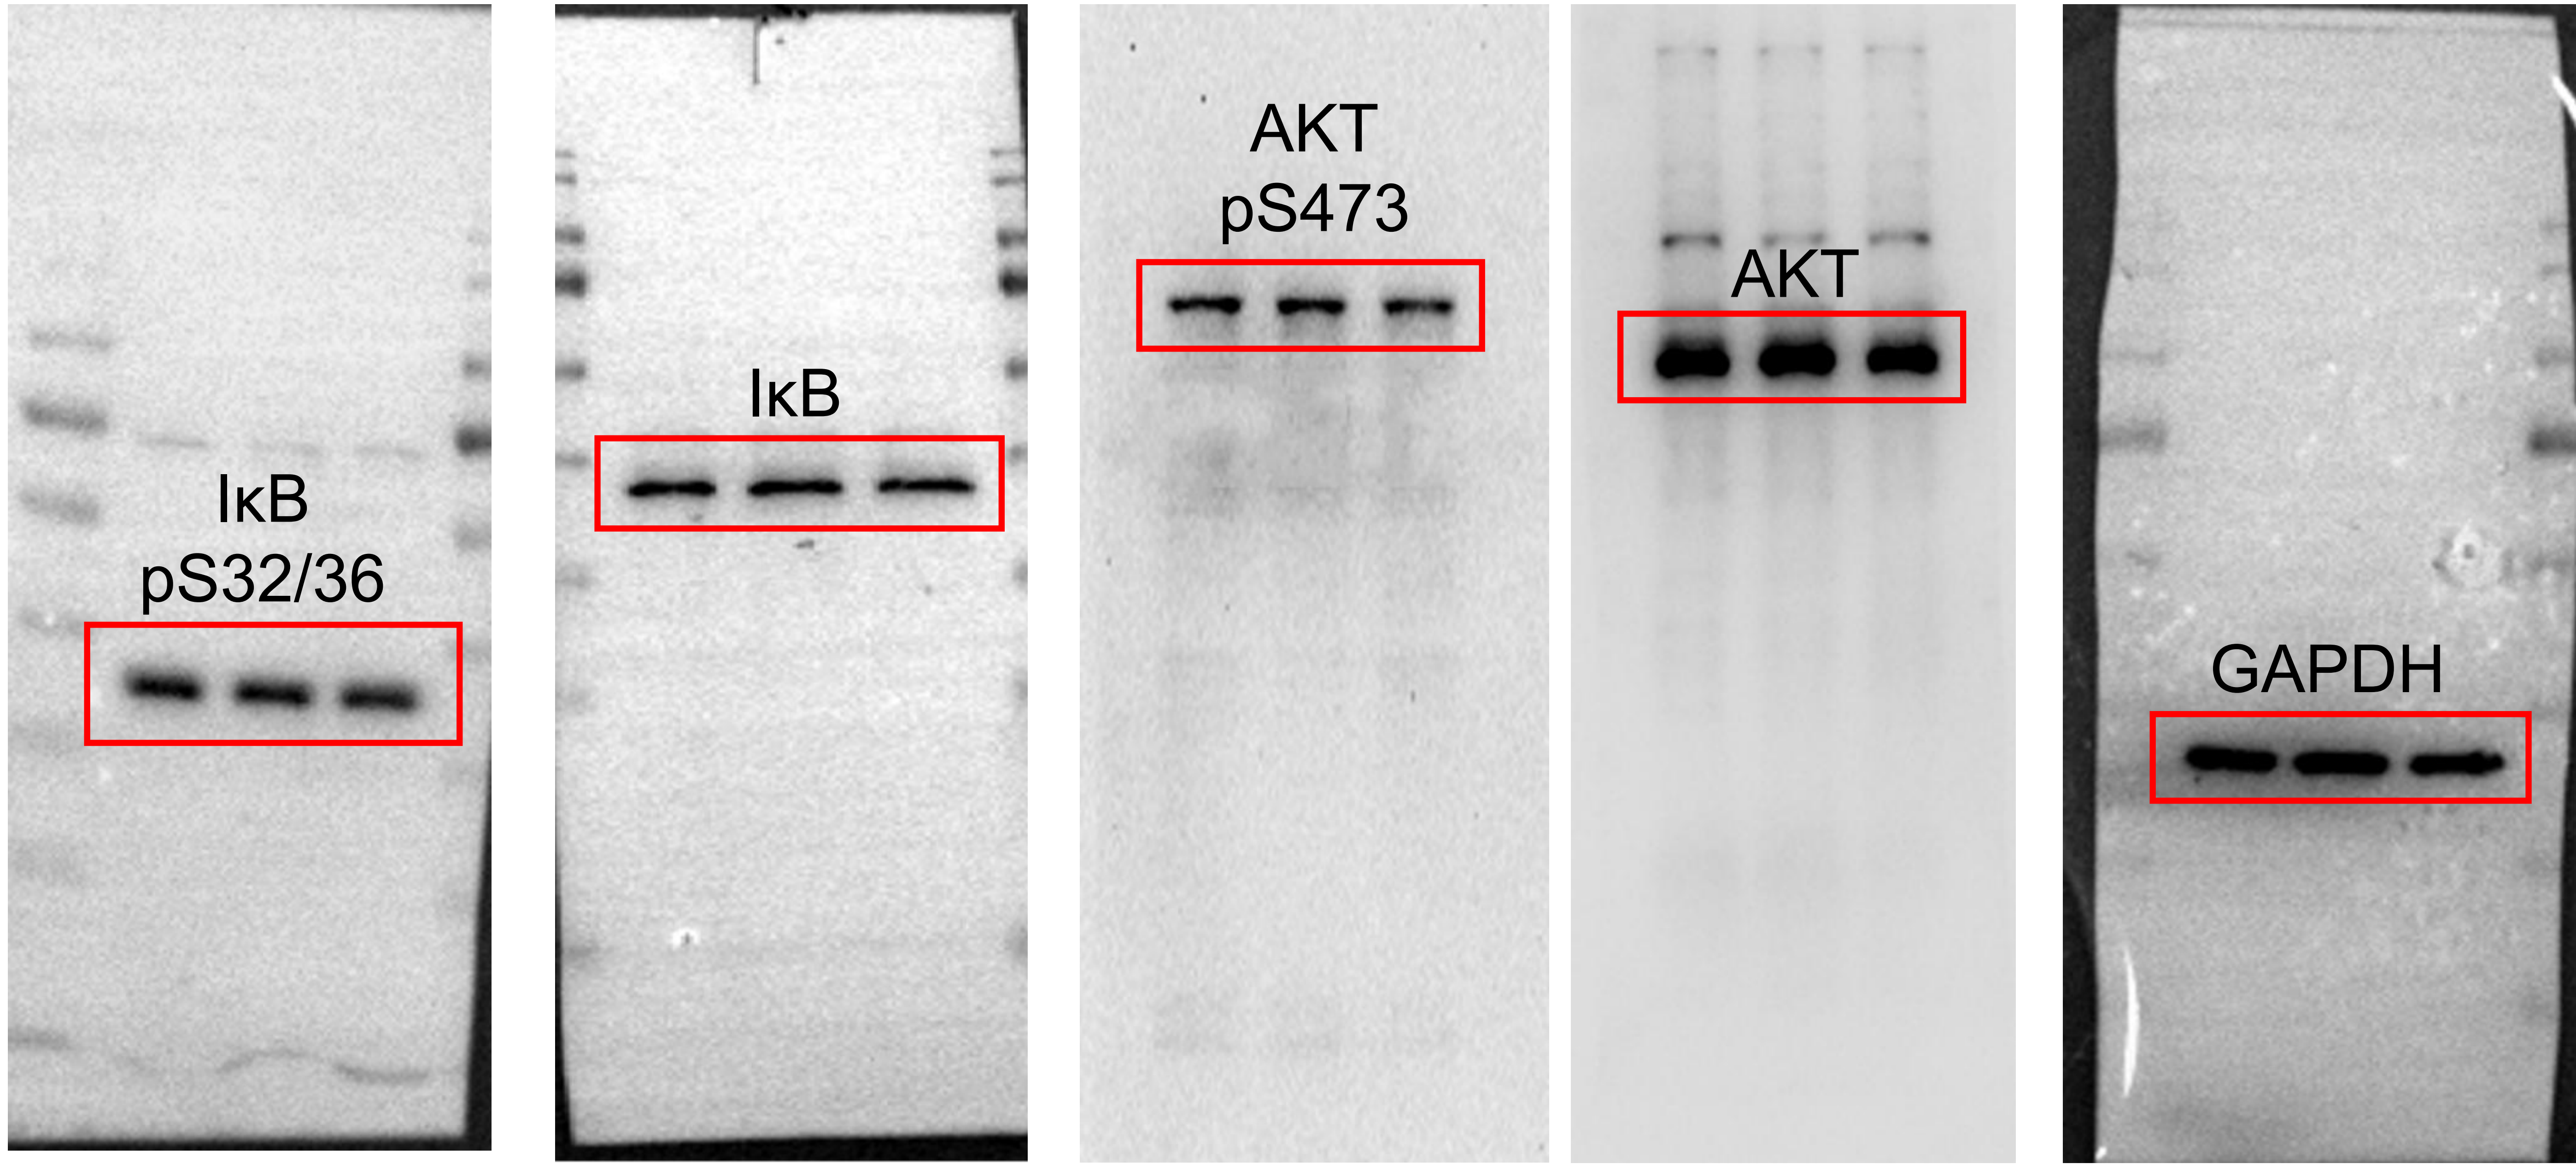

Figure S9B

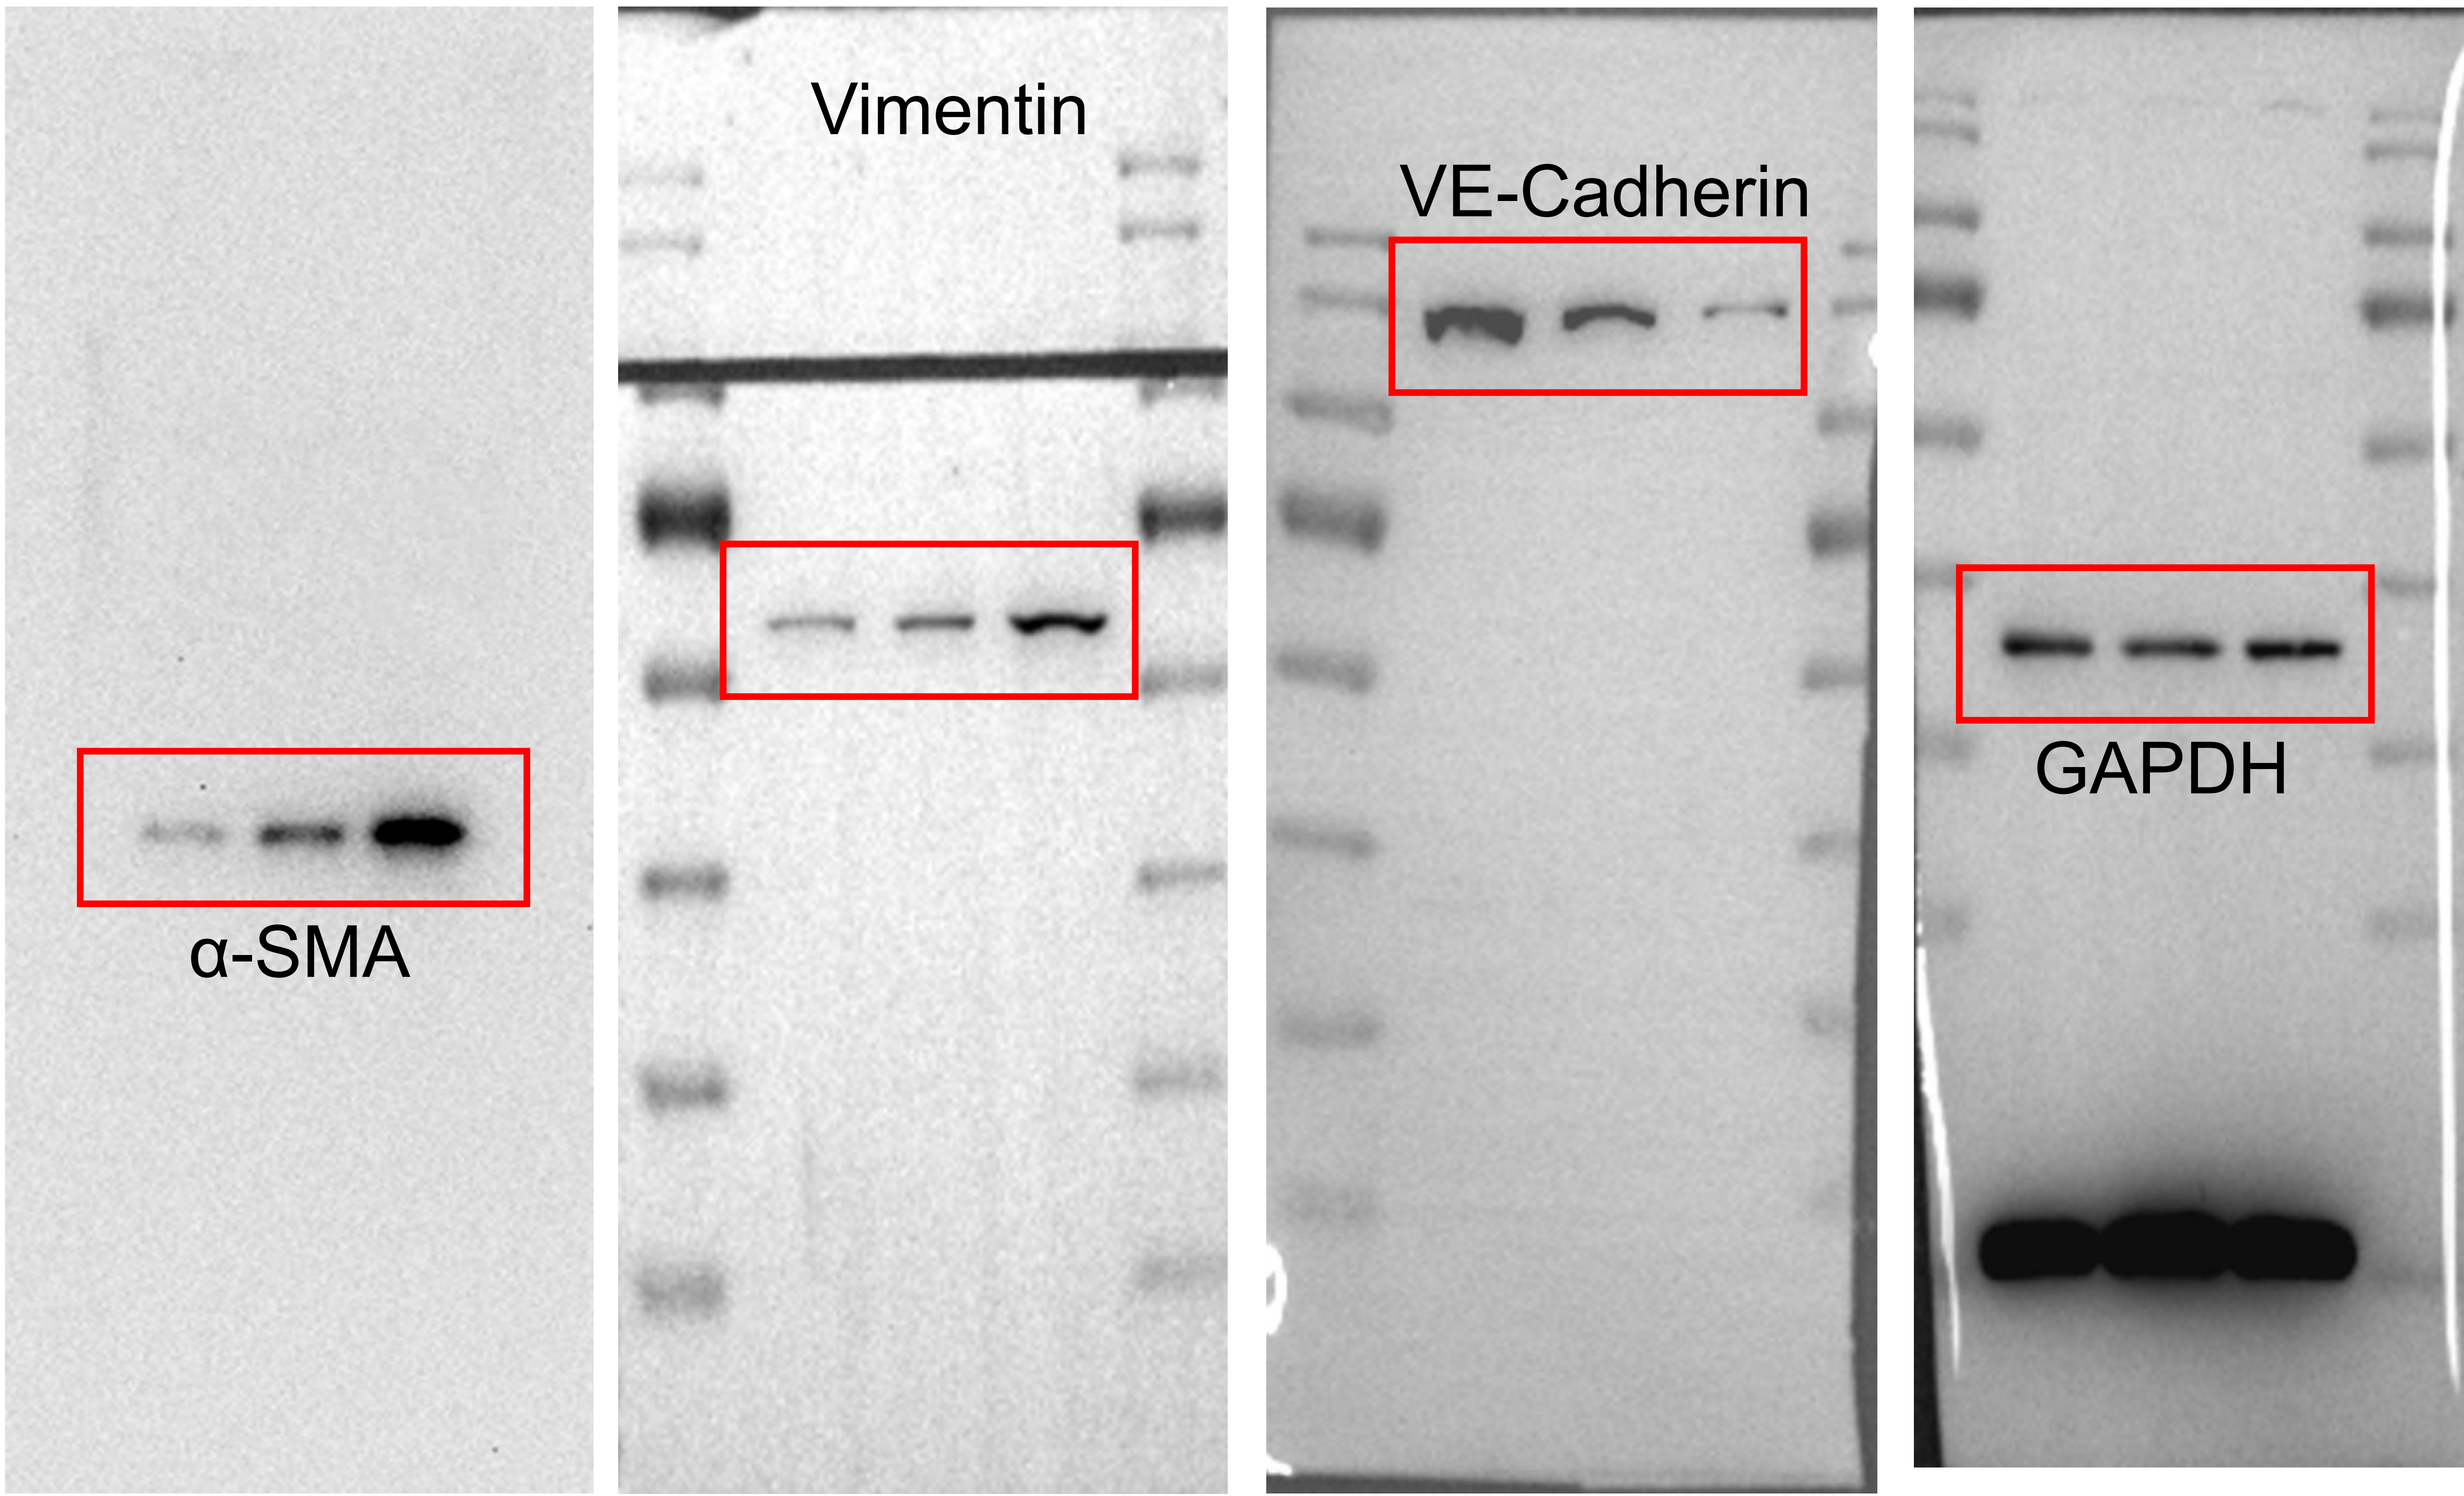

Figure S10A

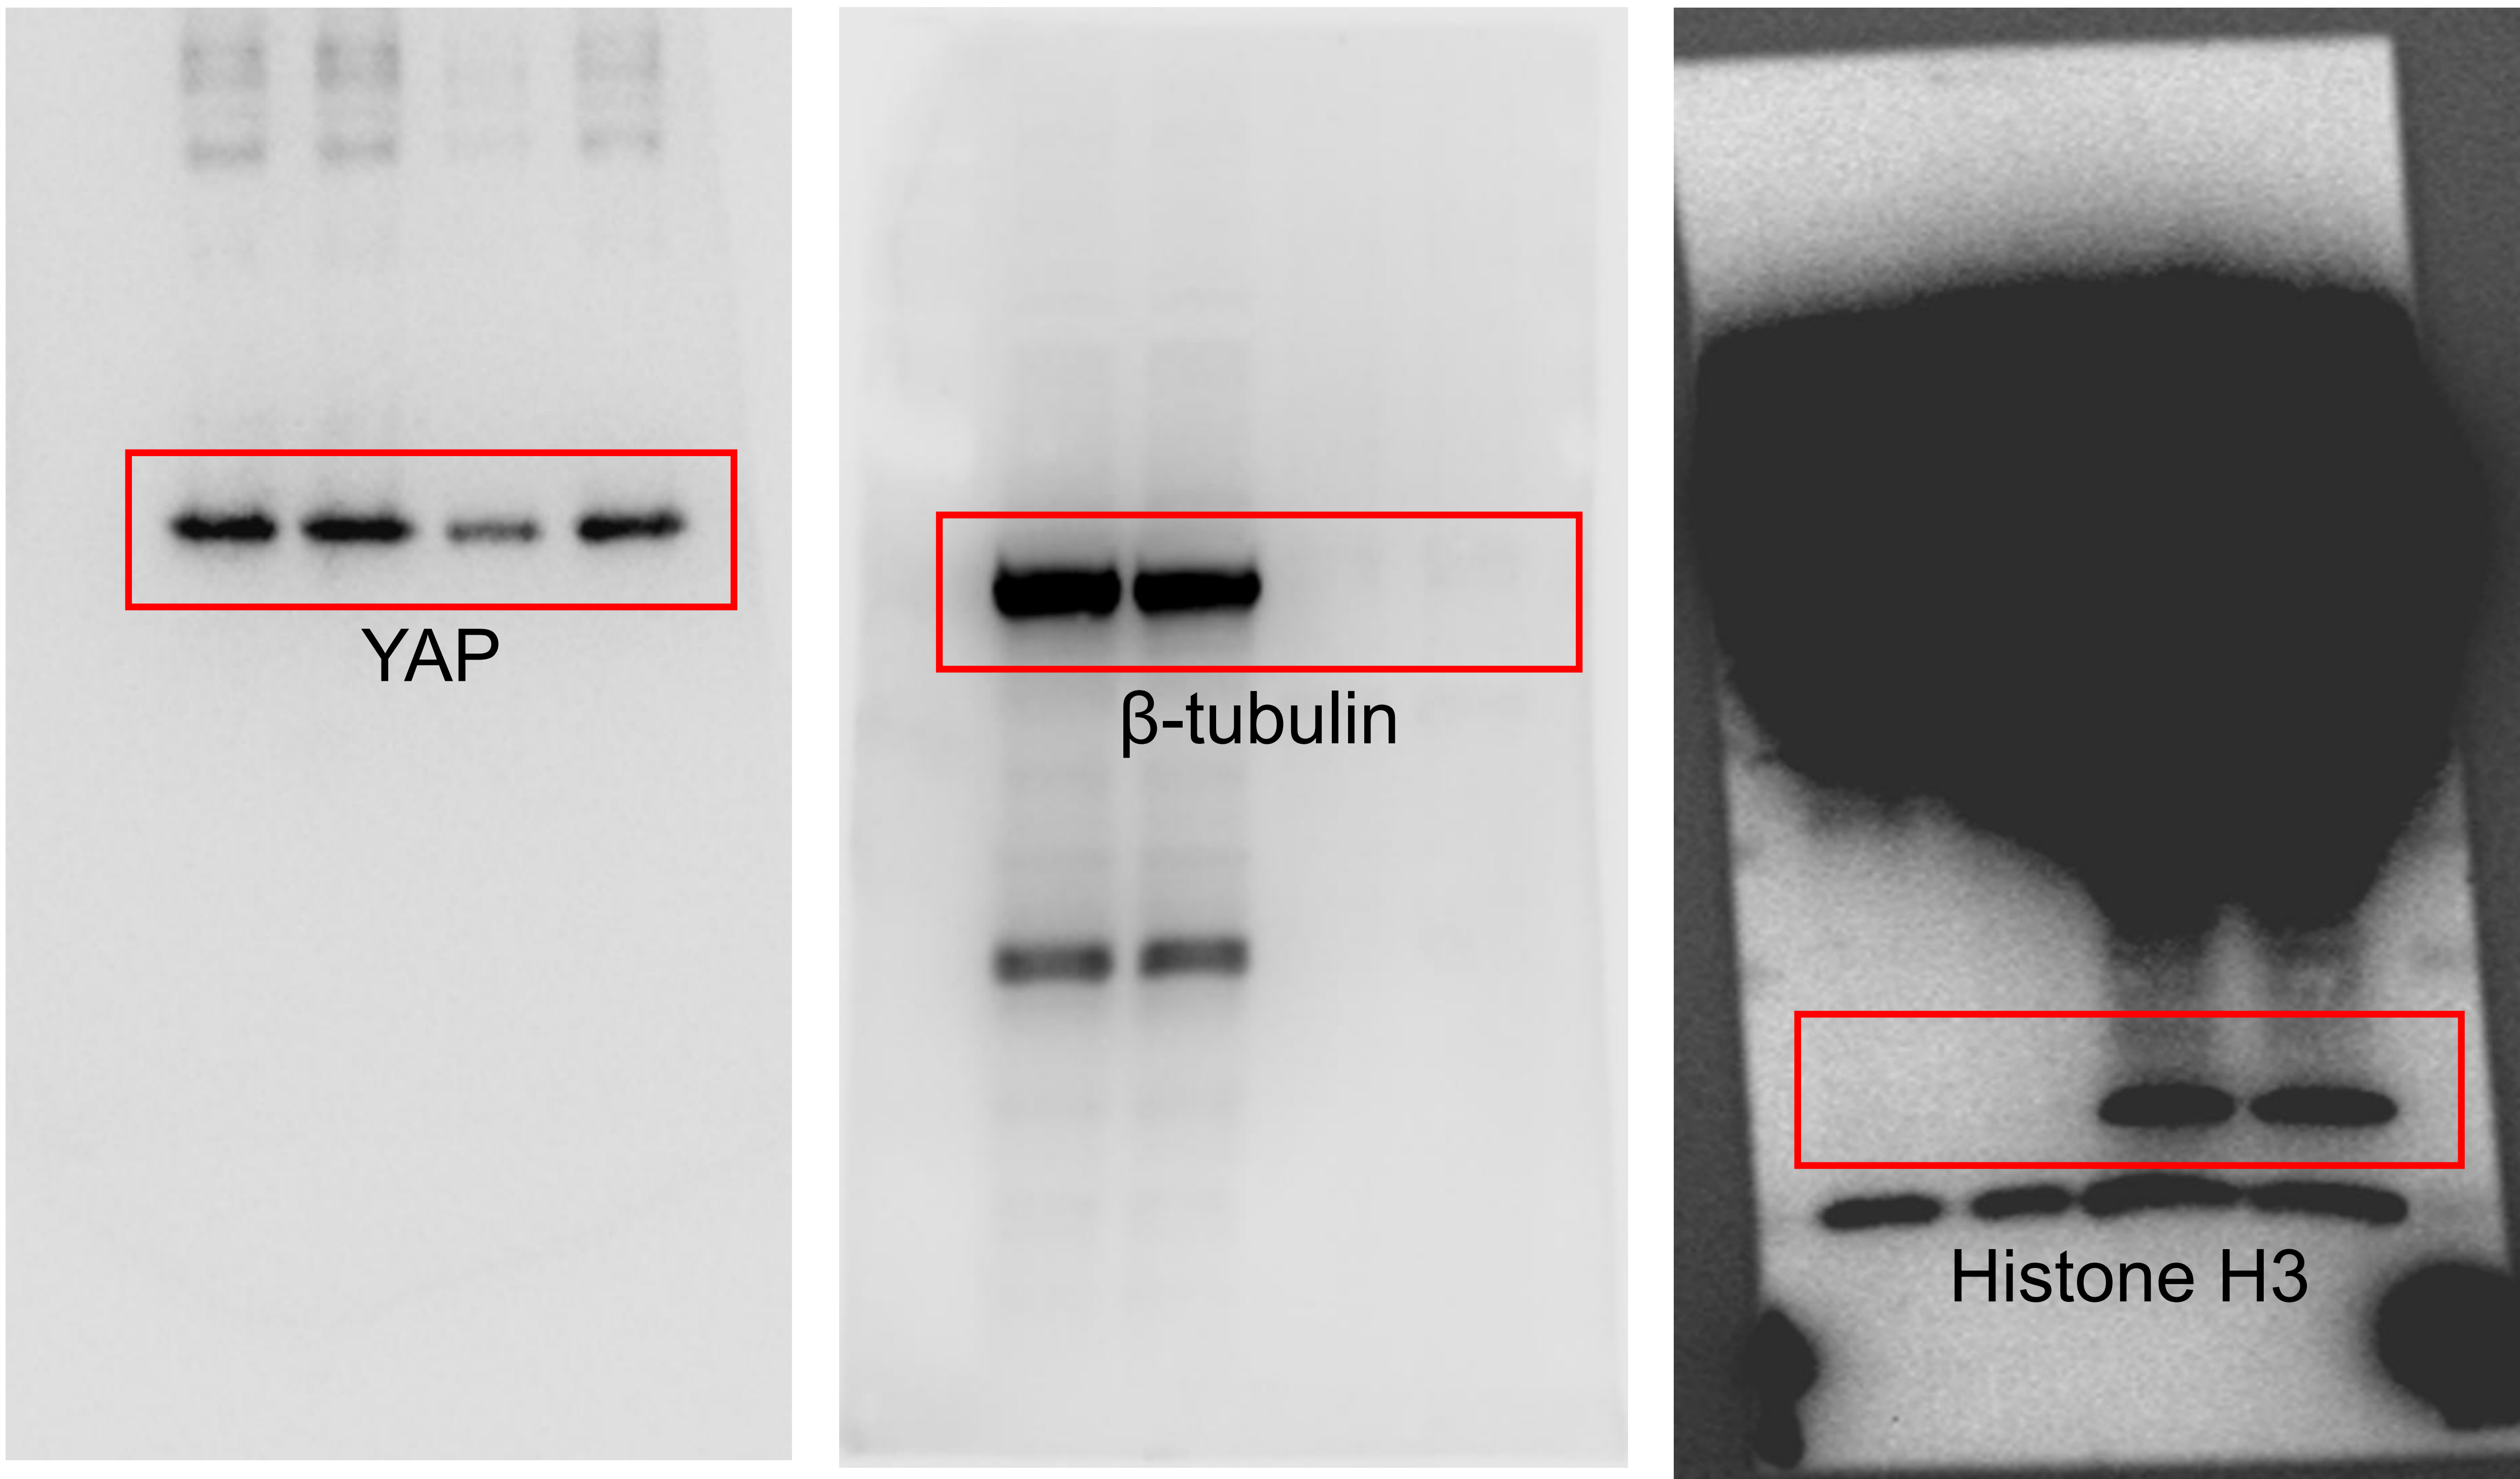

Figure S11B

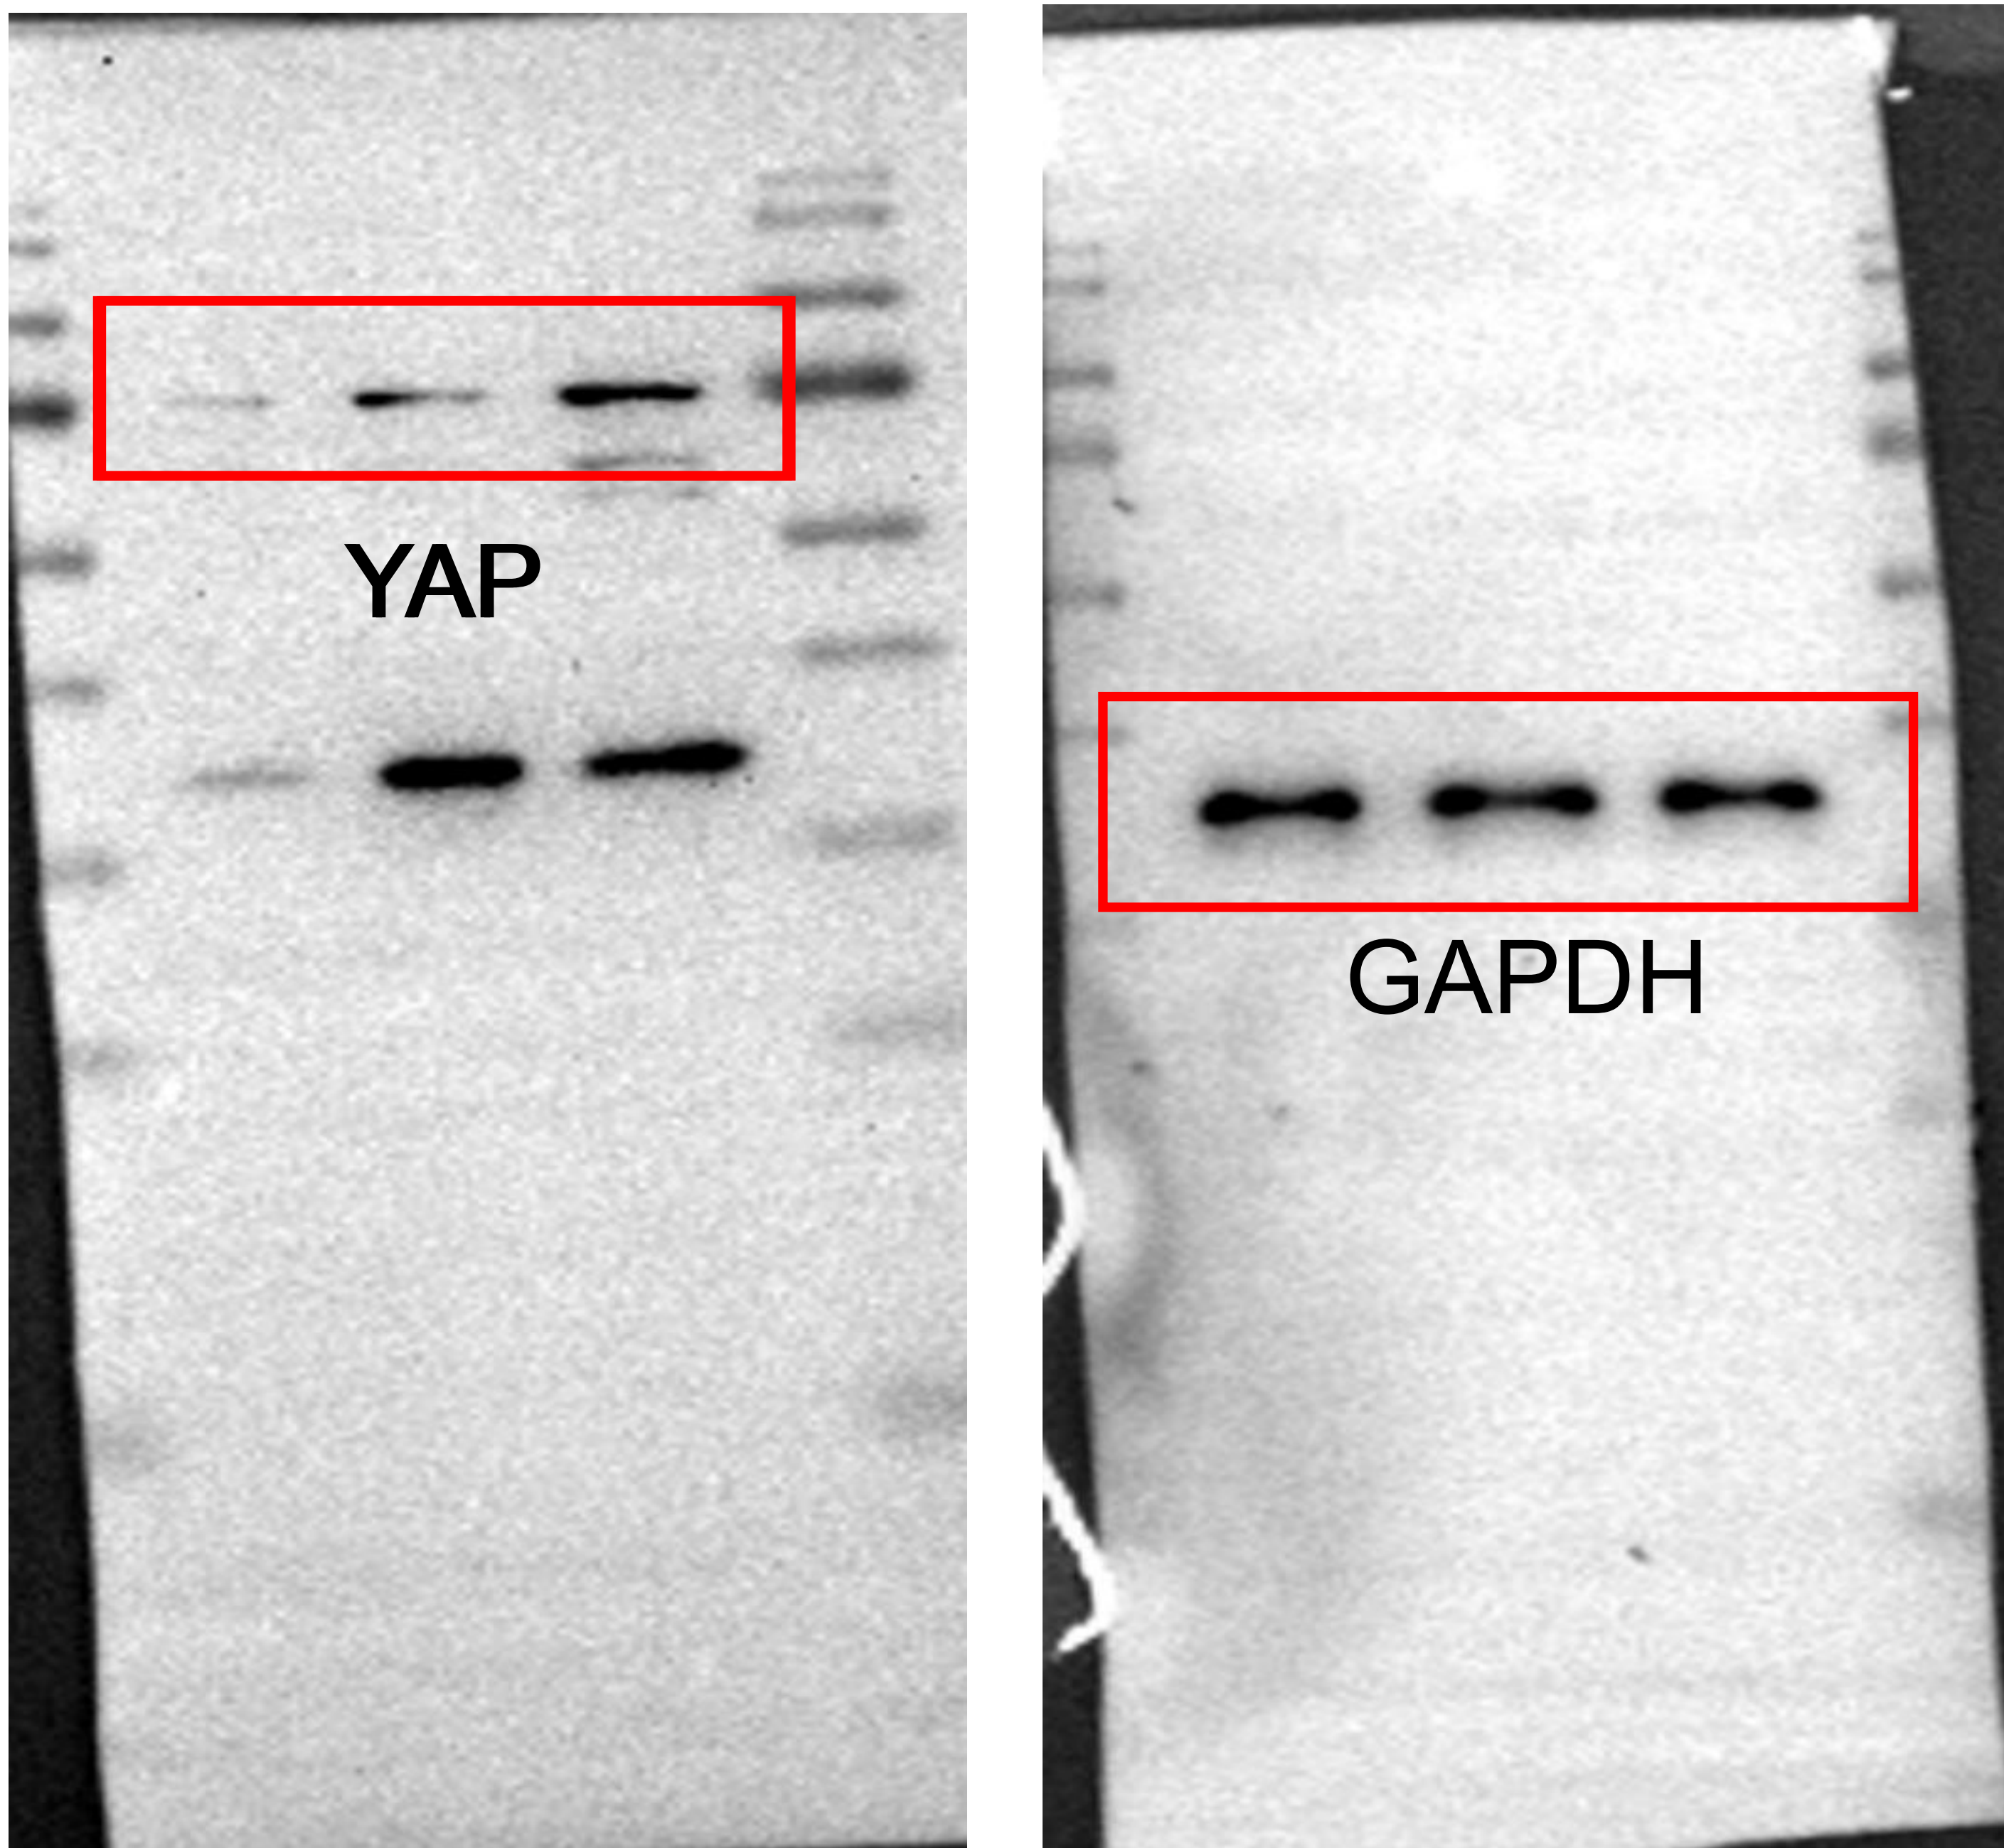

Figure S11C

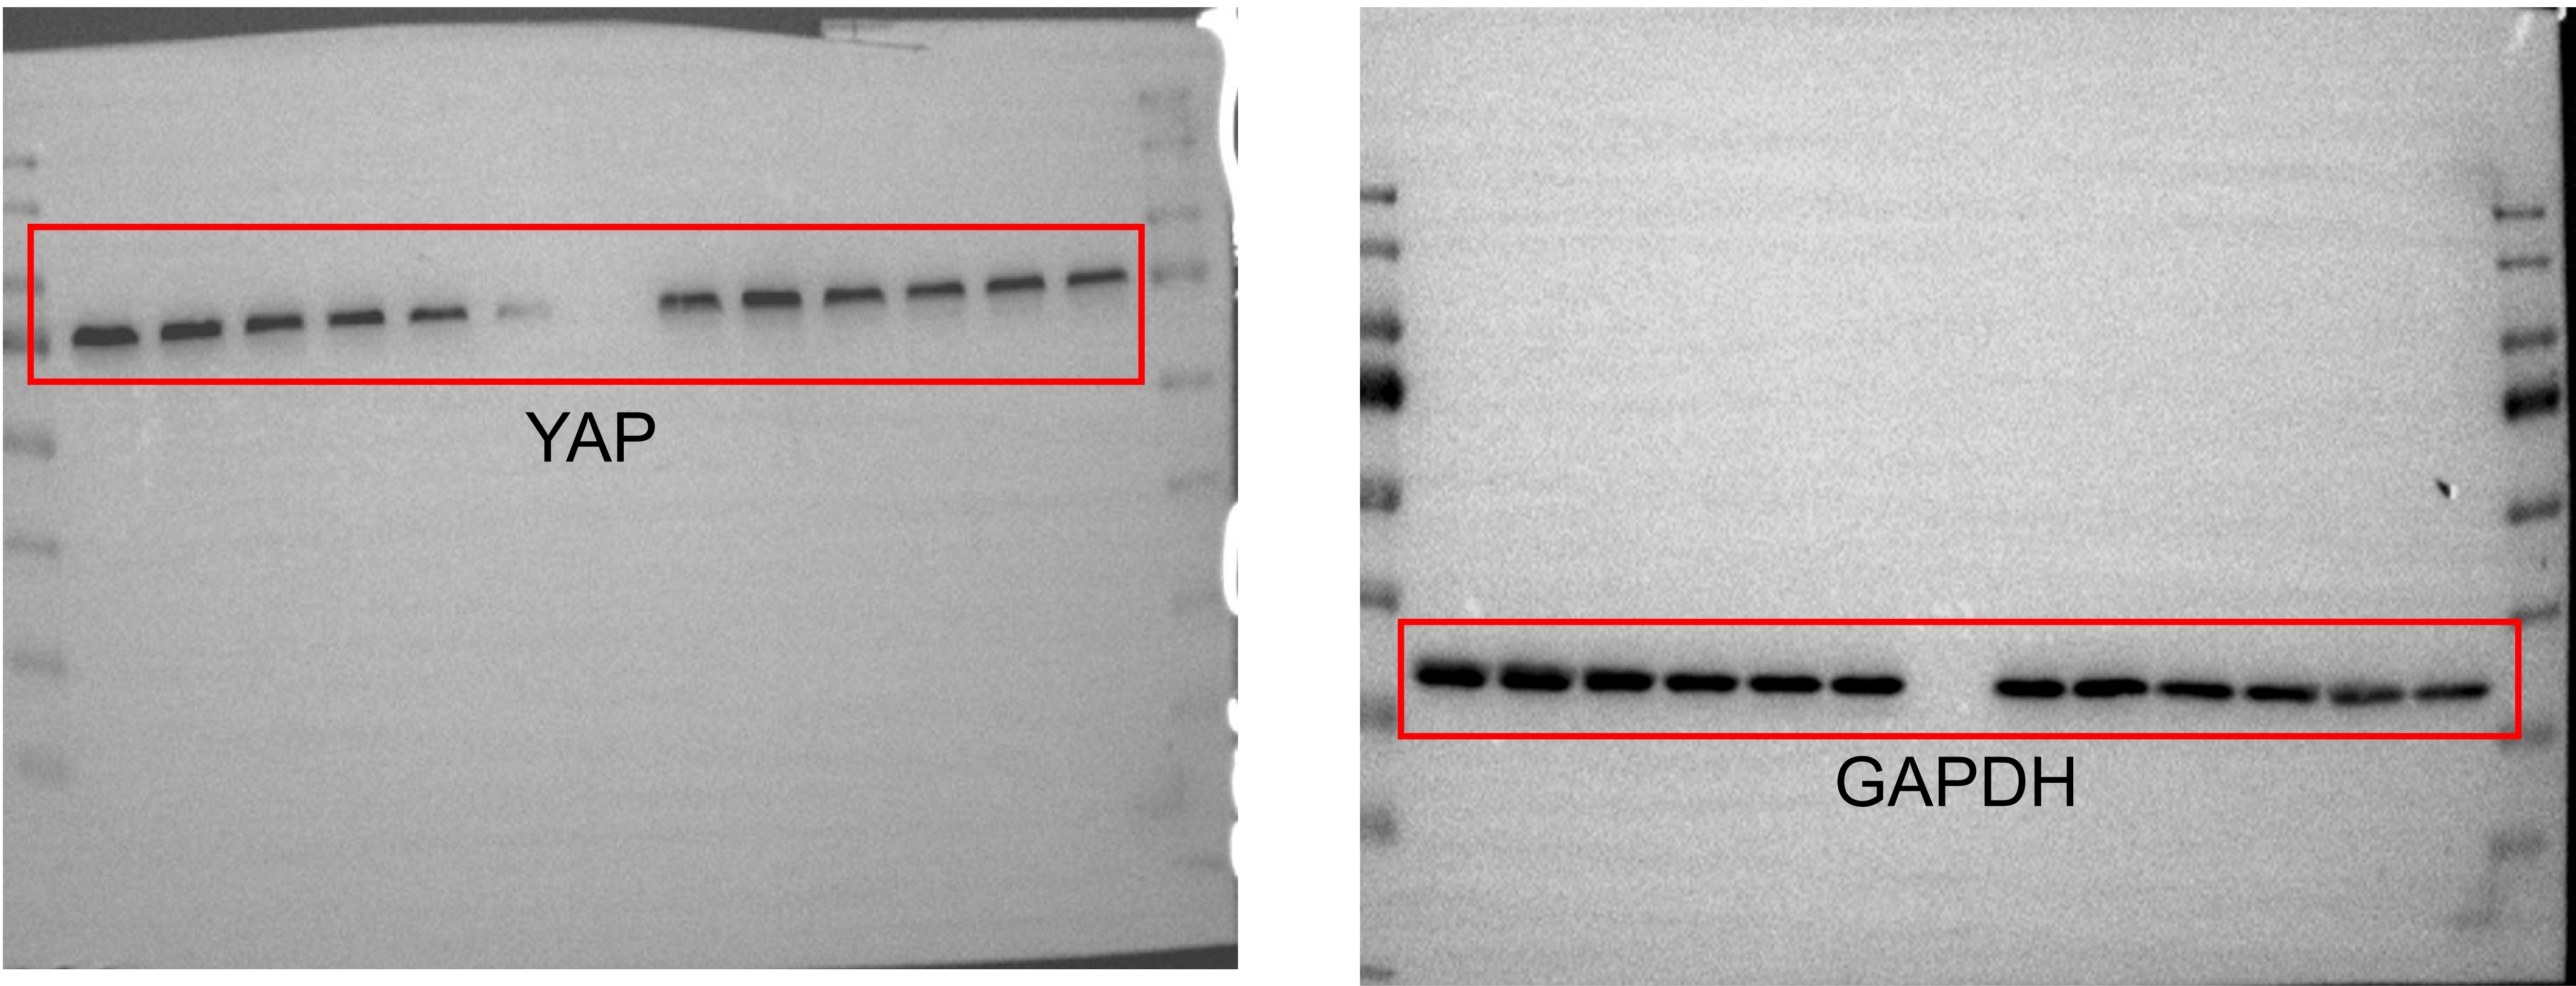



Figure S11D

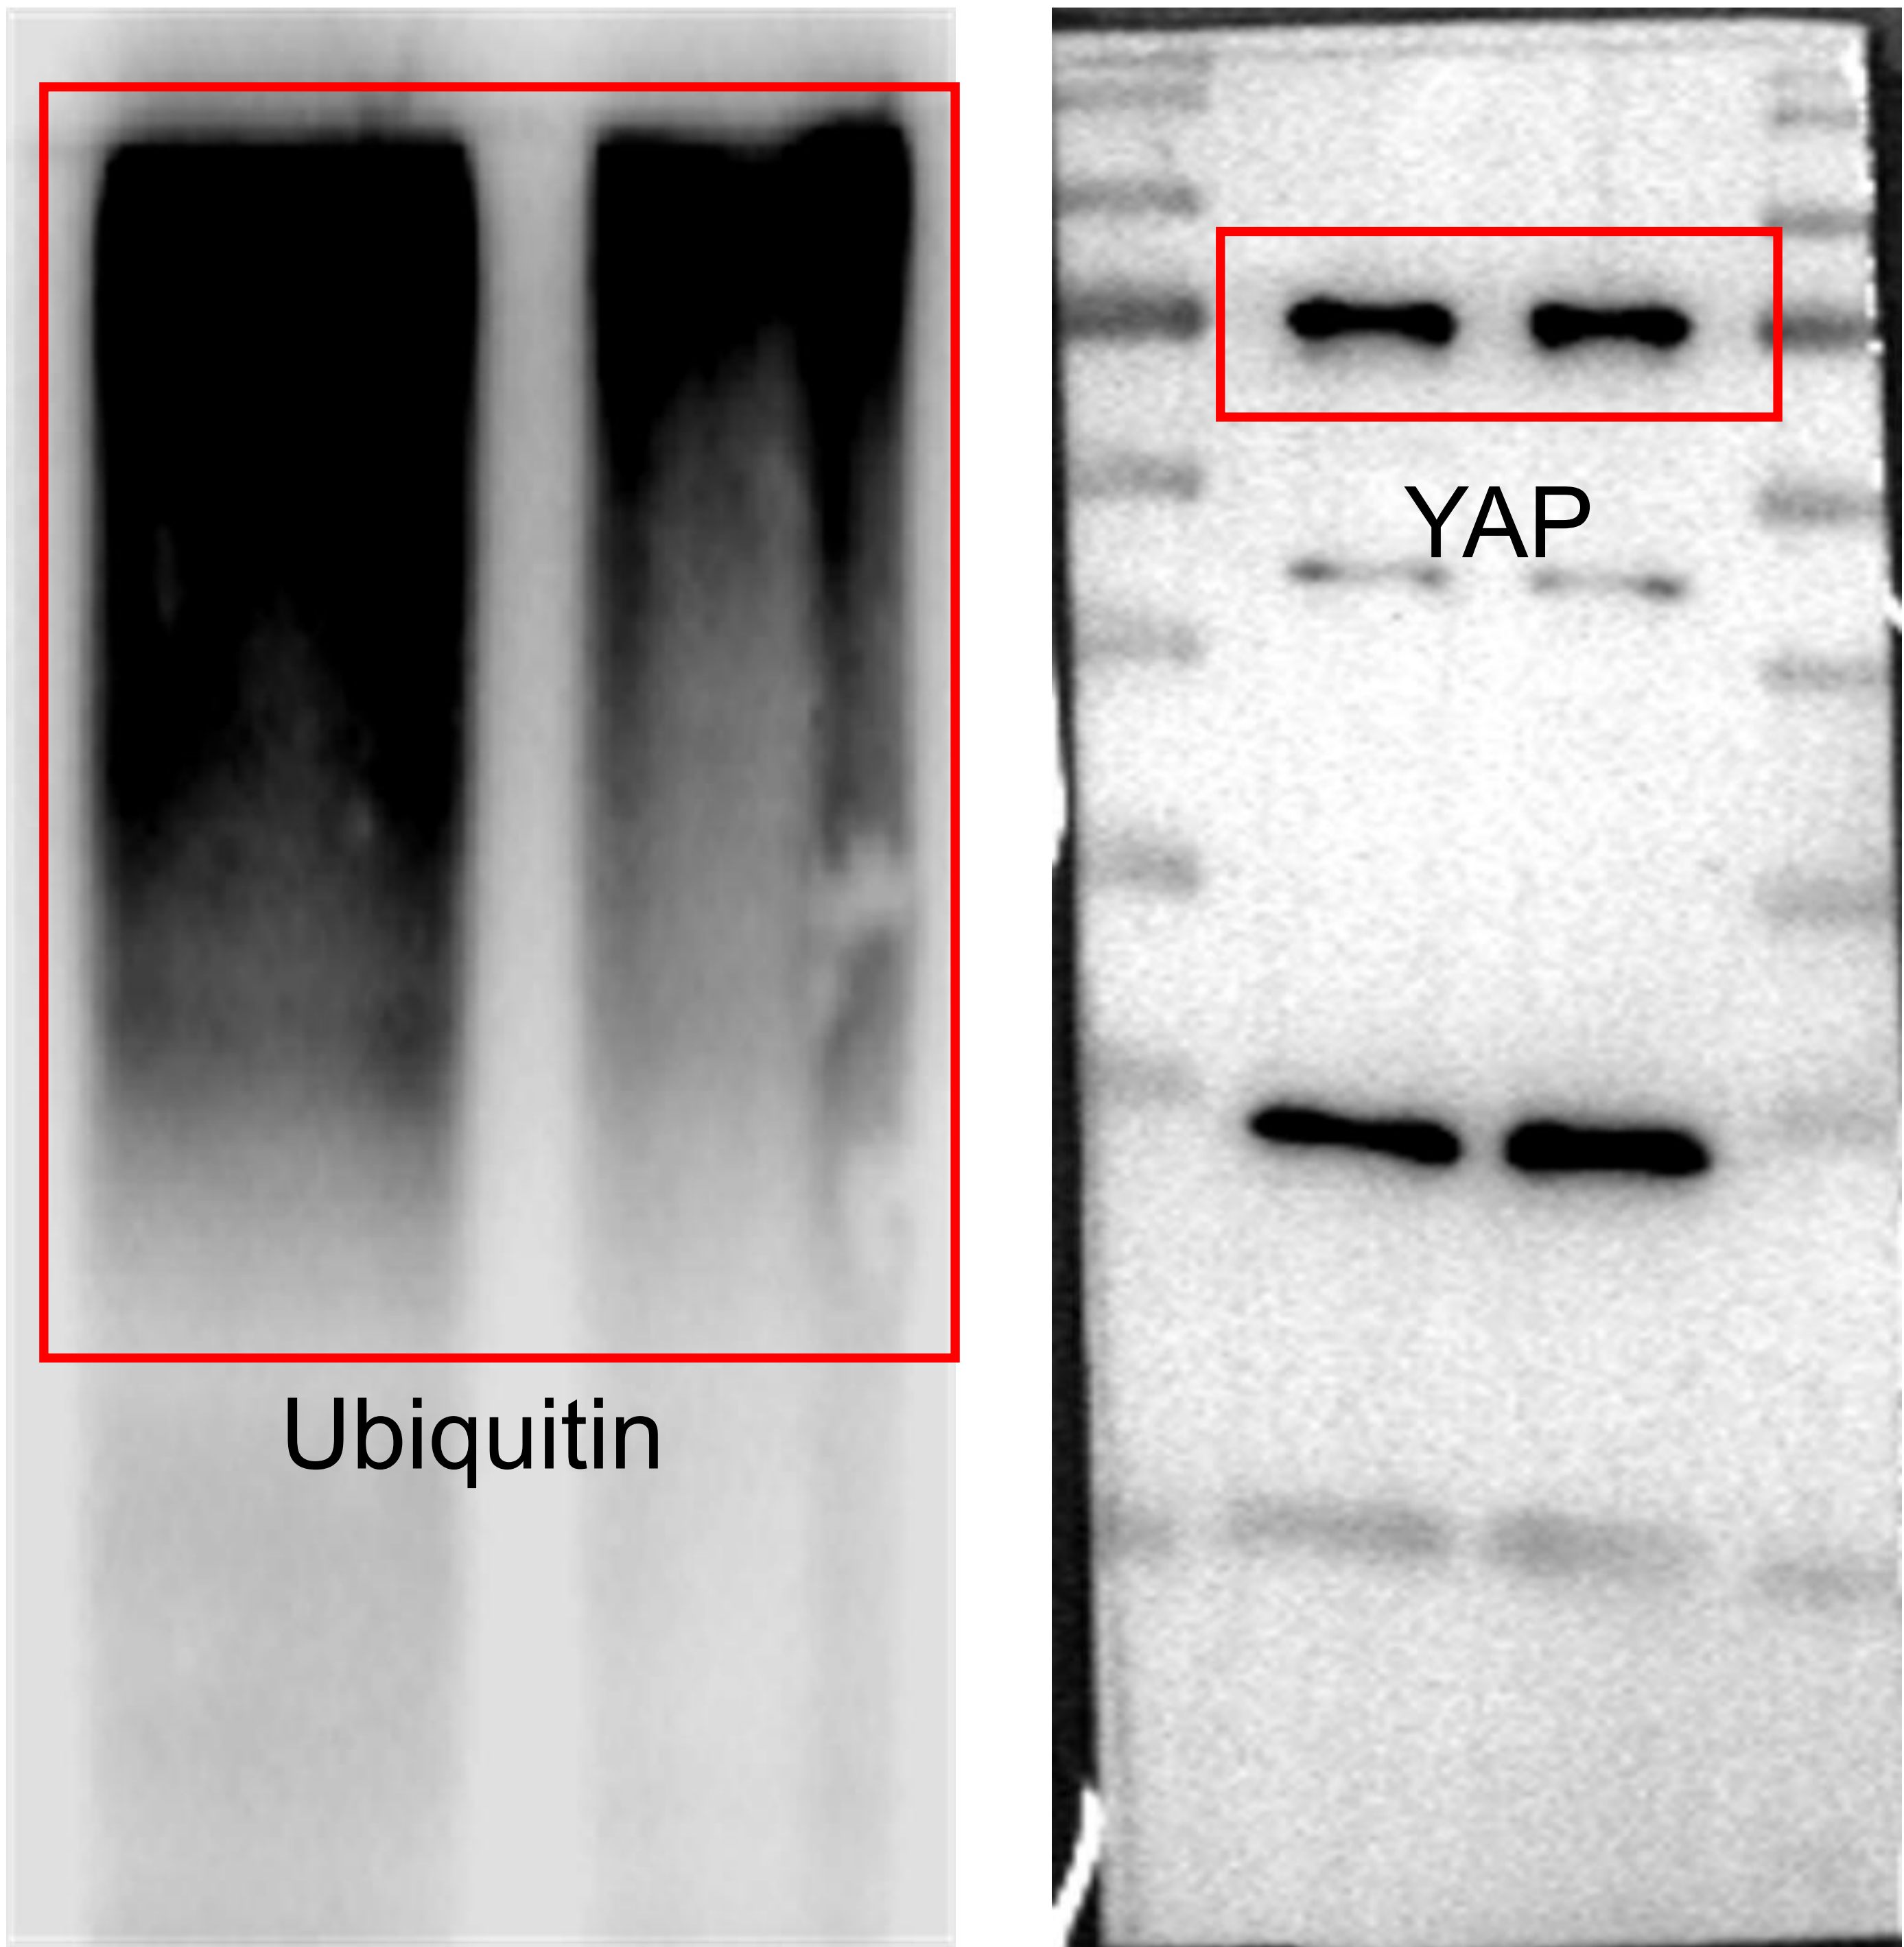

Figure S11E

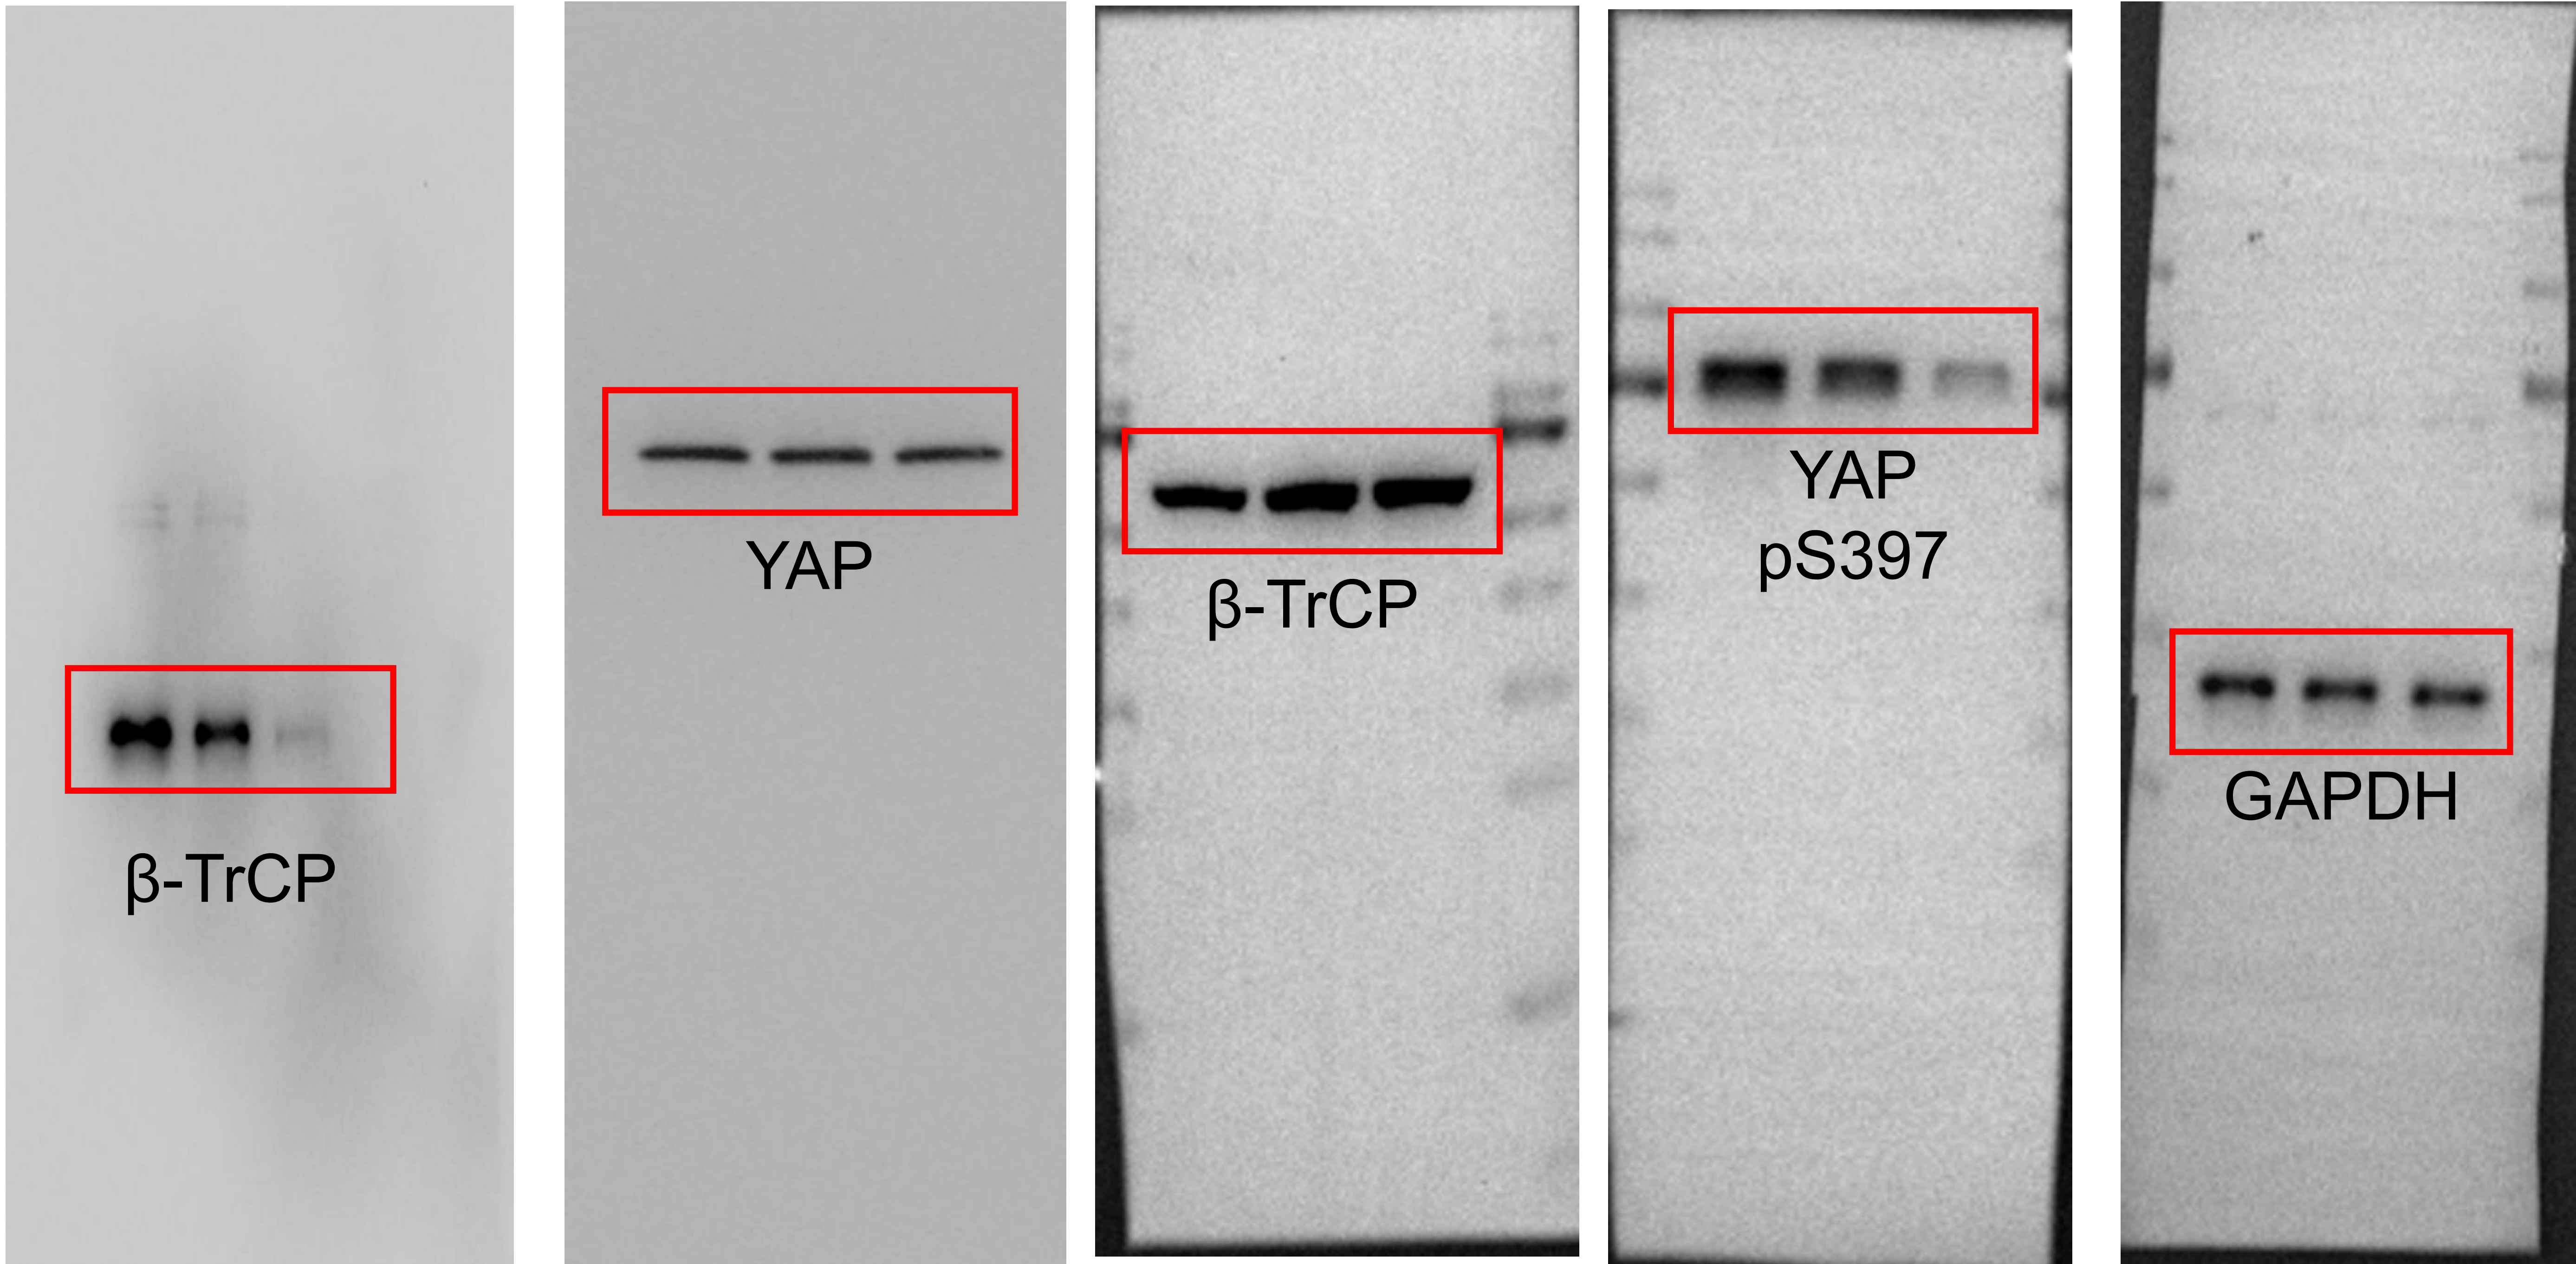

Figure 5A

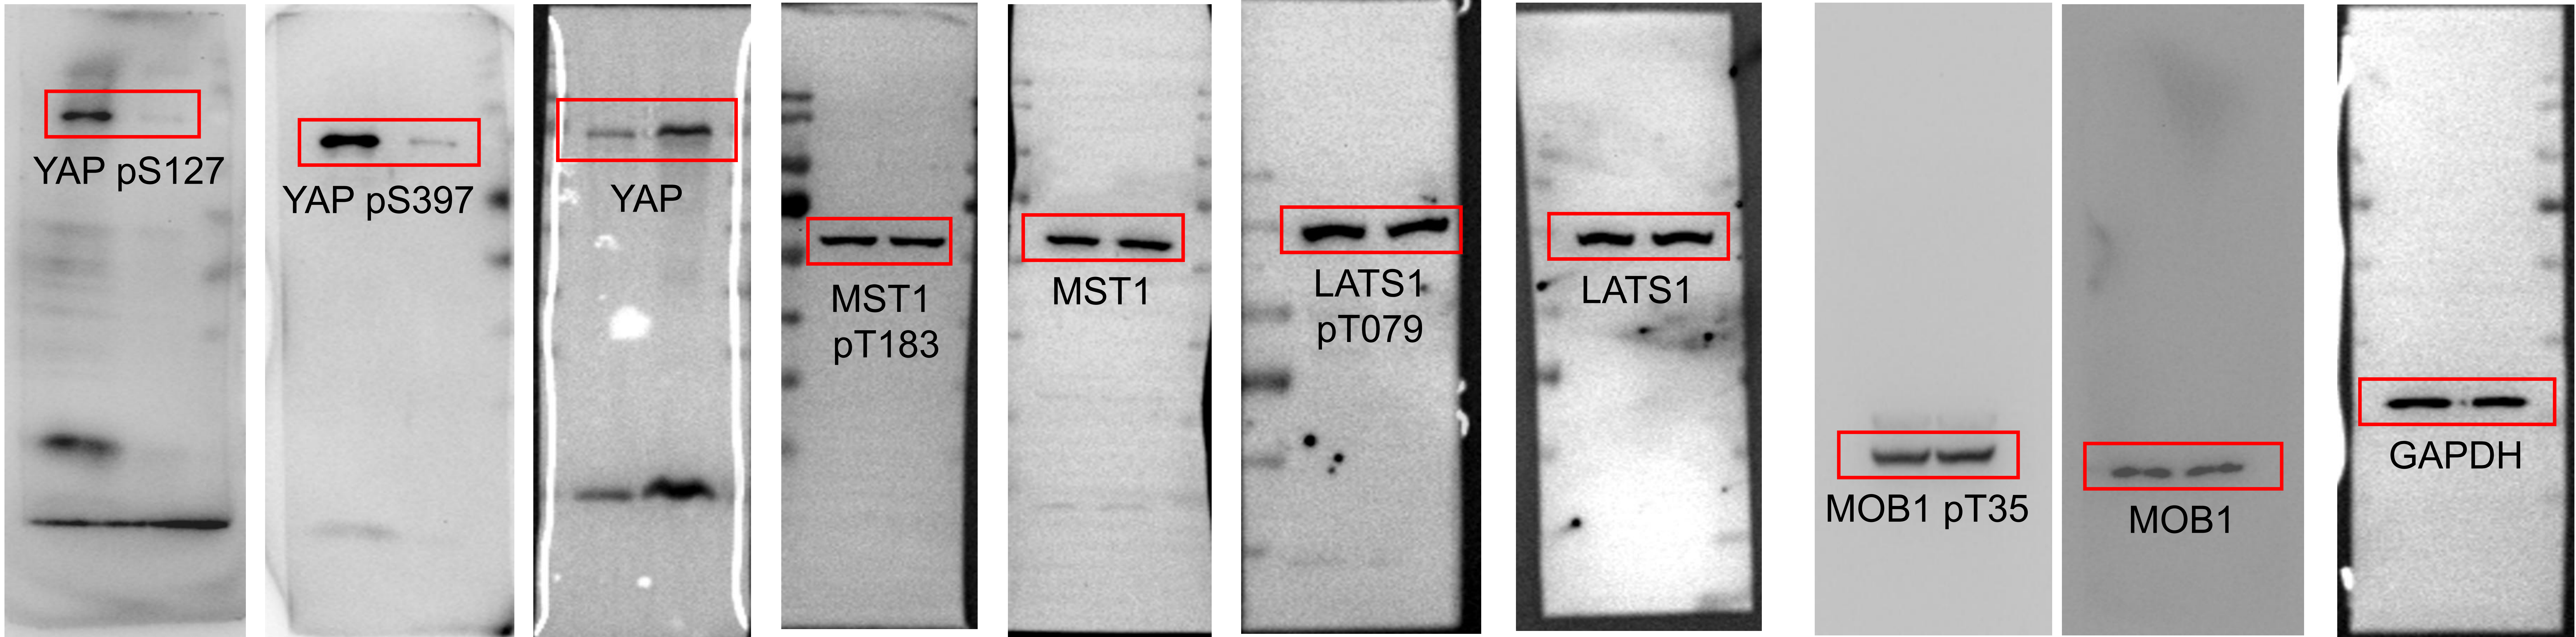

Figure 5B

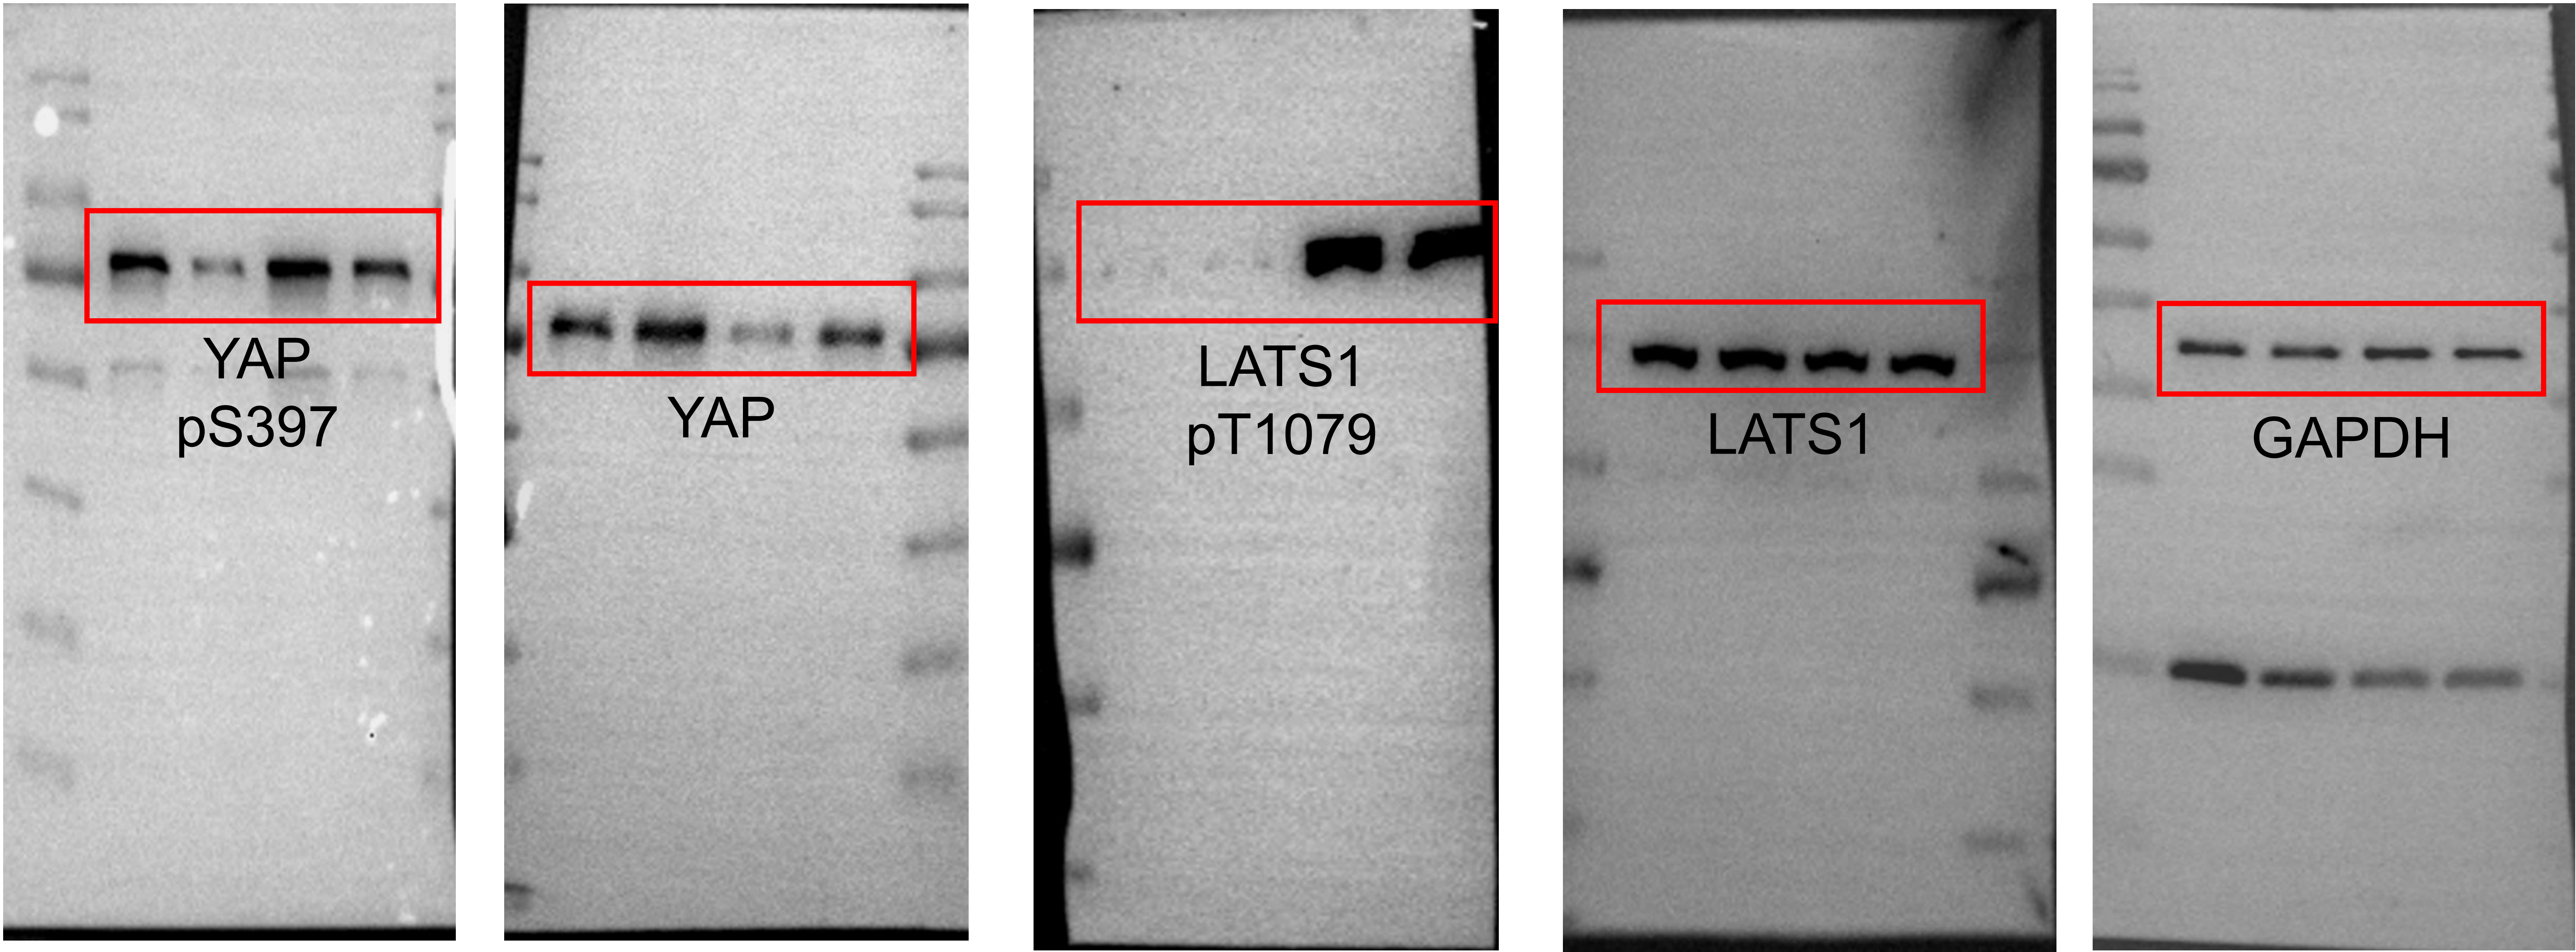



Figure 5C

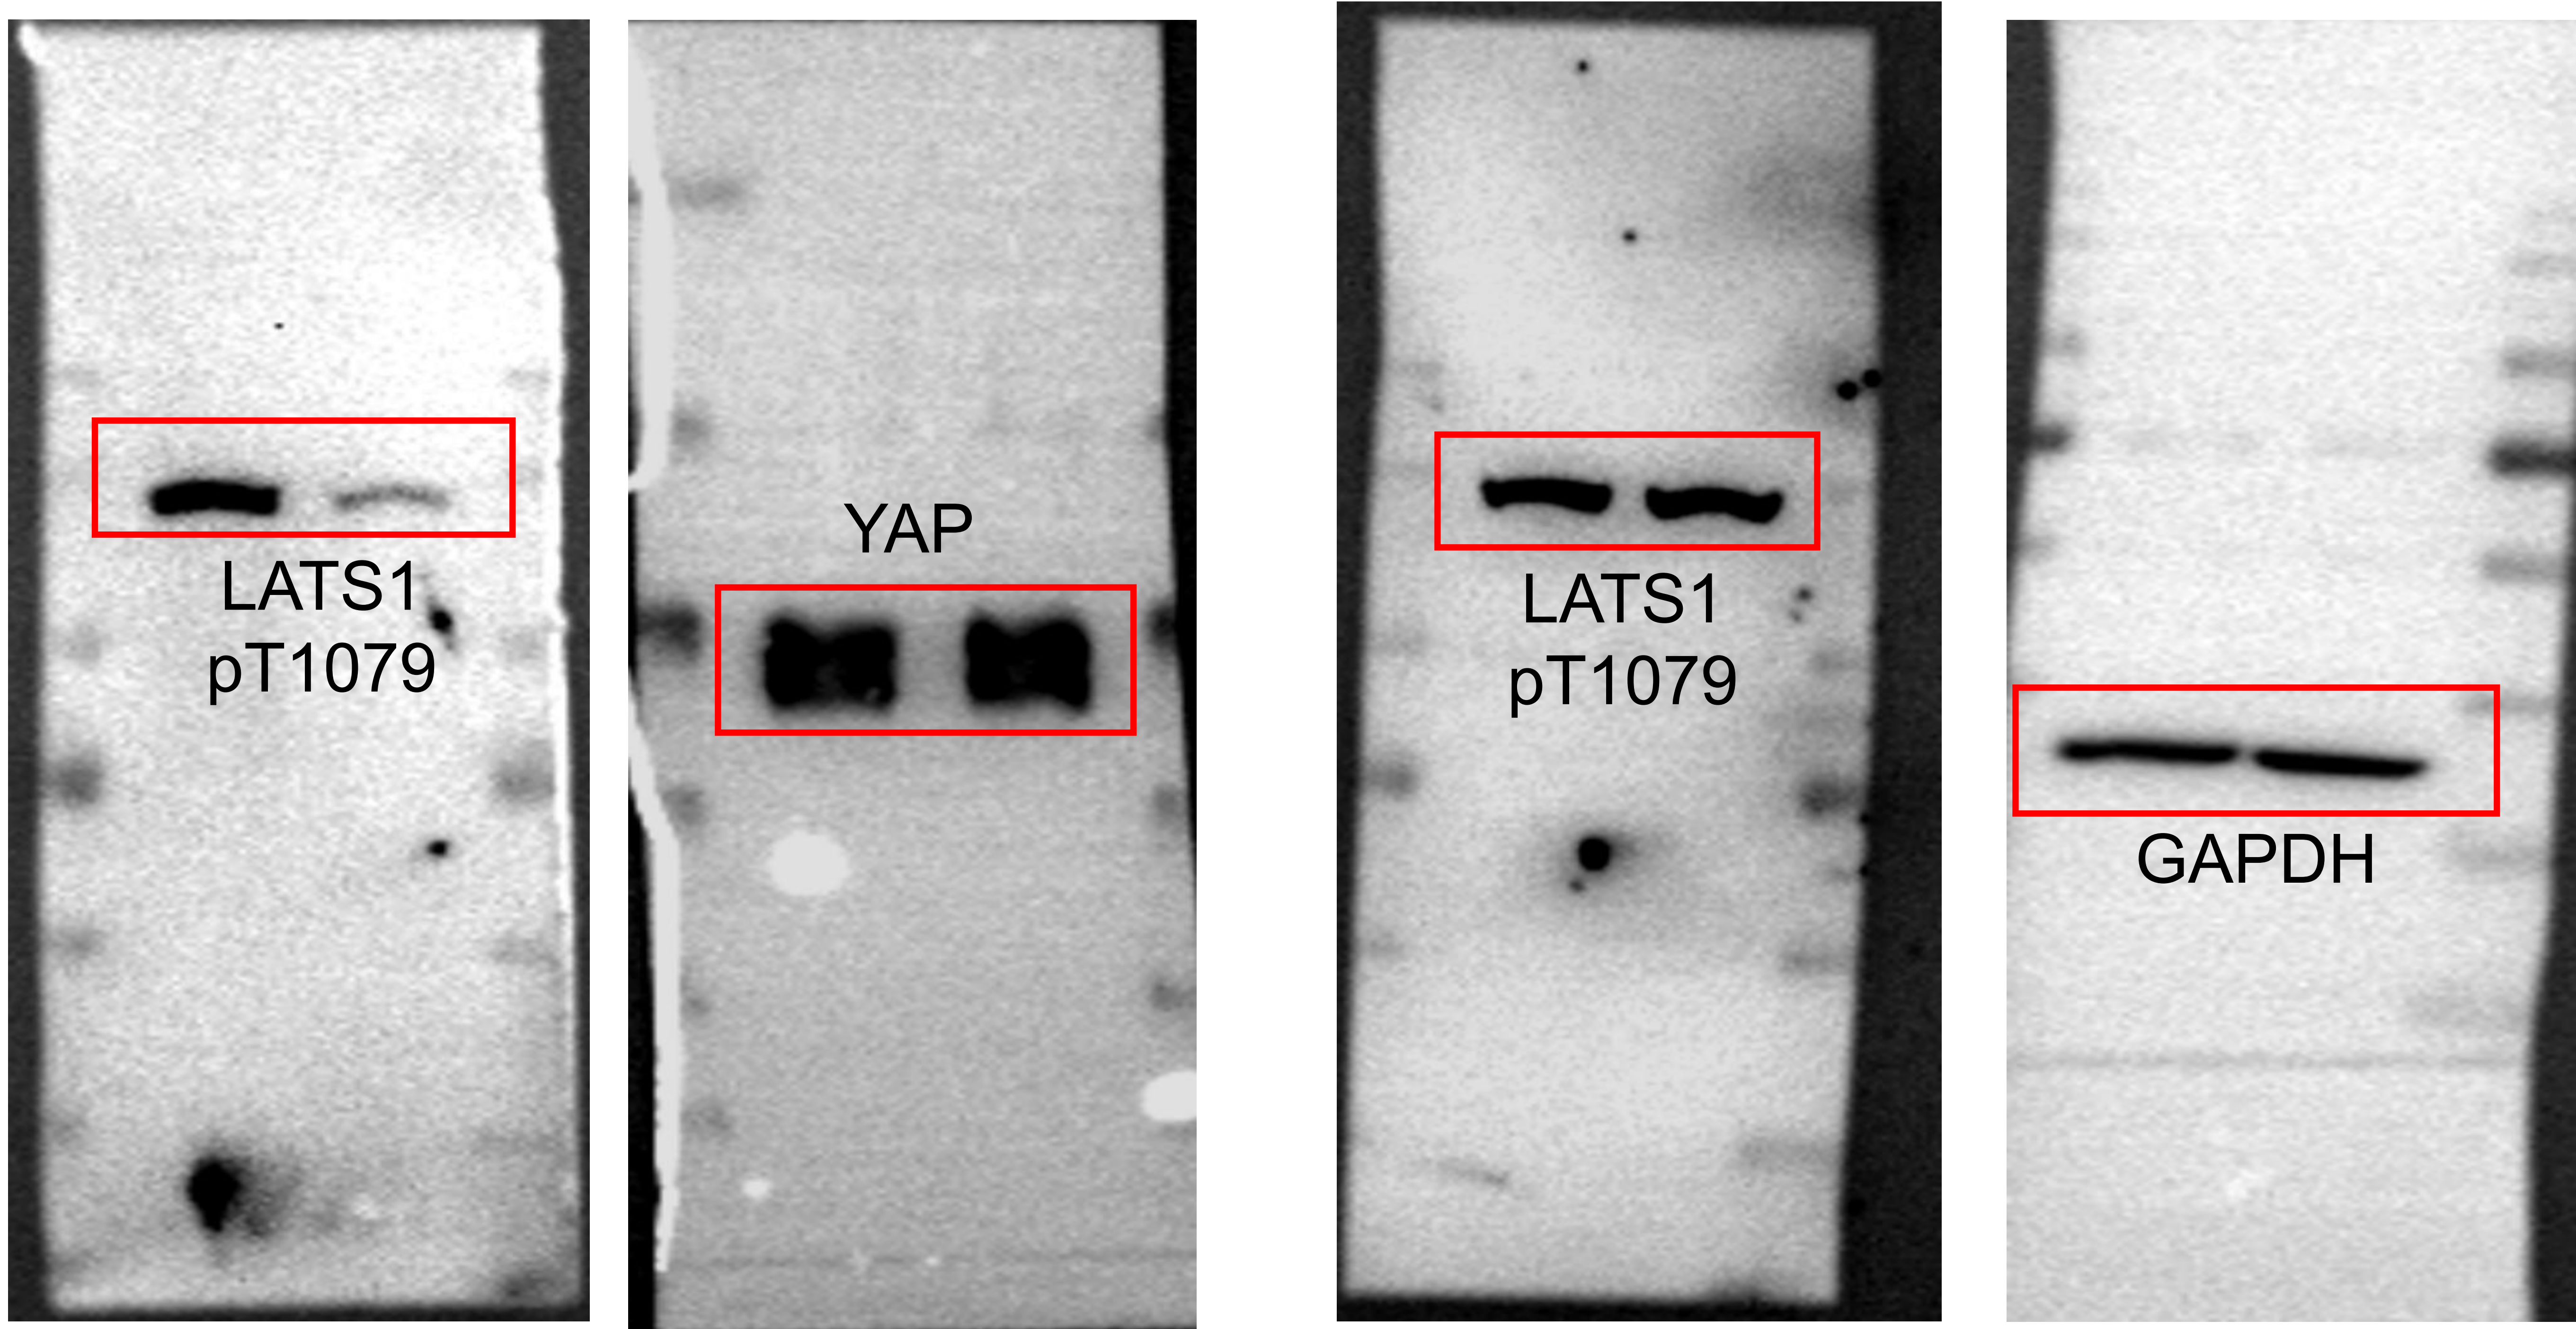

Figure 5K

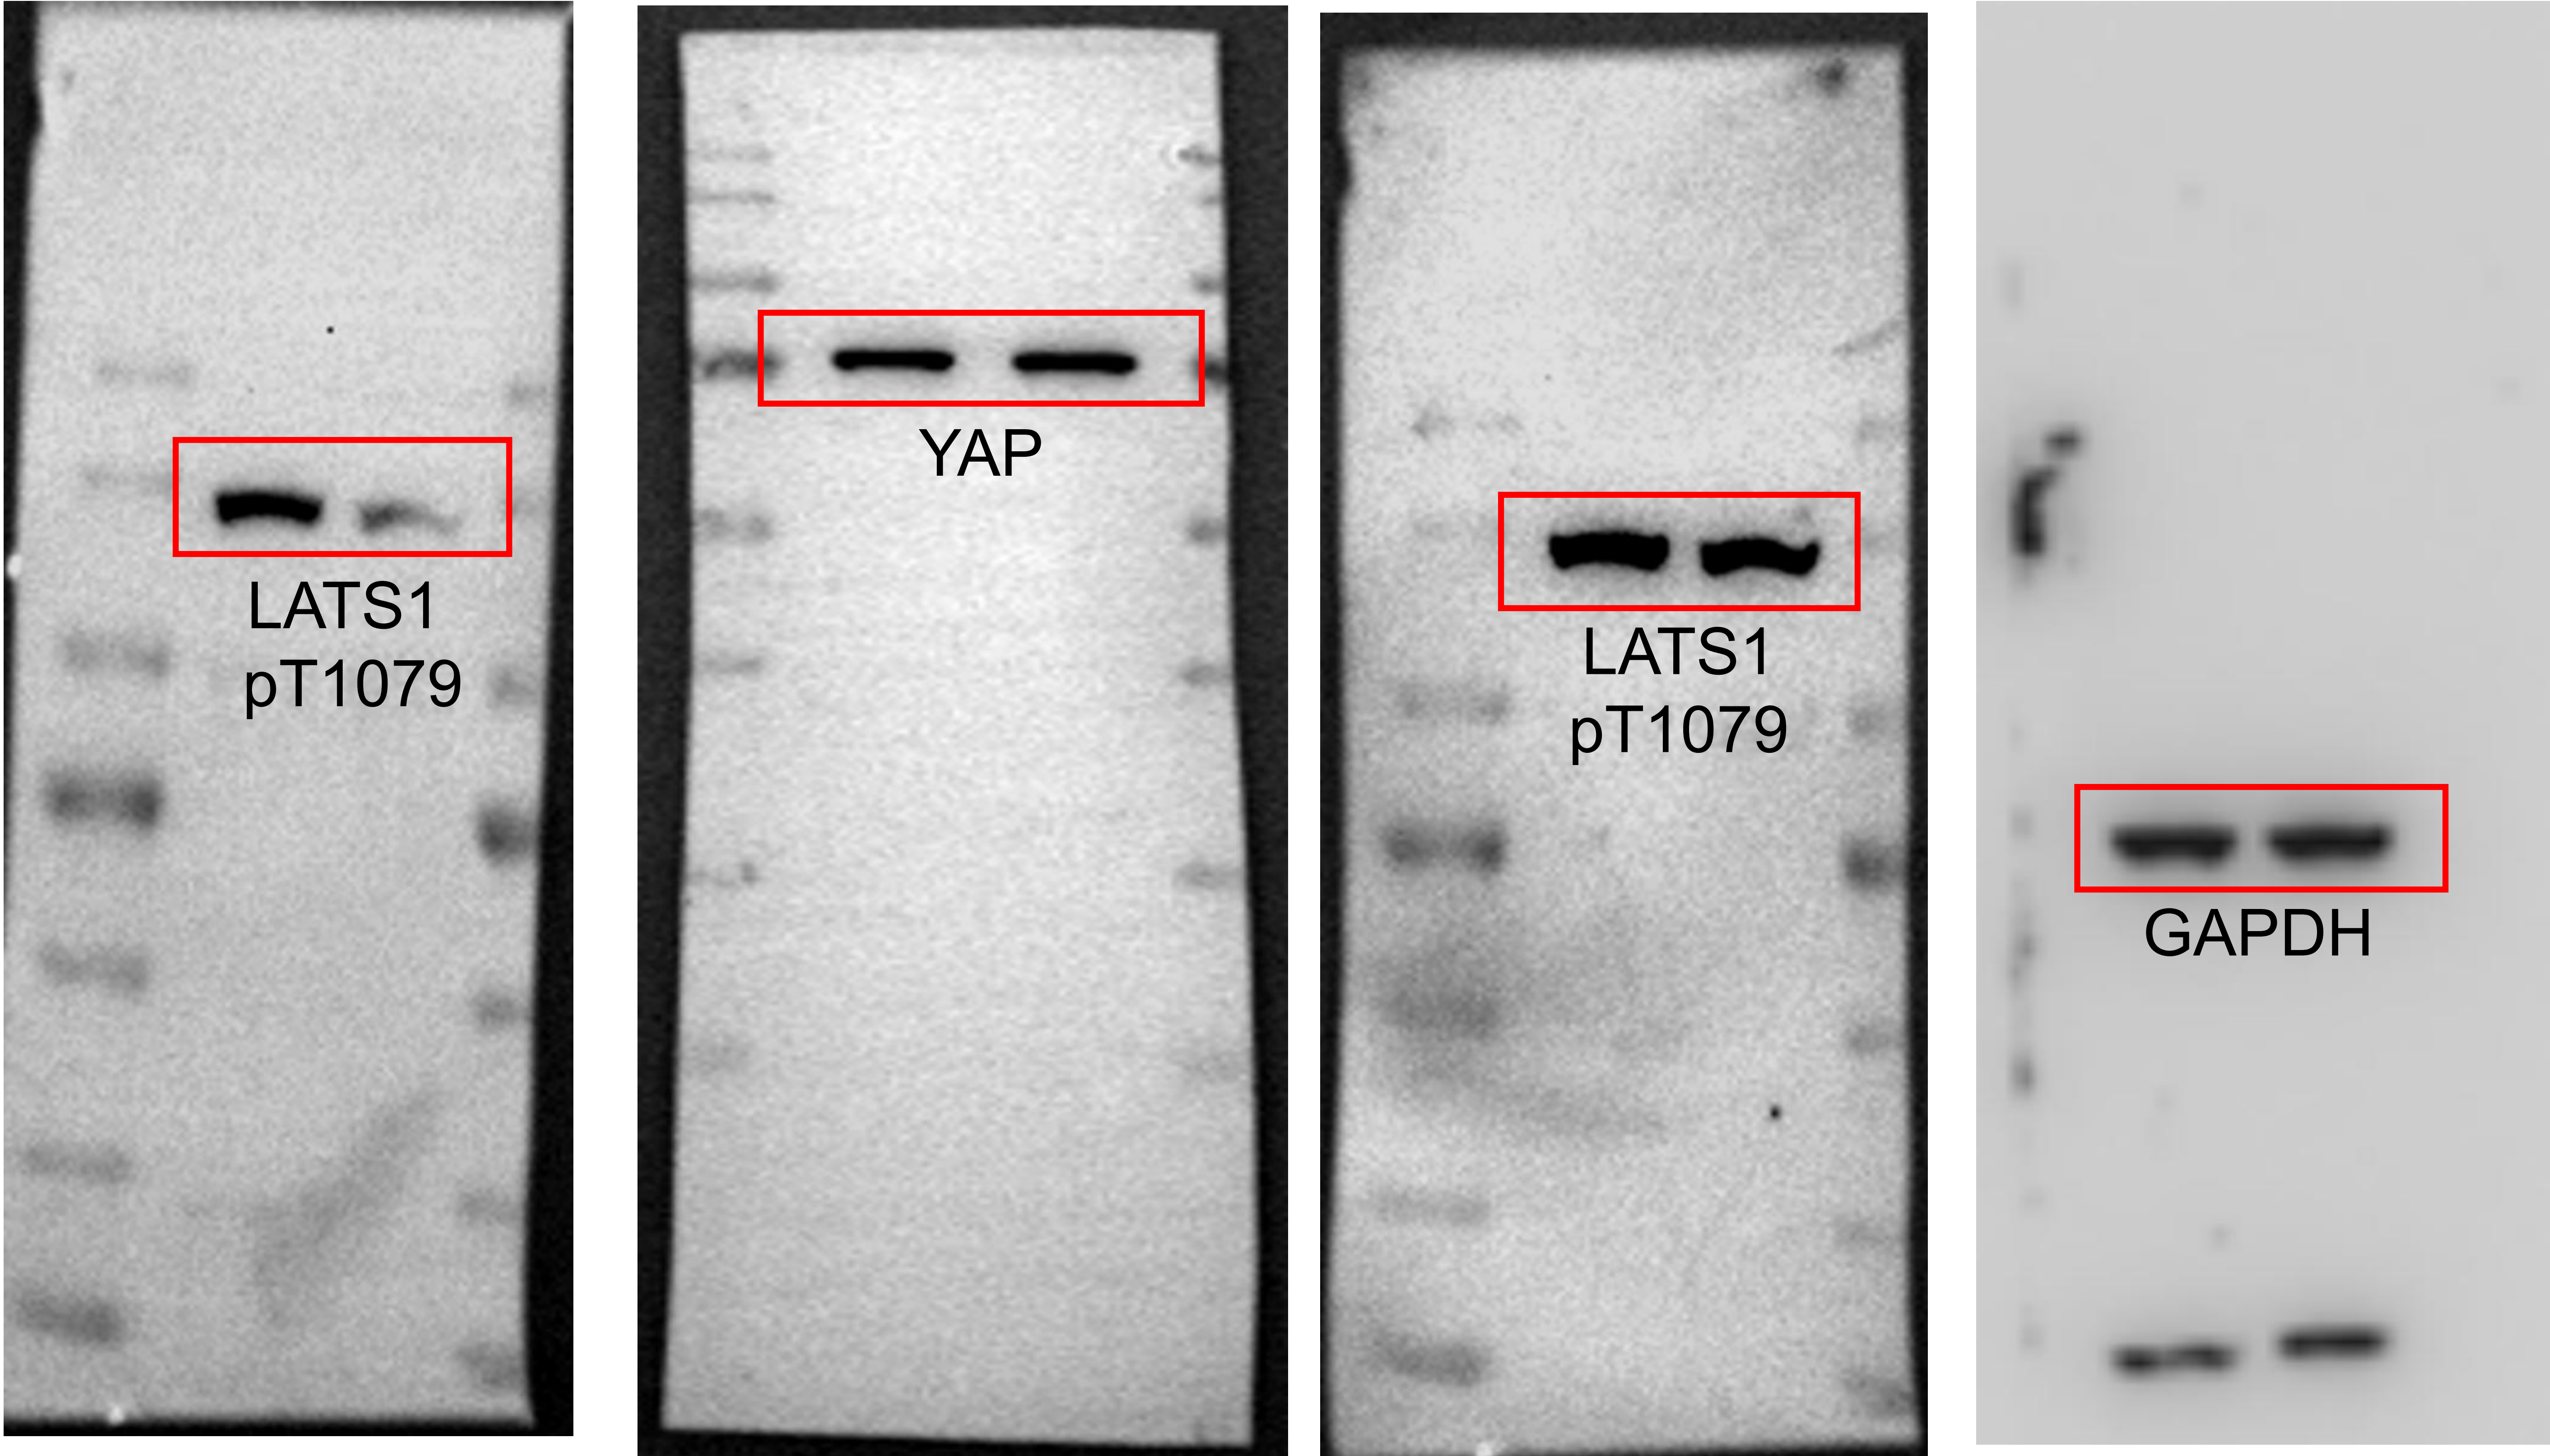

Figure 5M

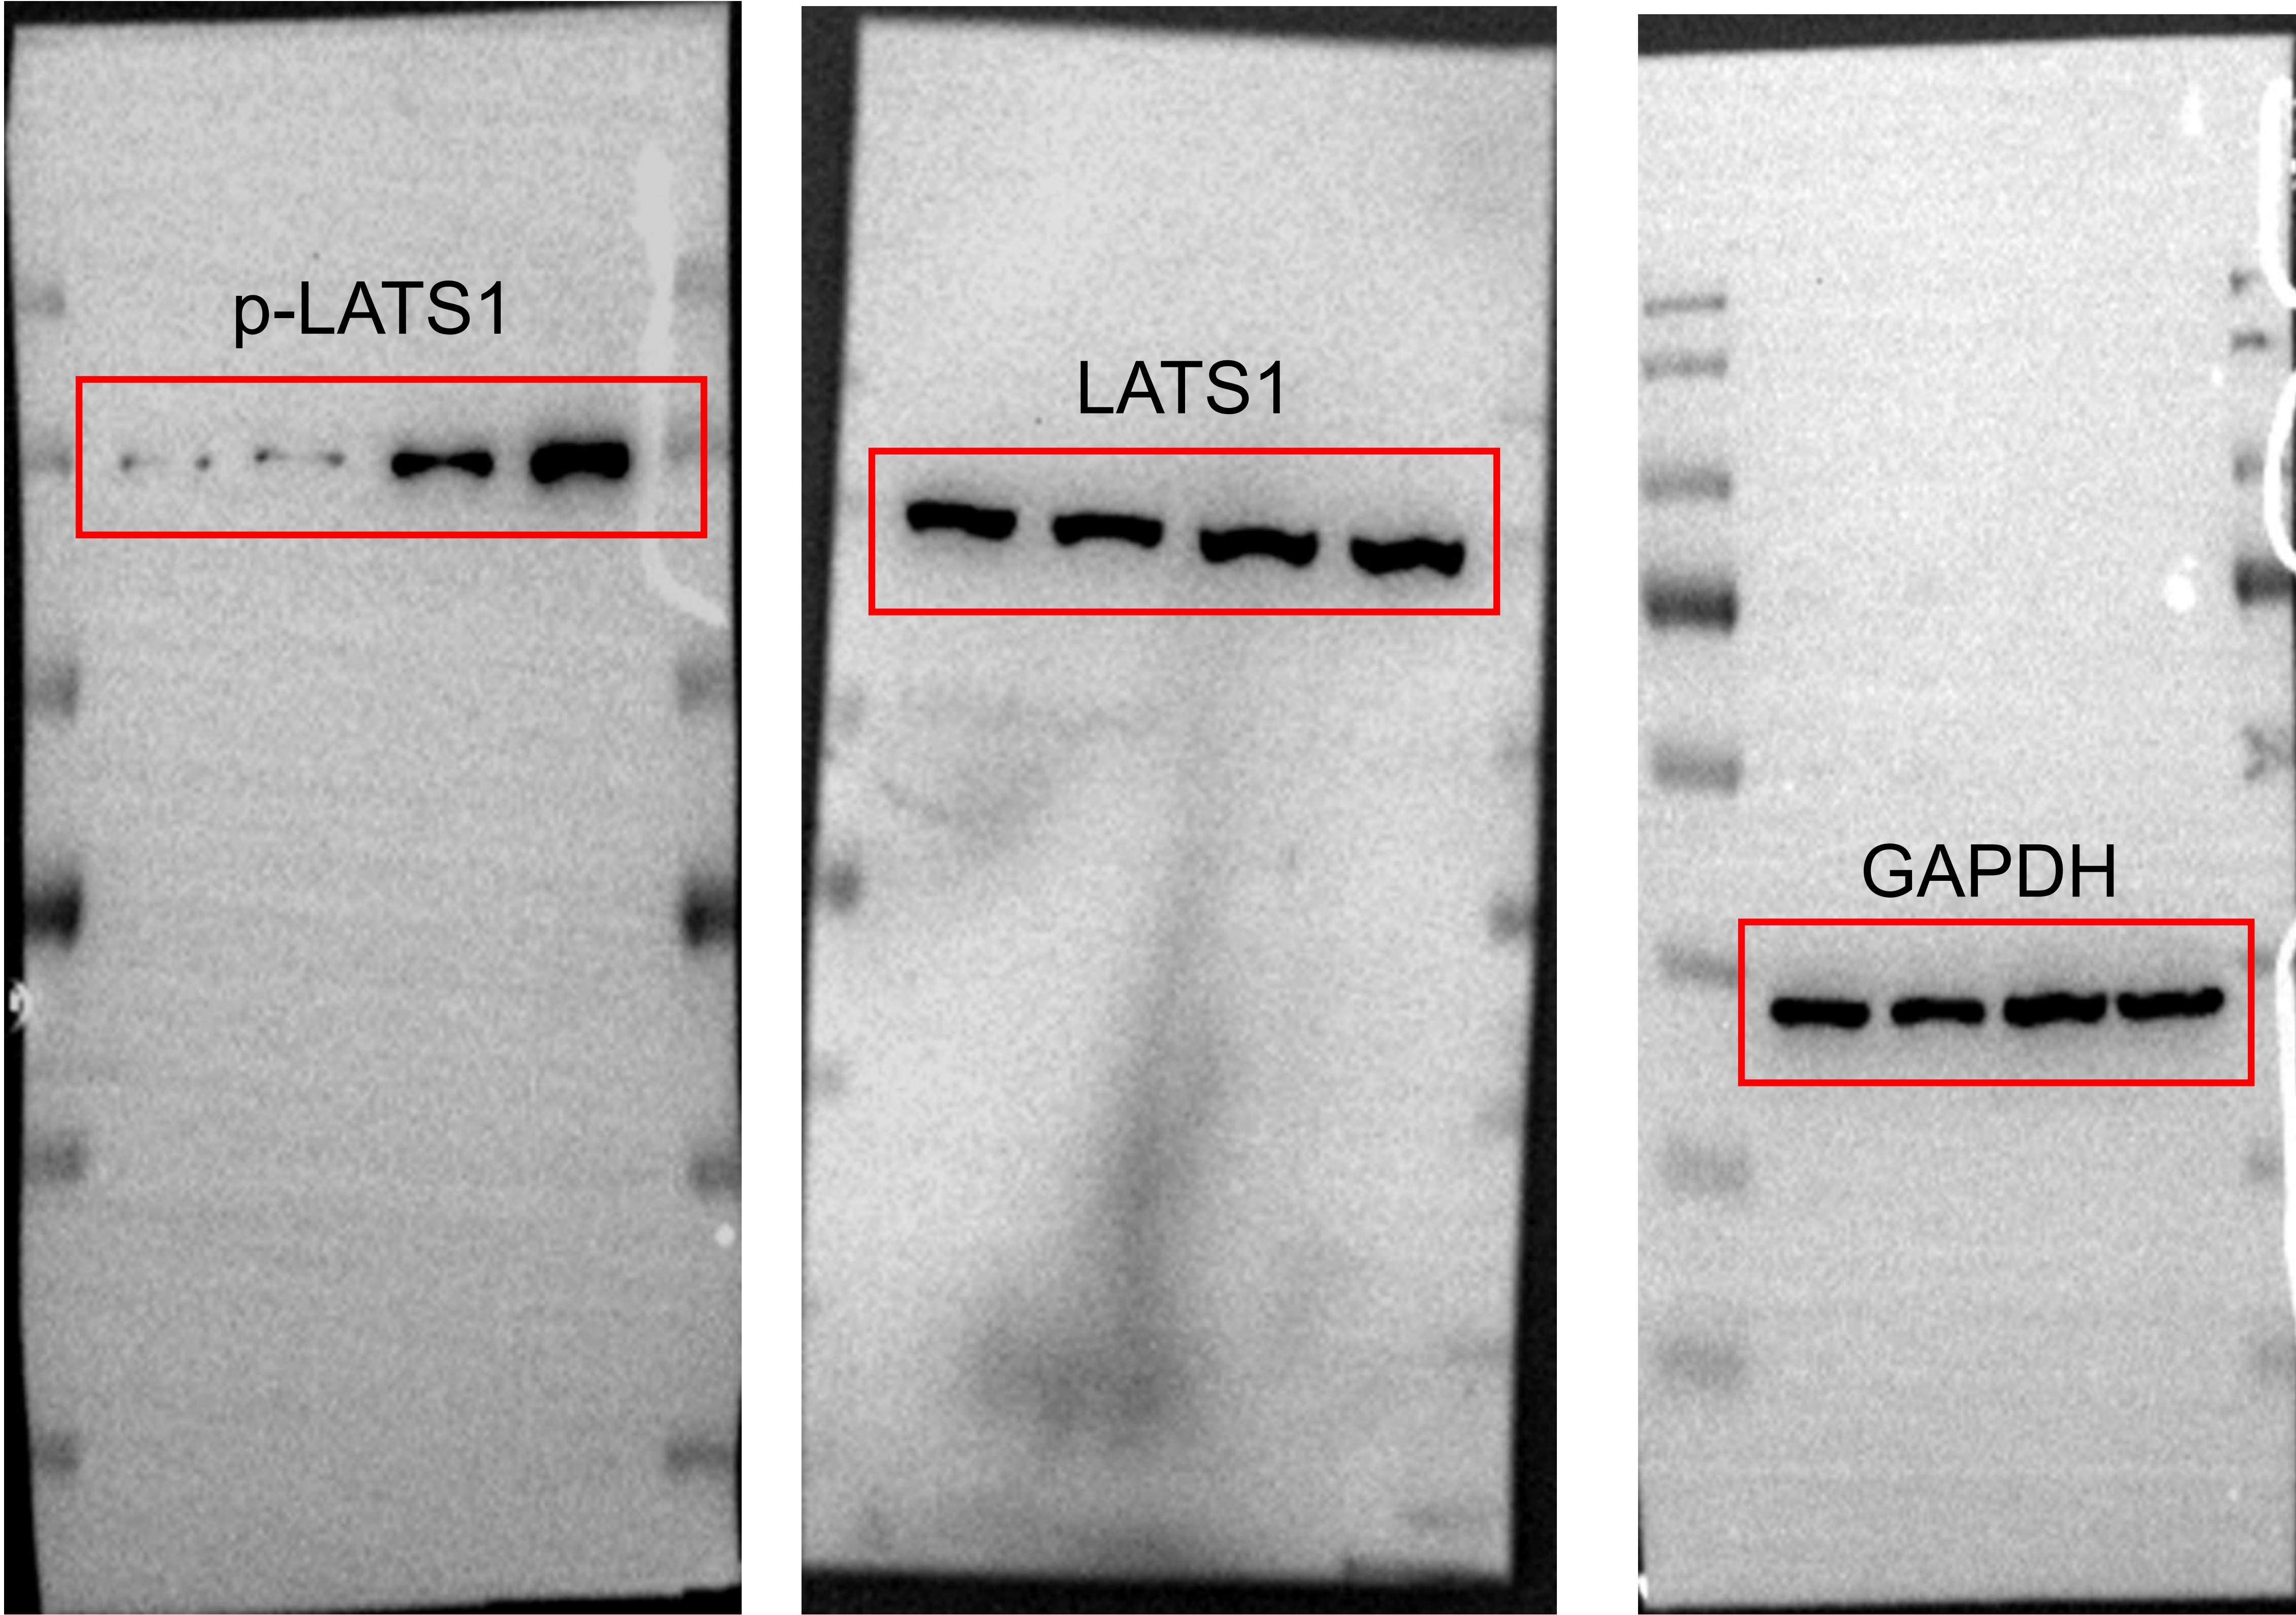

Figure 5N

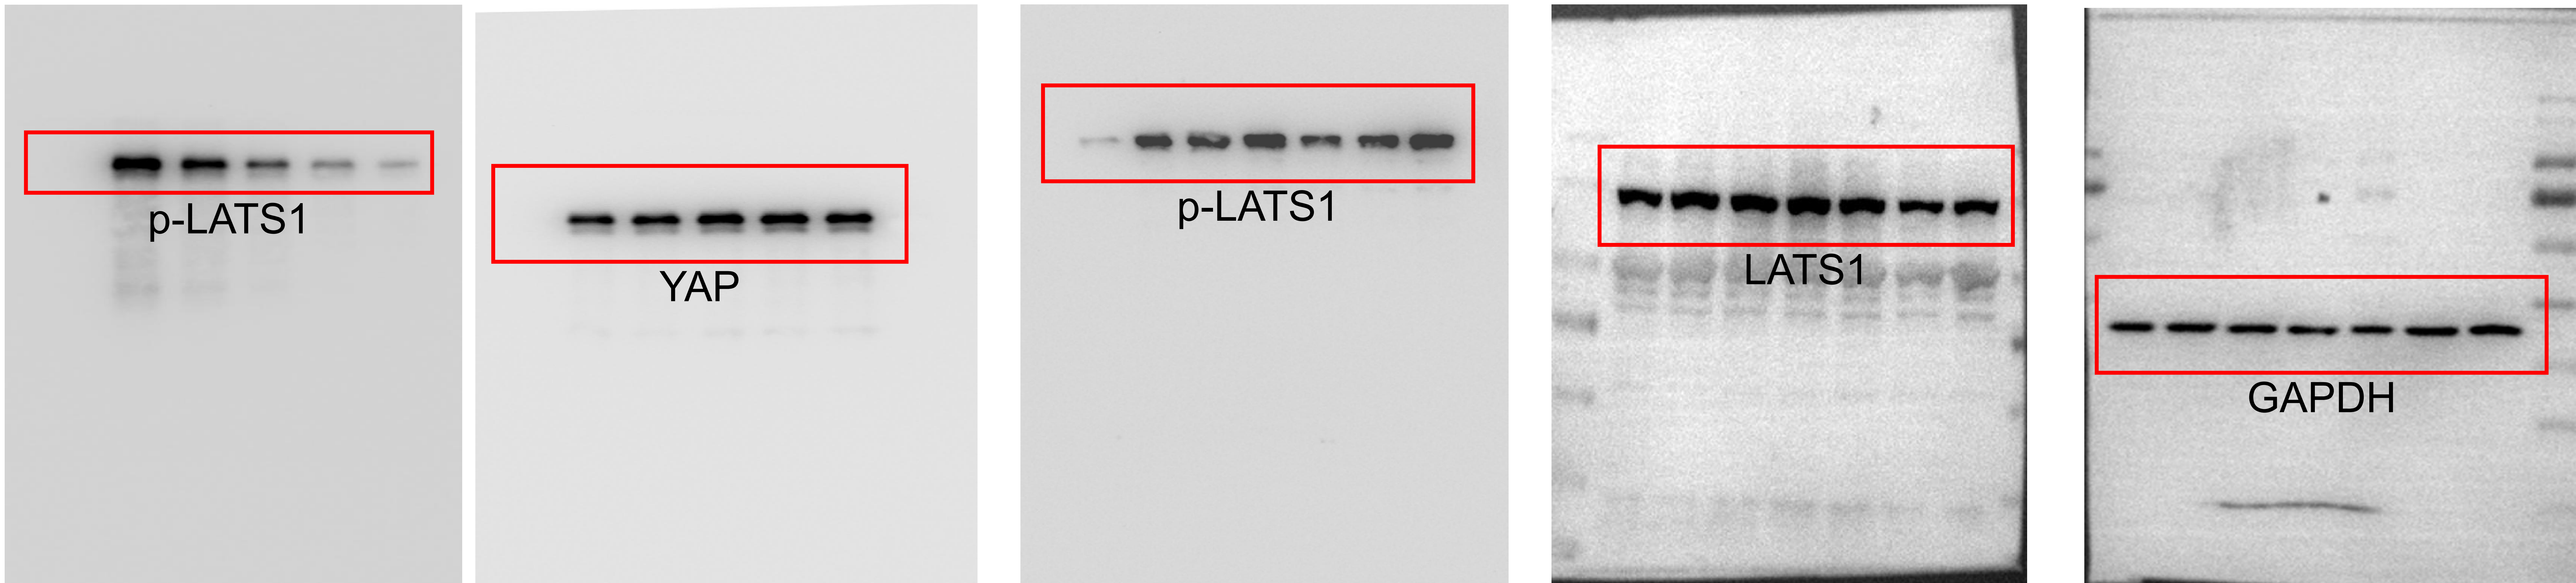



Figure 50

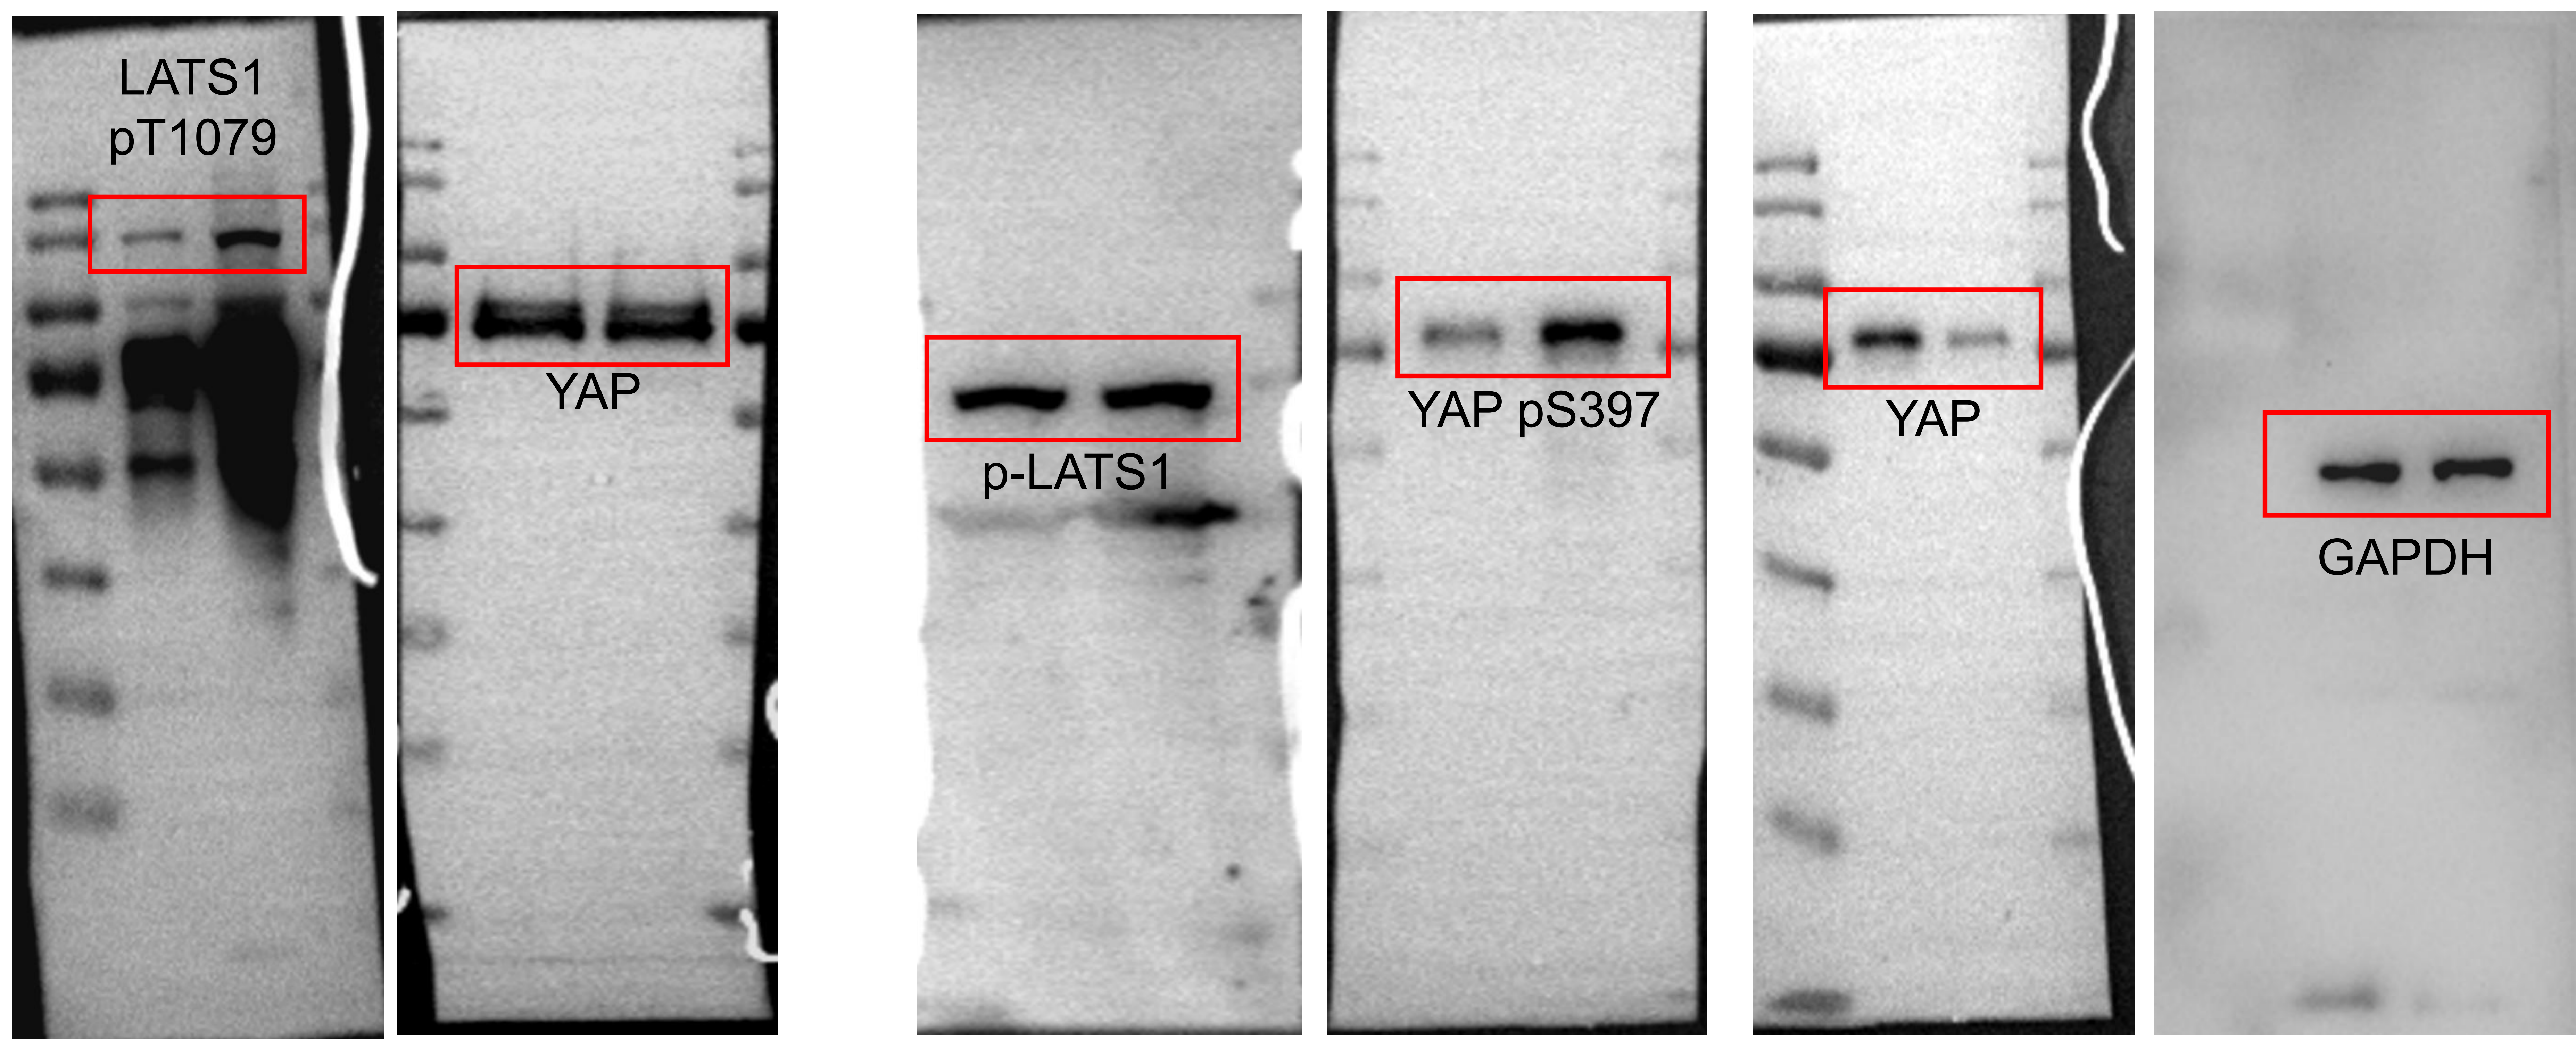

Figure S12A

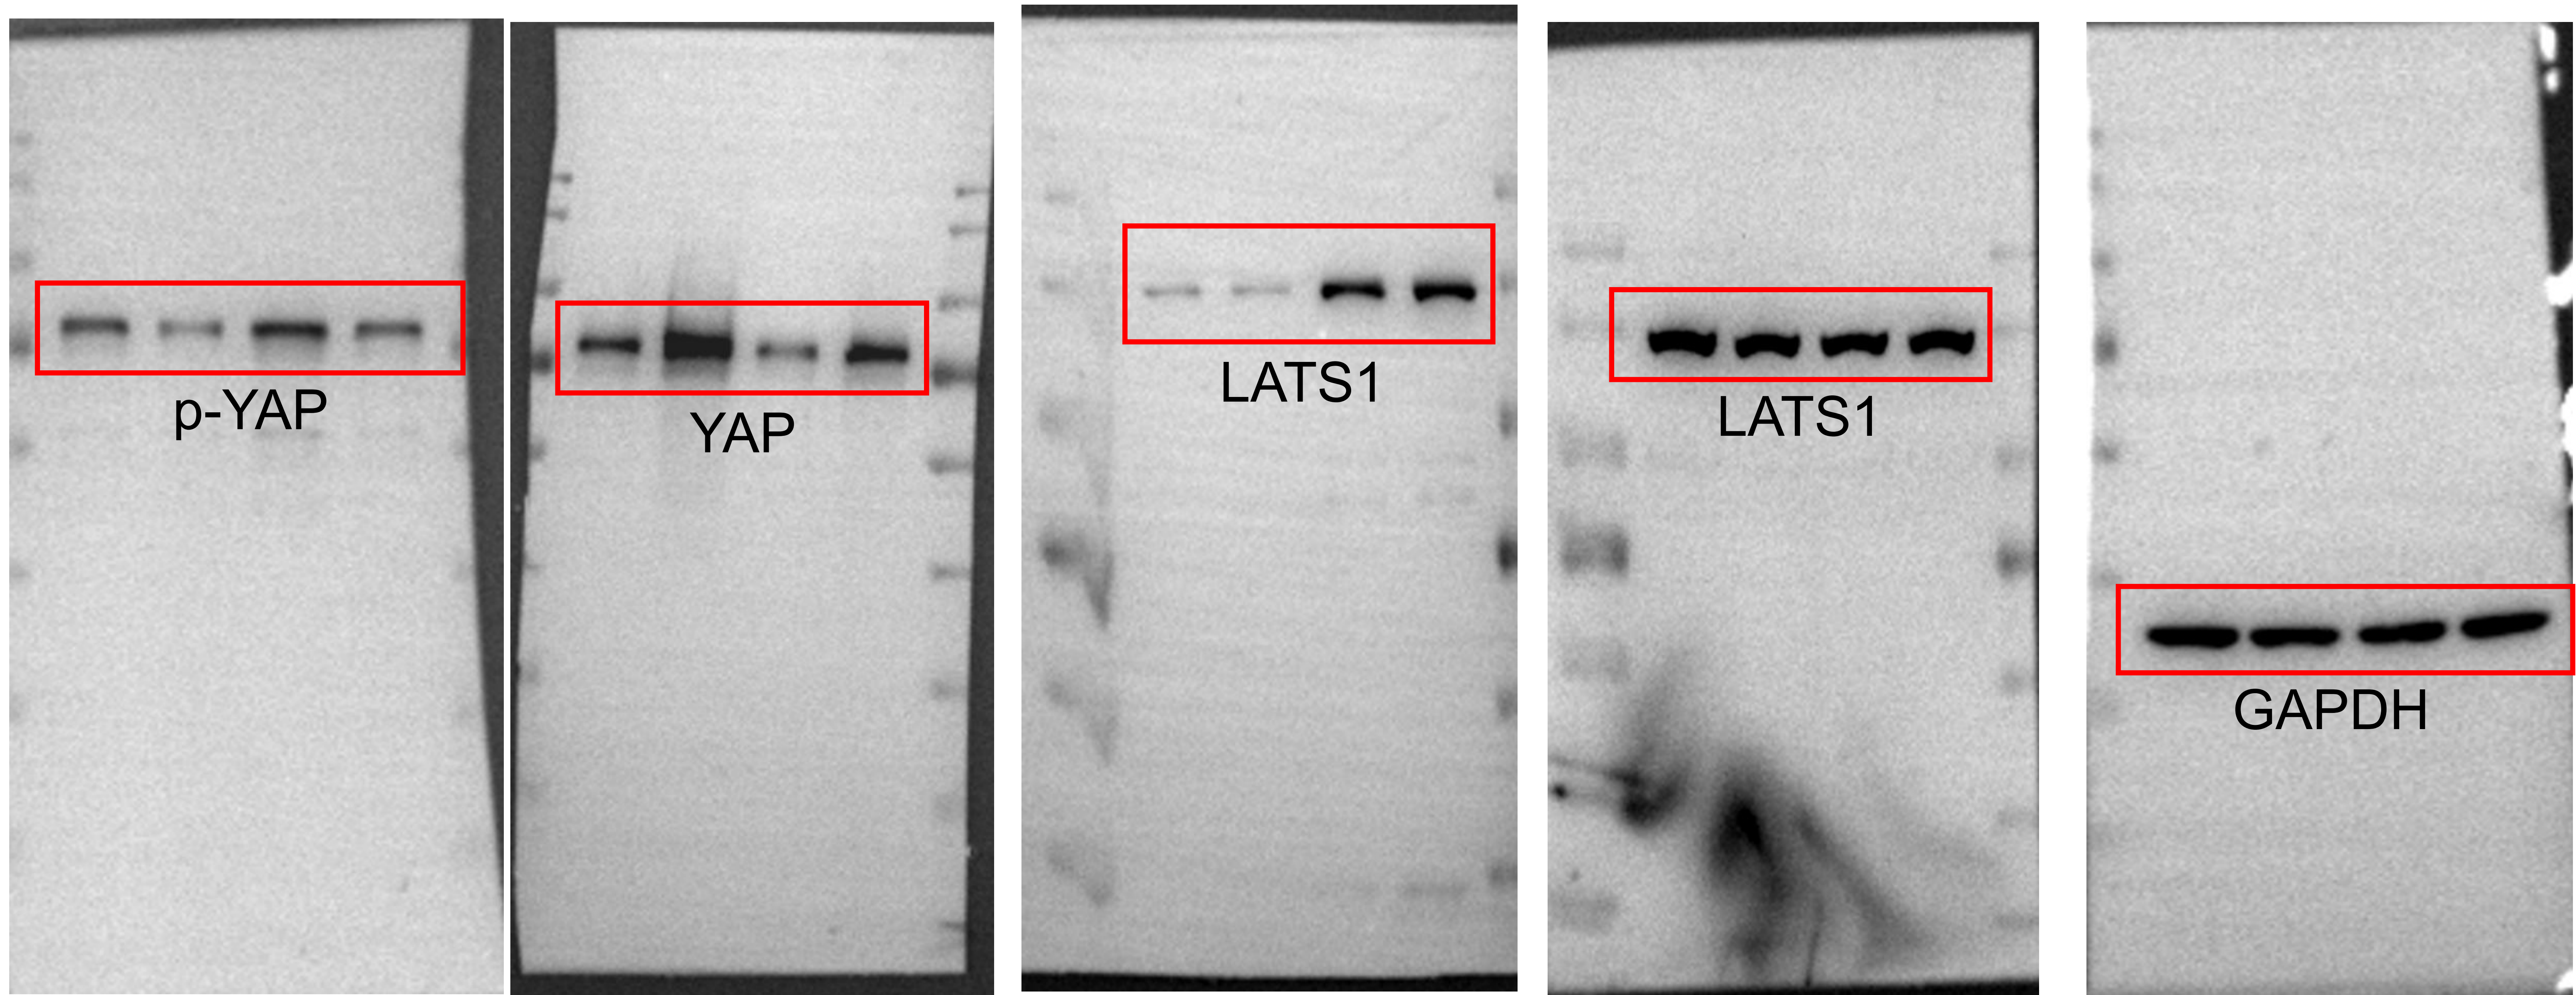

Figure S12B

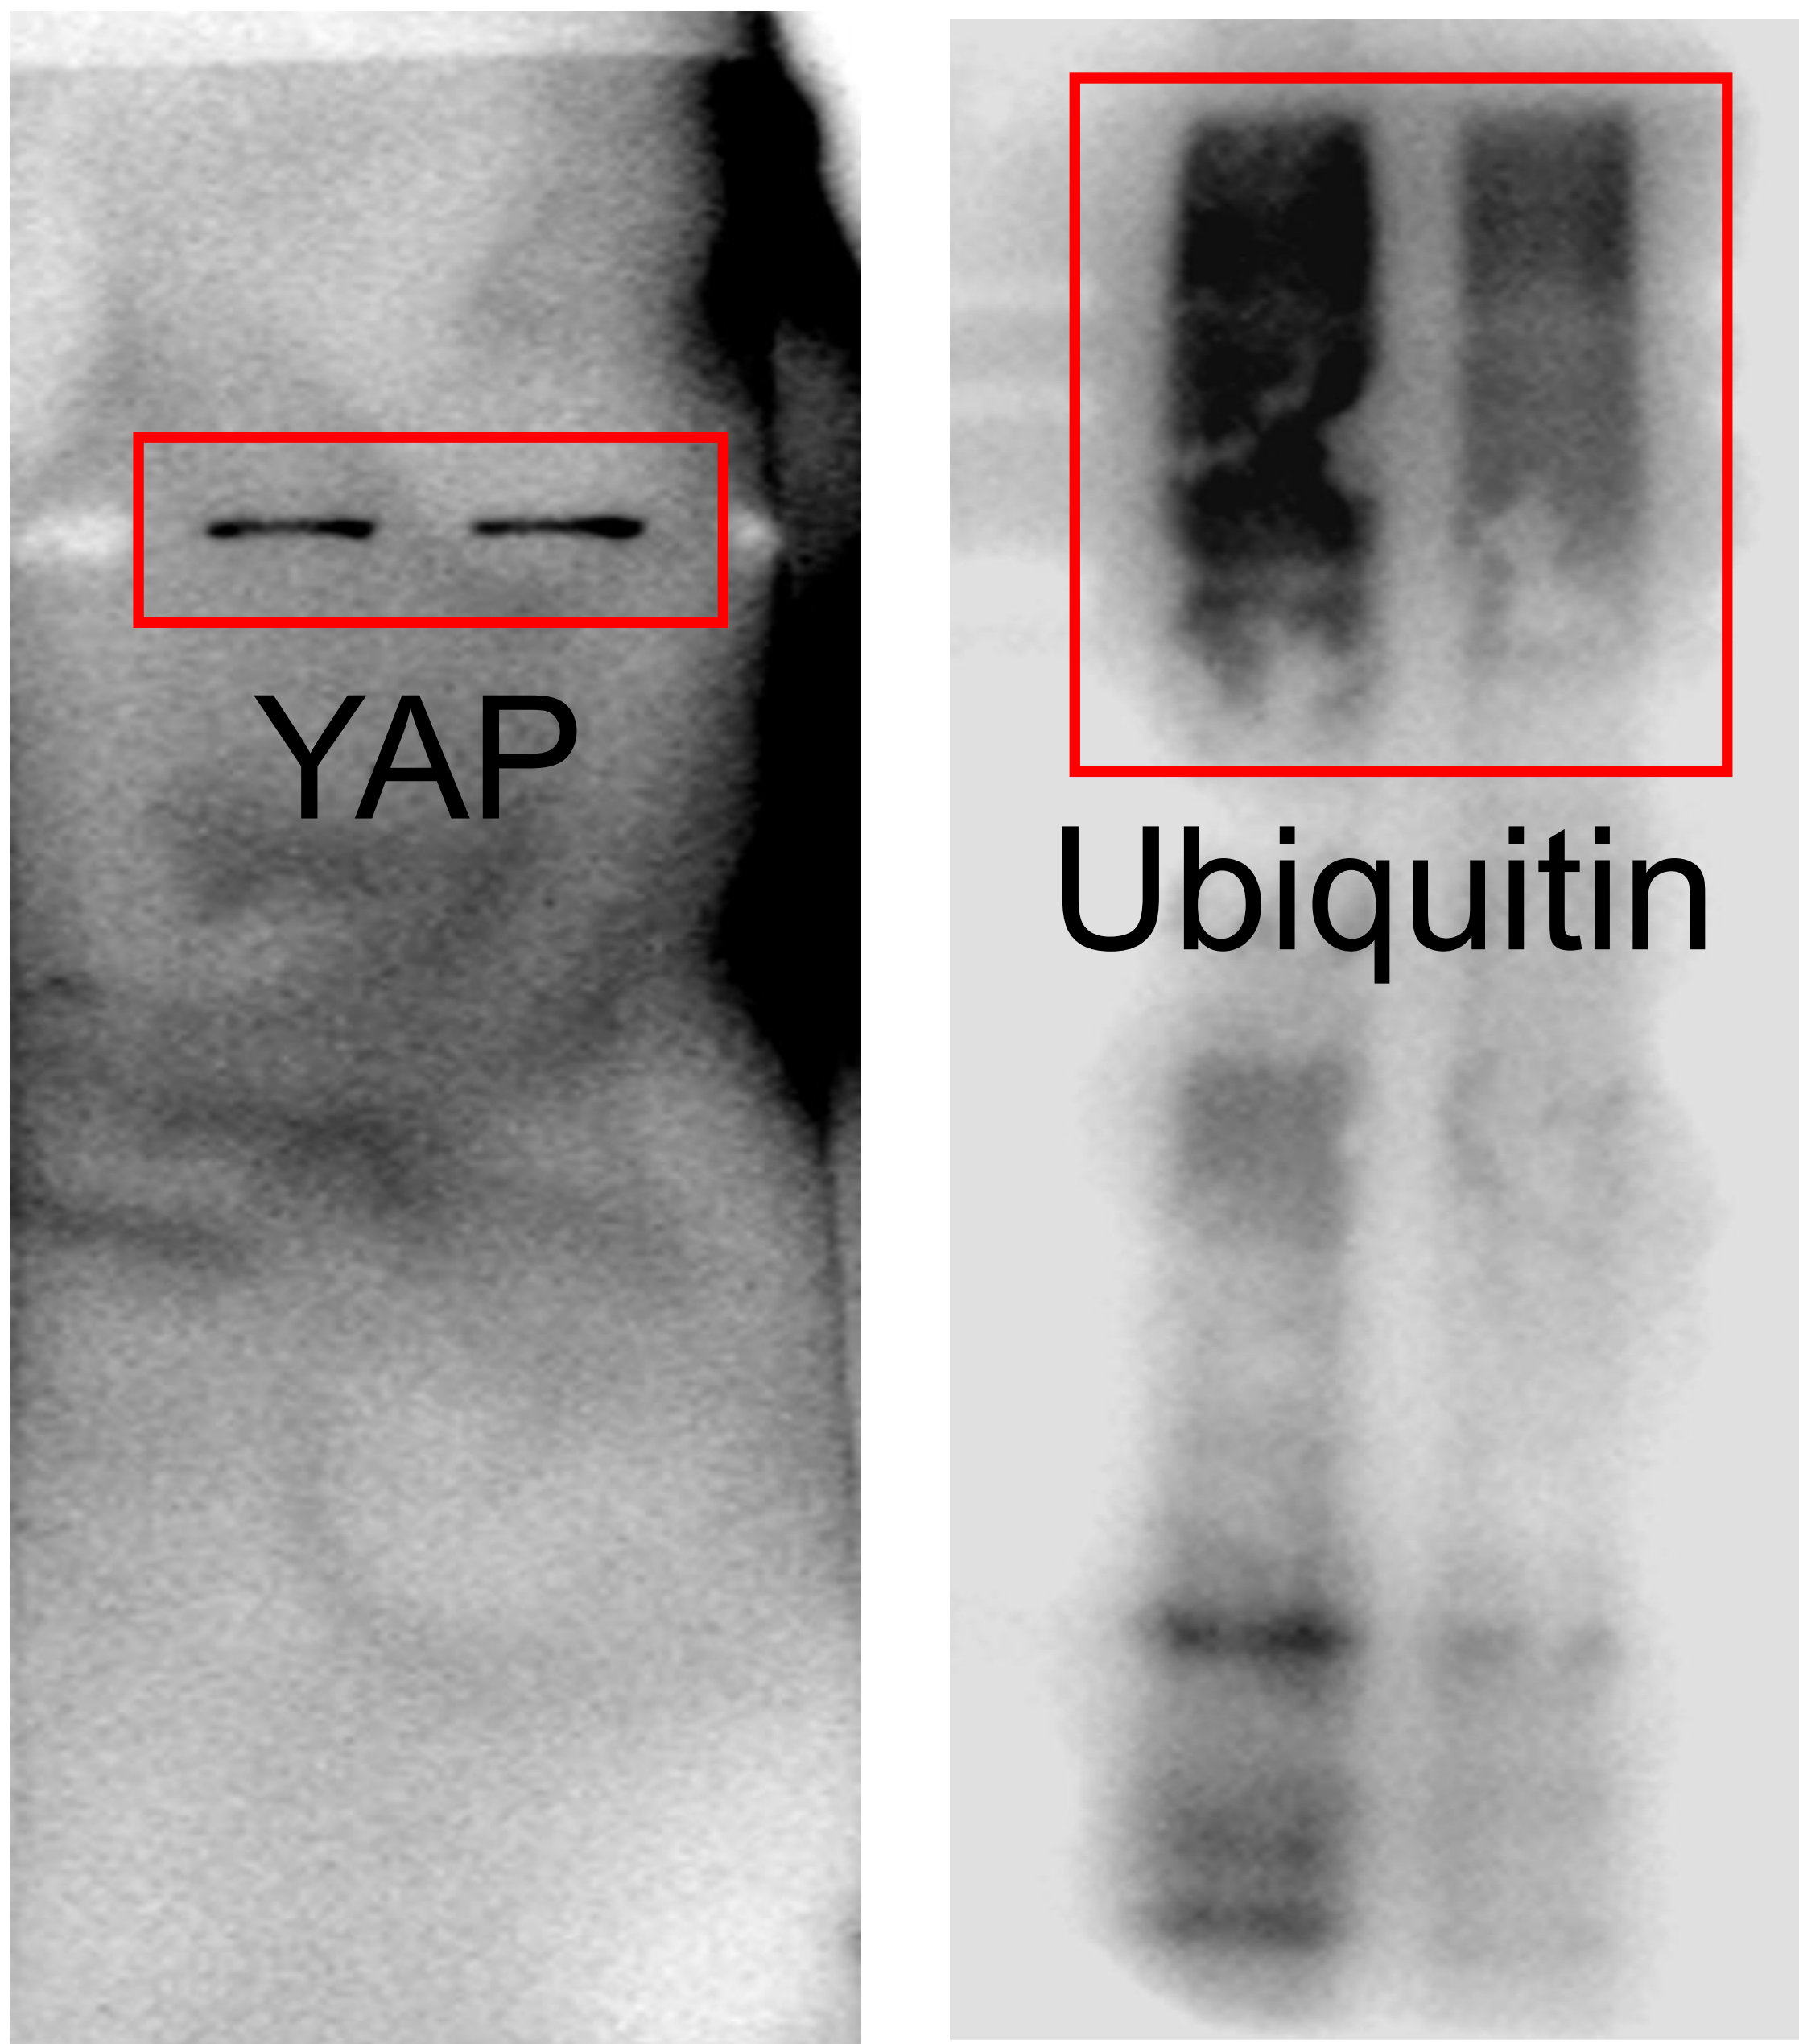

Figure S12C

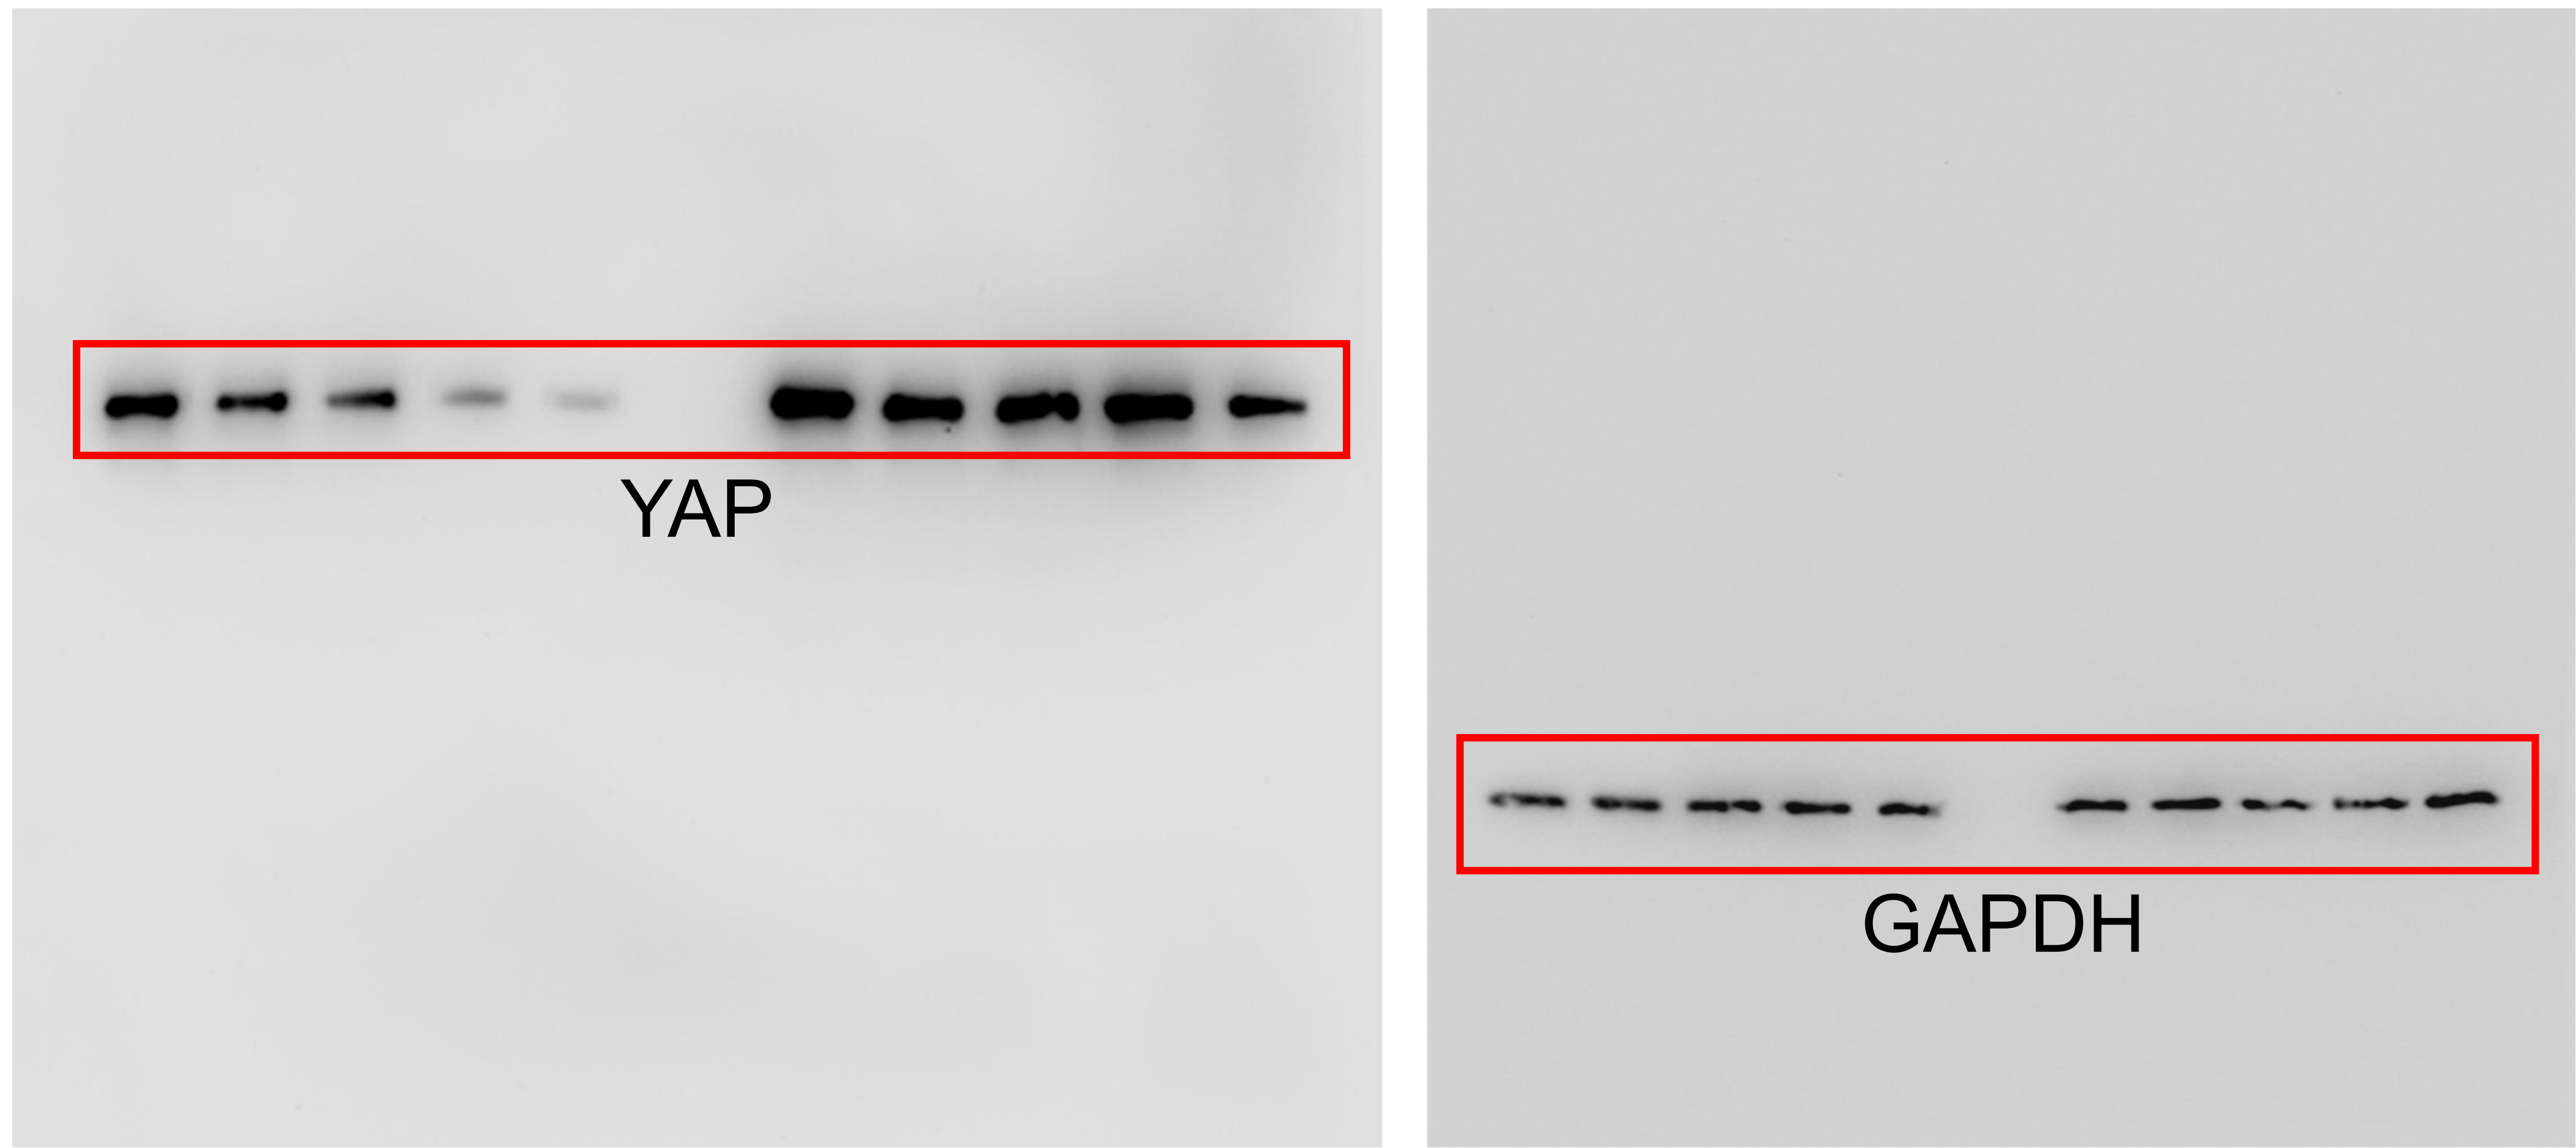



Figure S13

S1PR1 siRNA

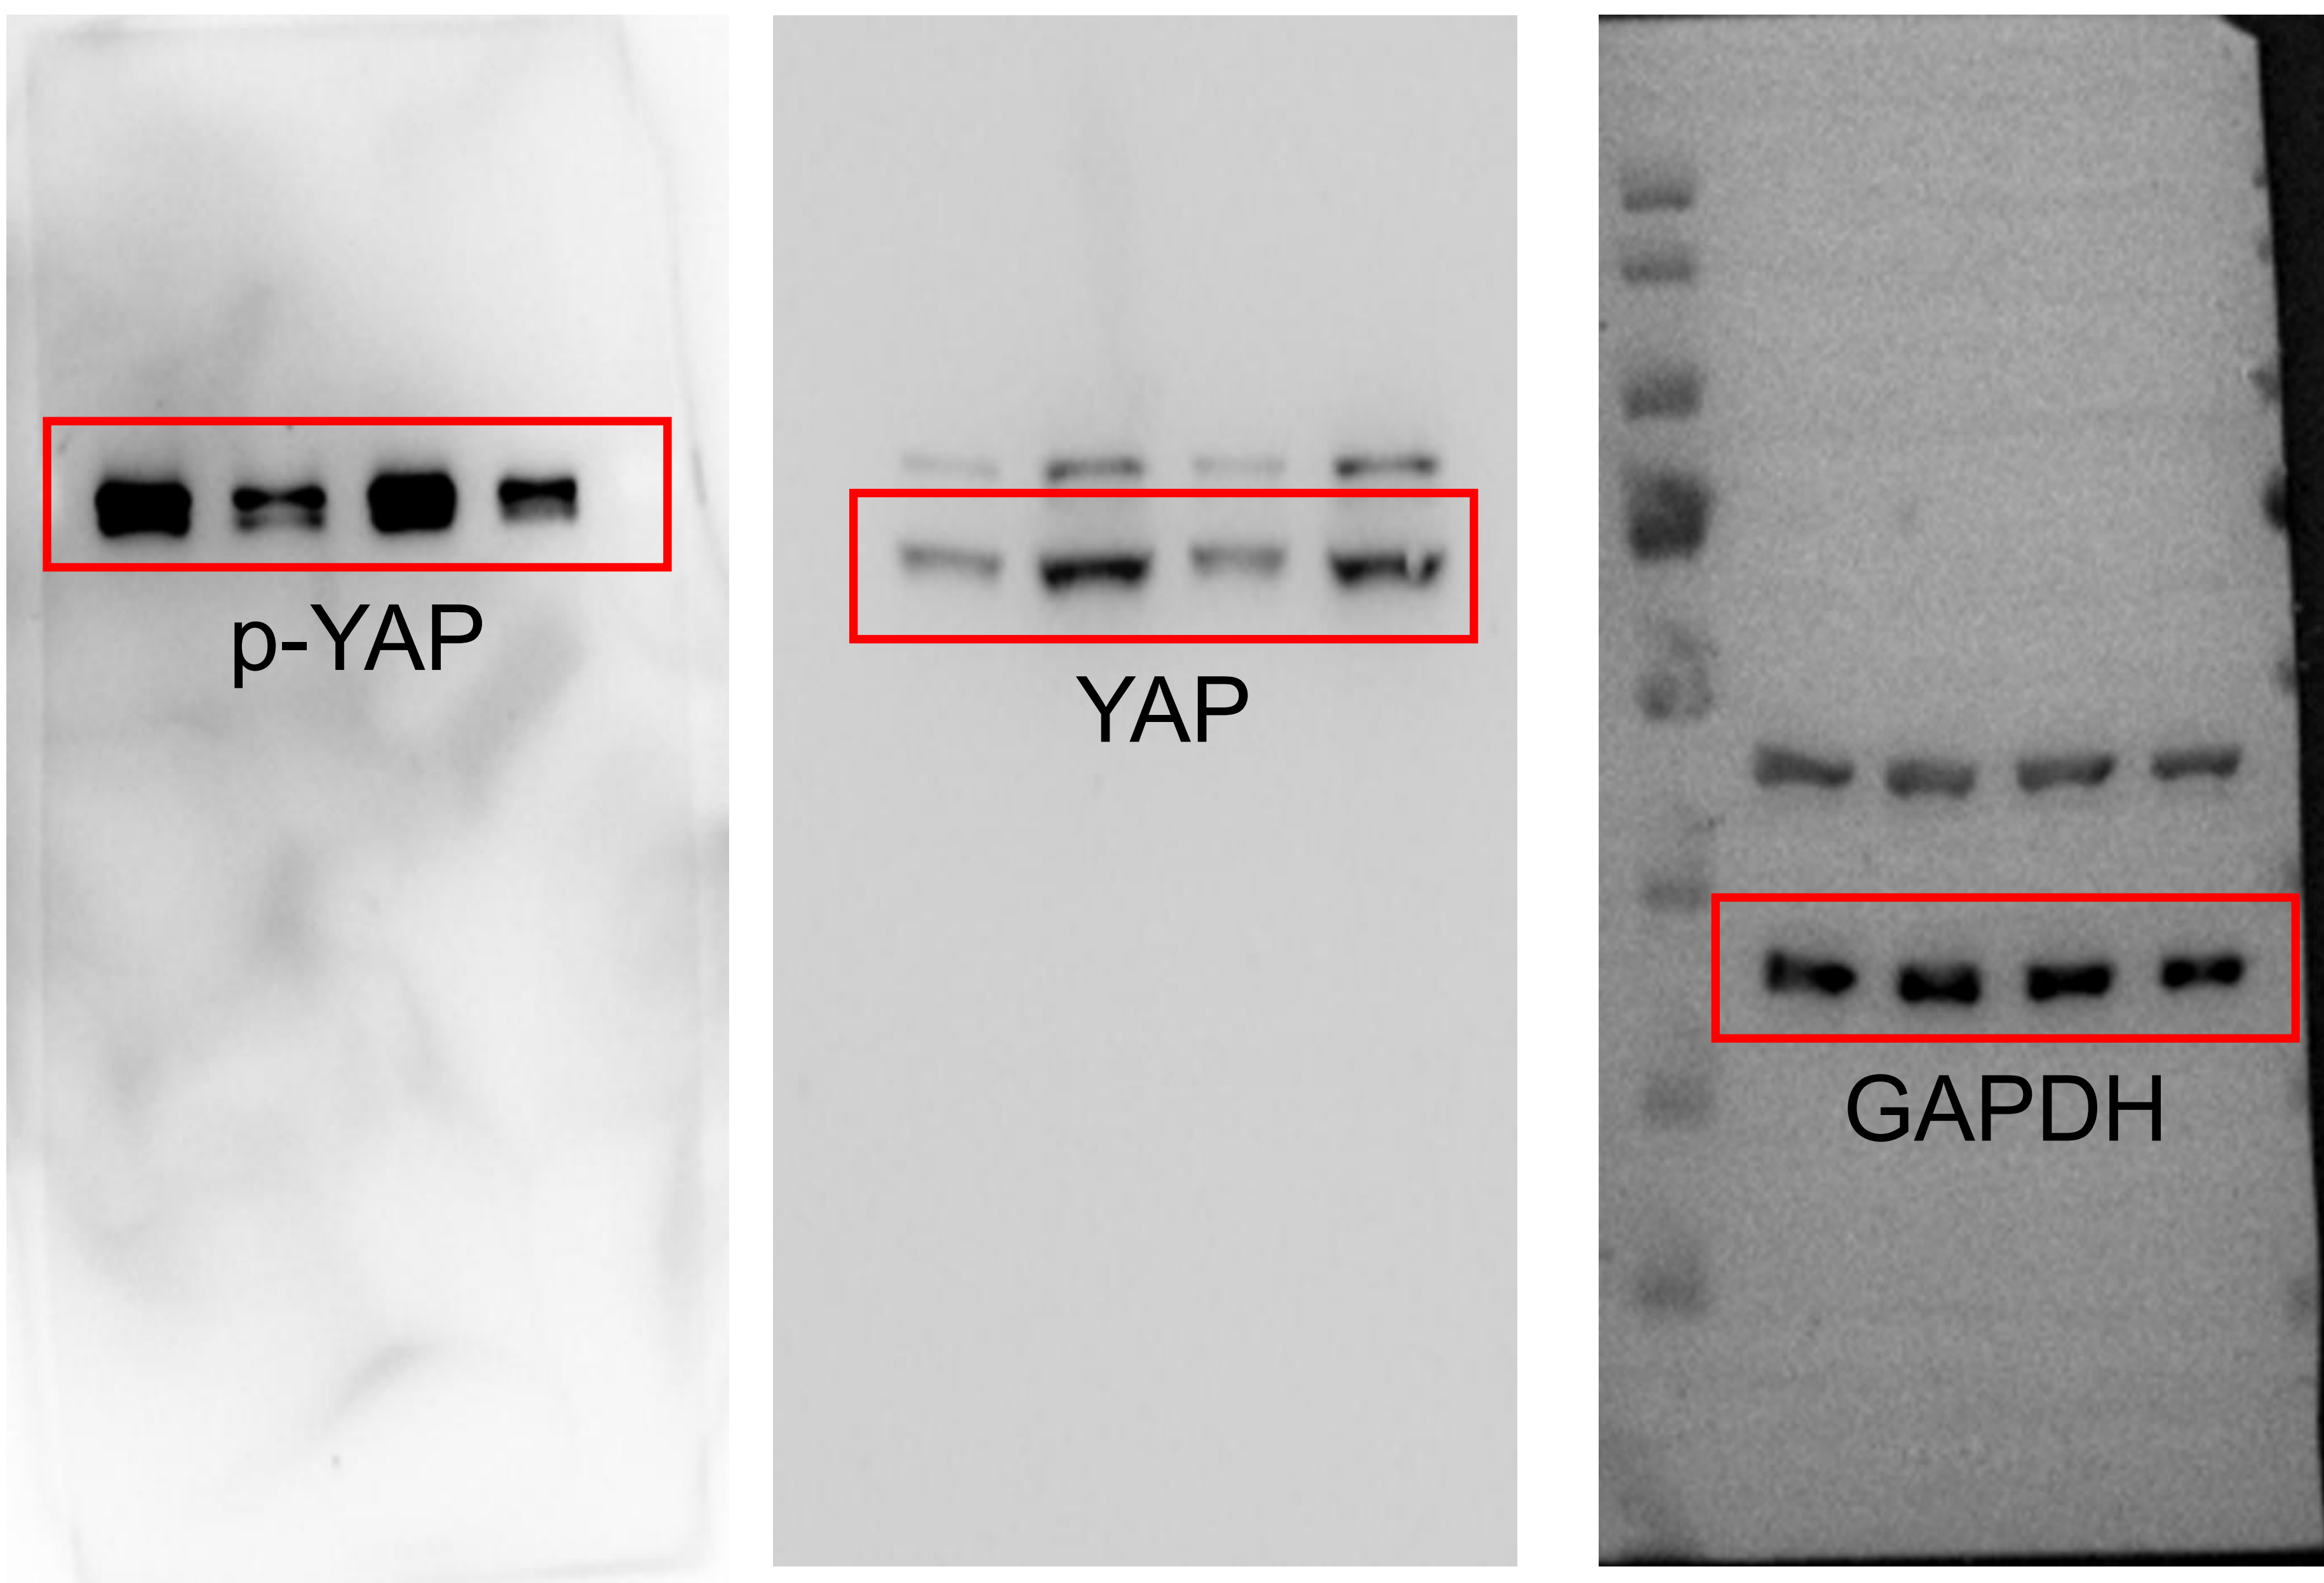

S1PR2 siRNA

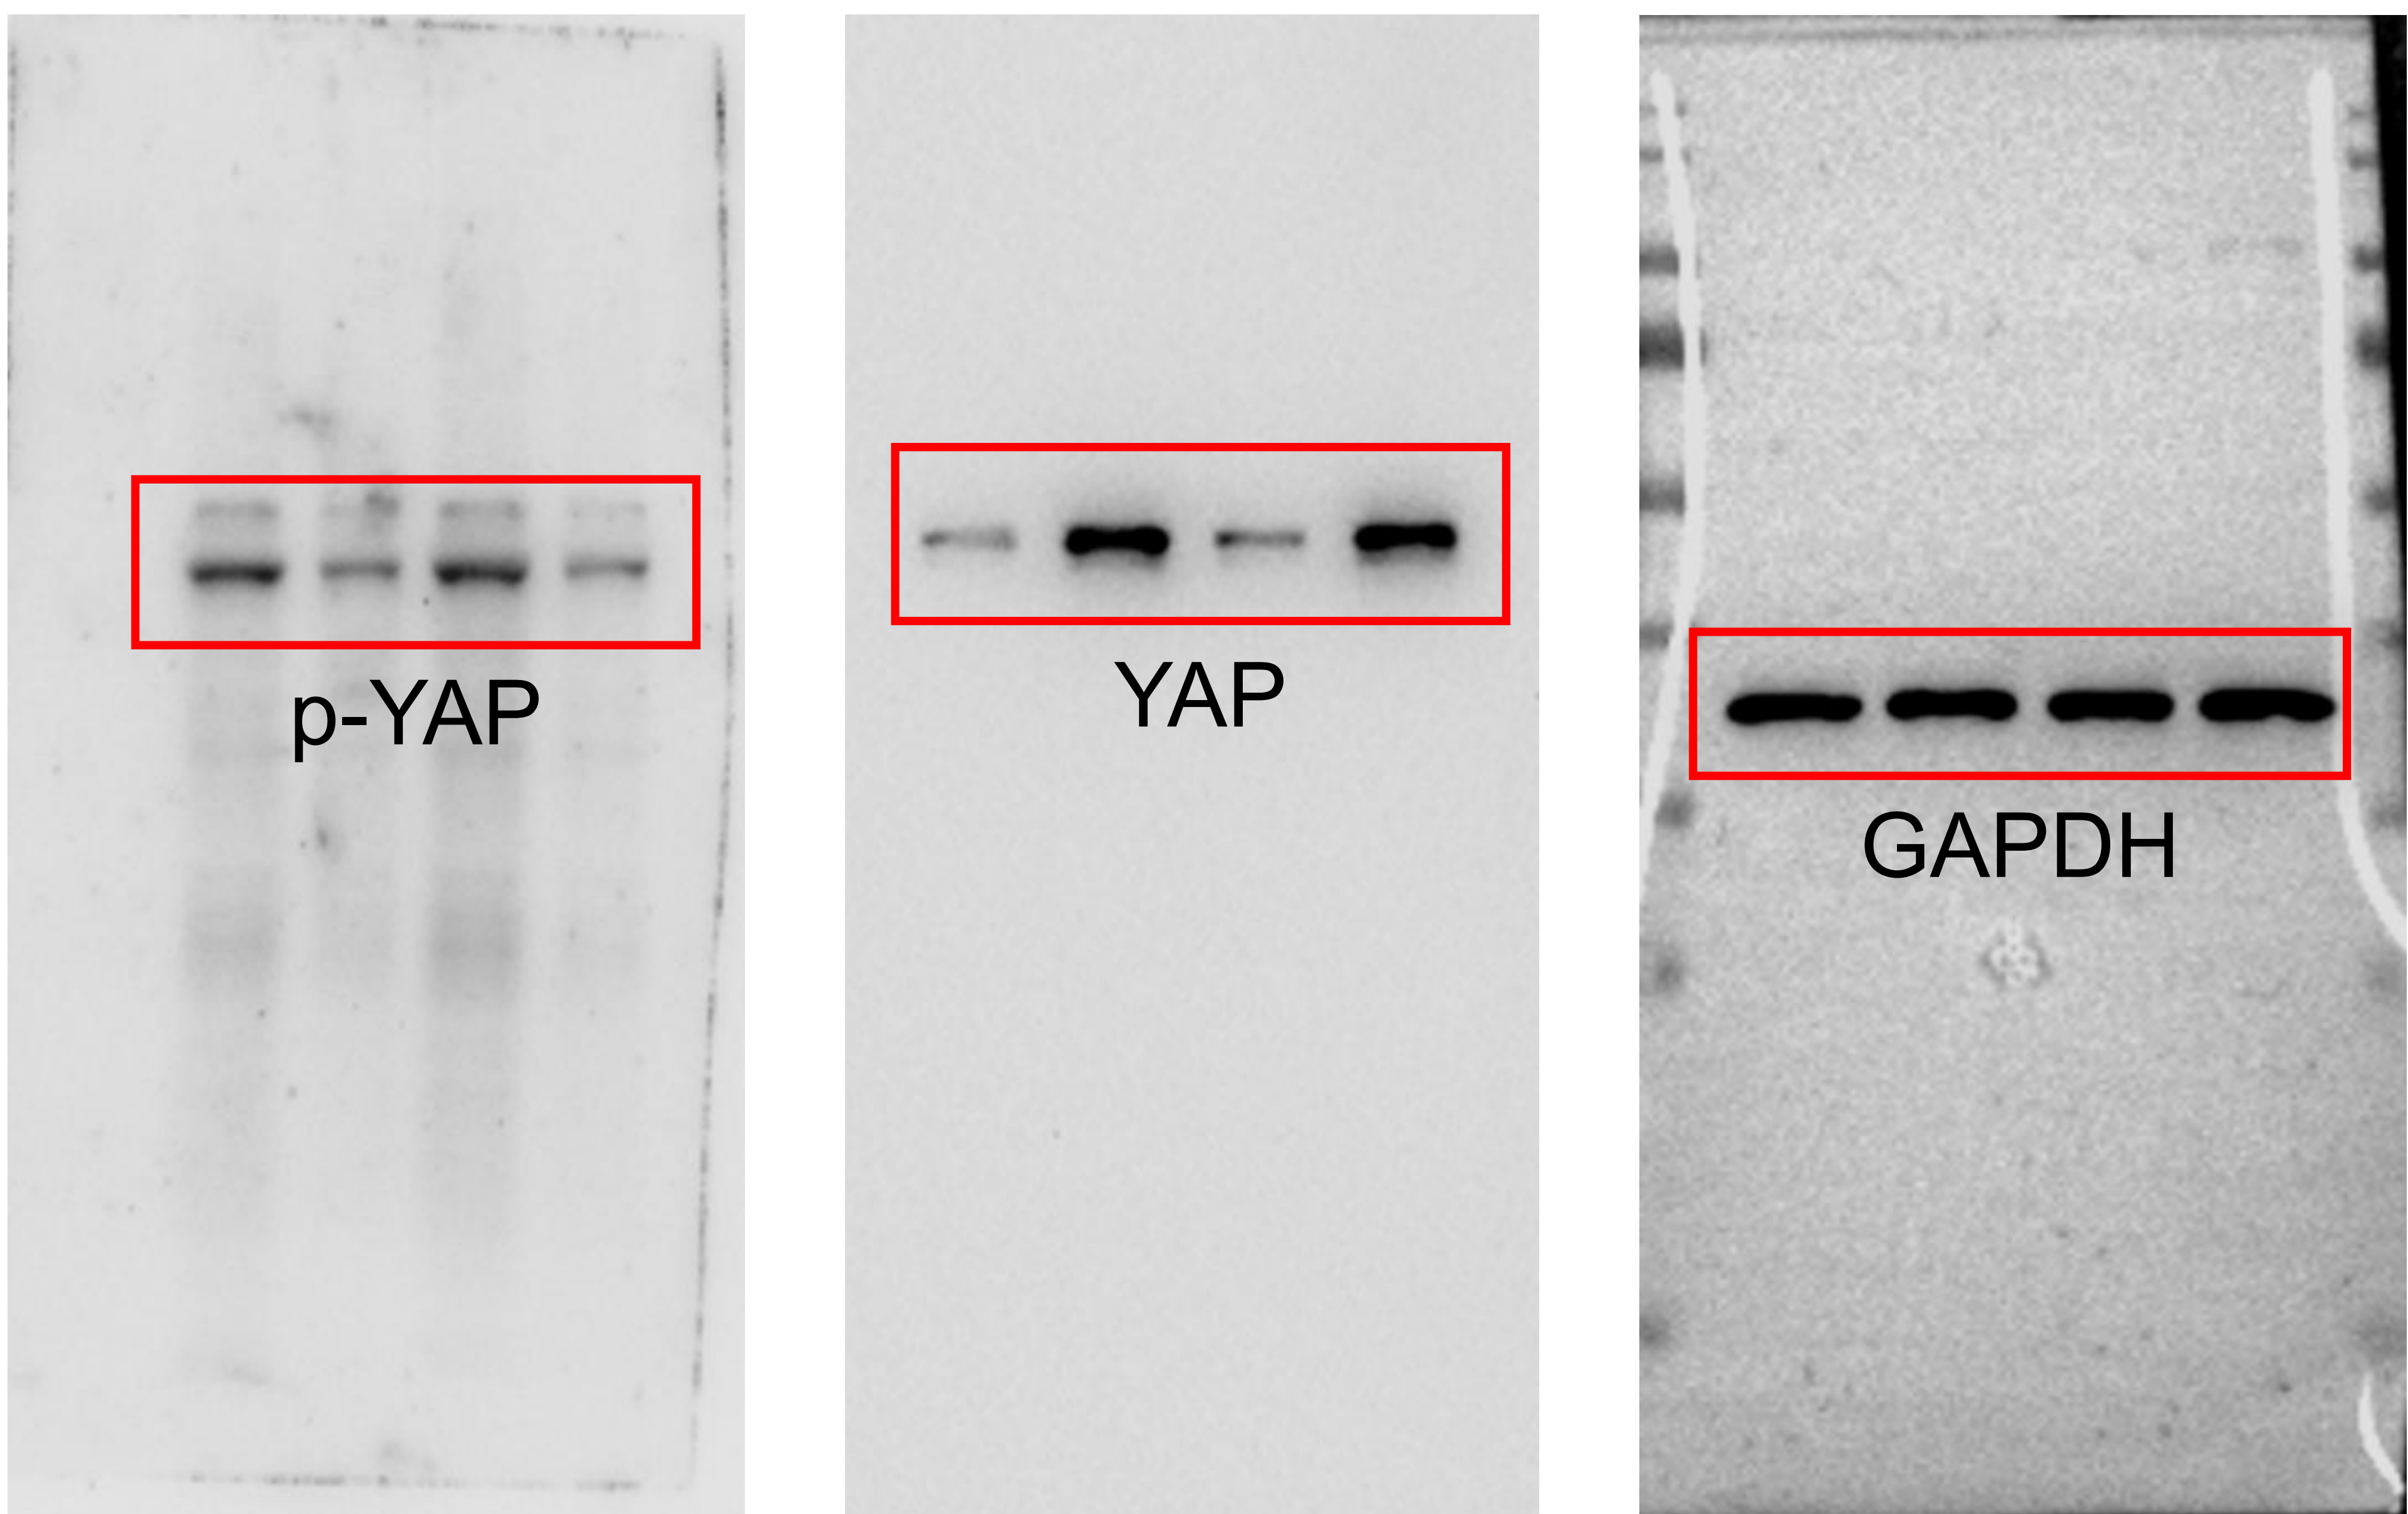

S1PR3 siRNA

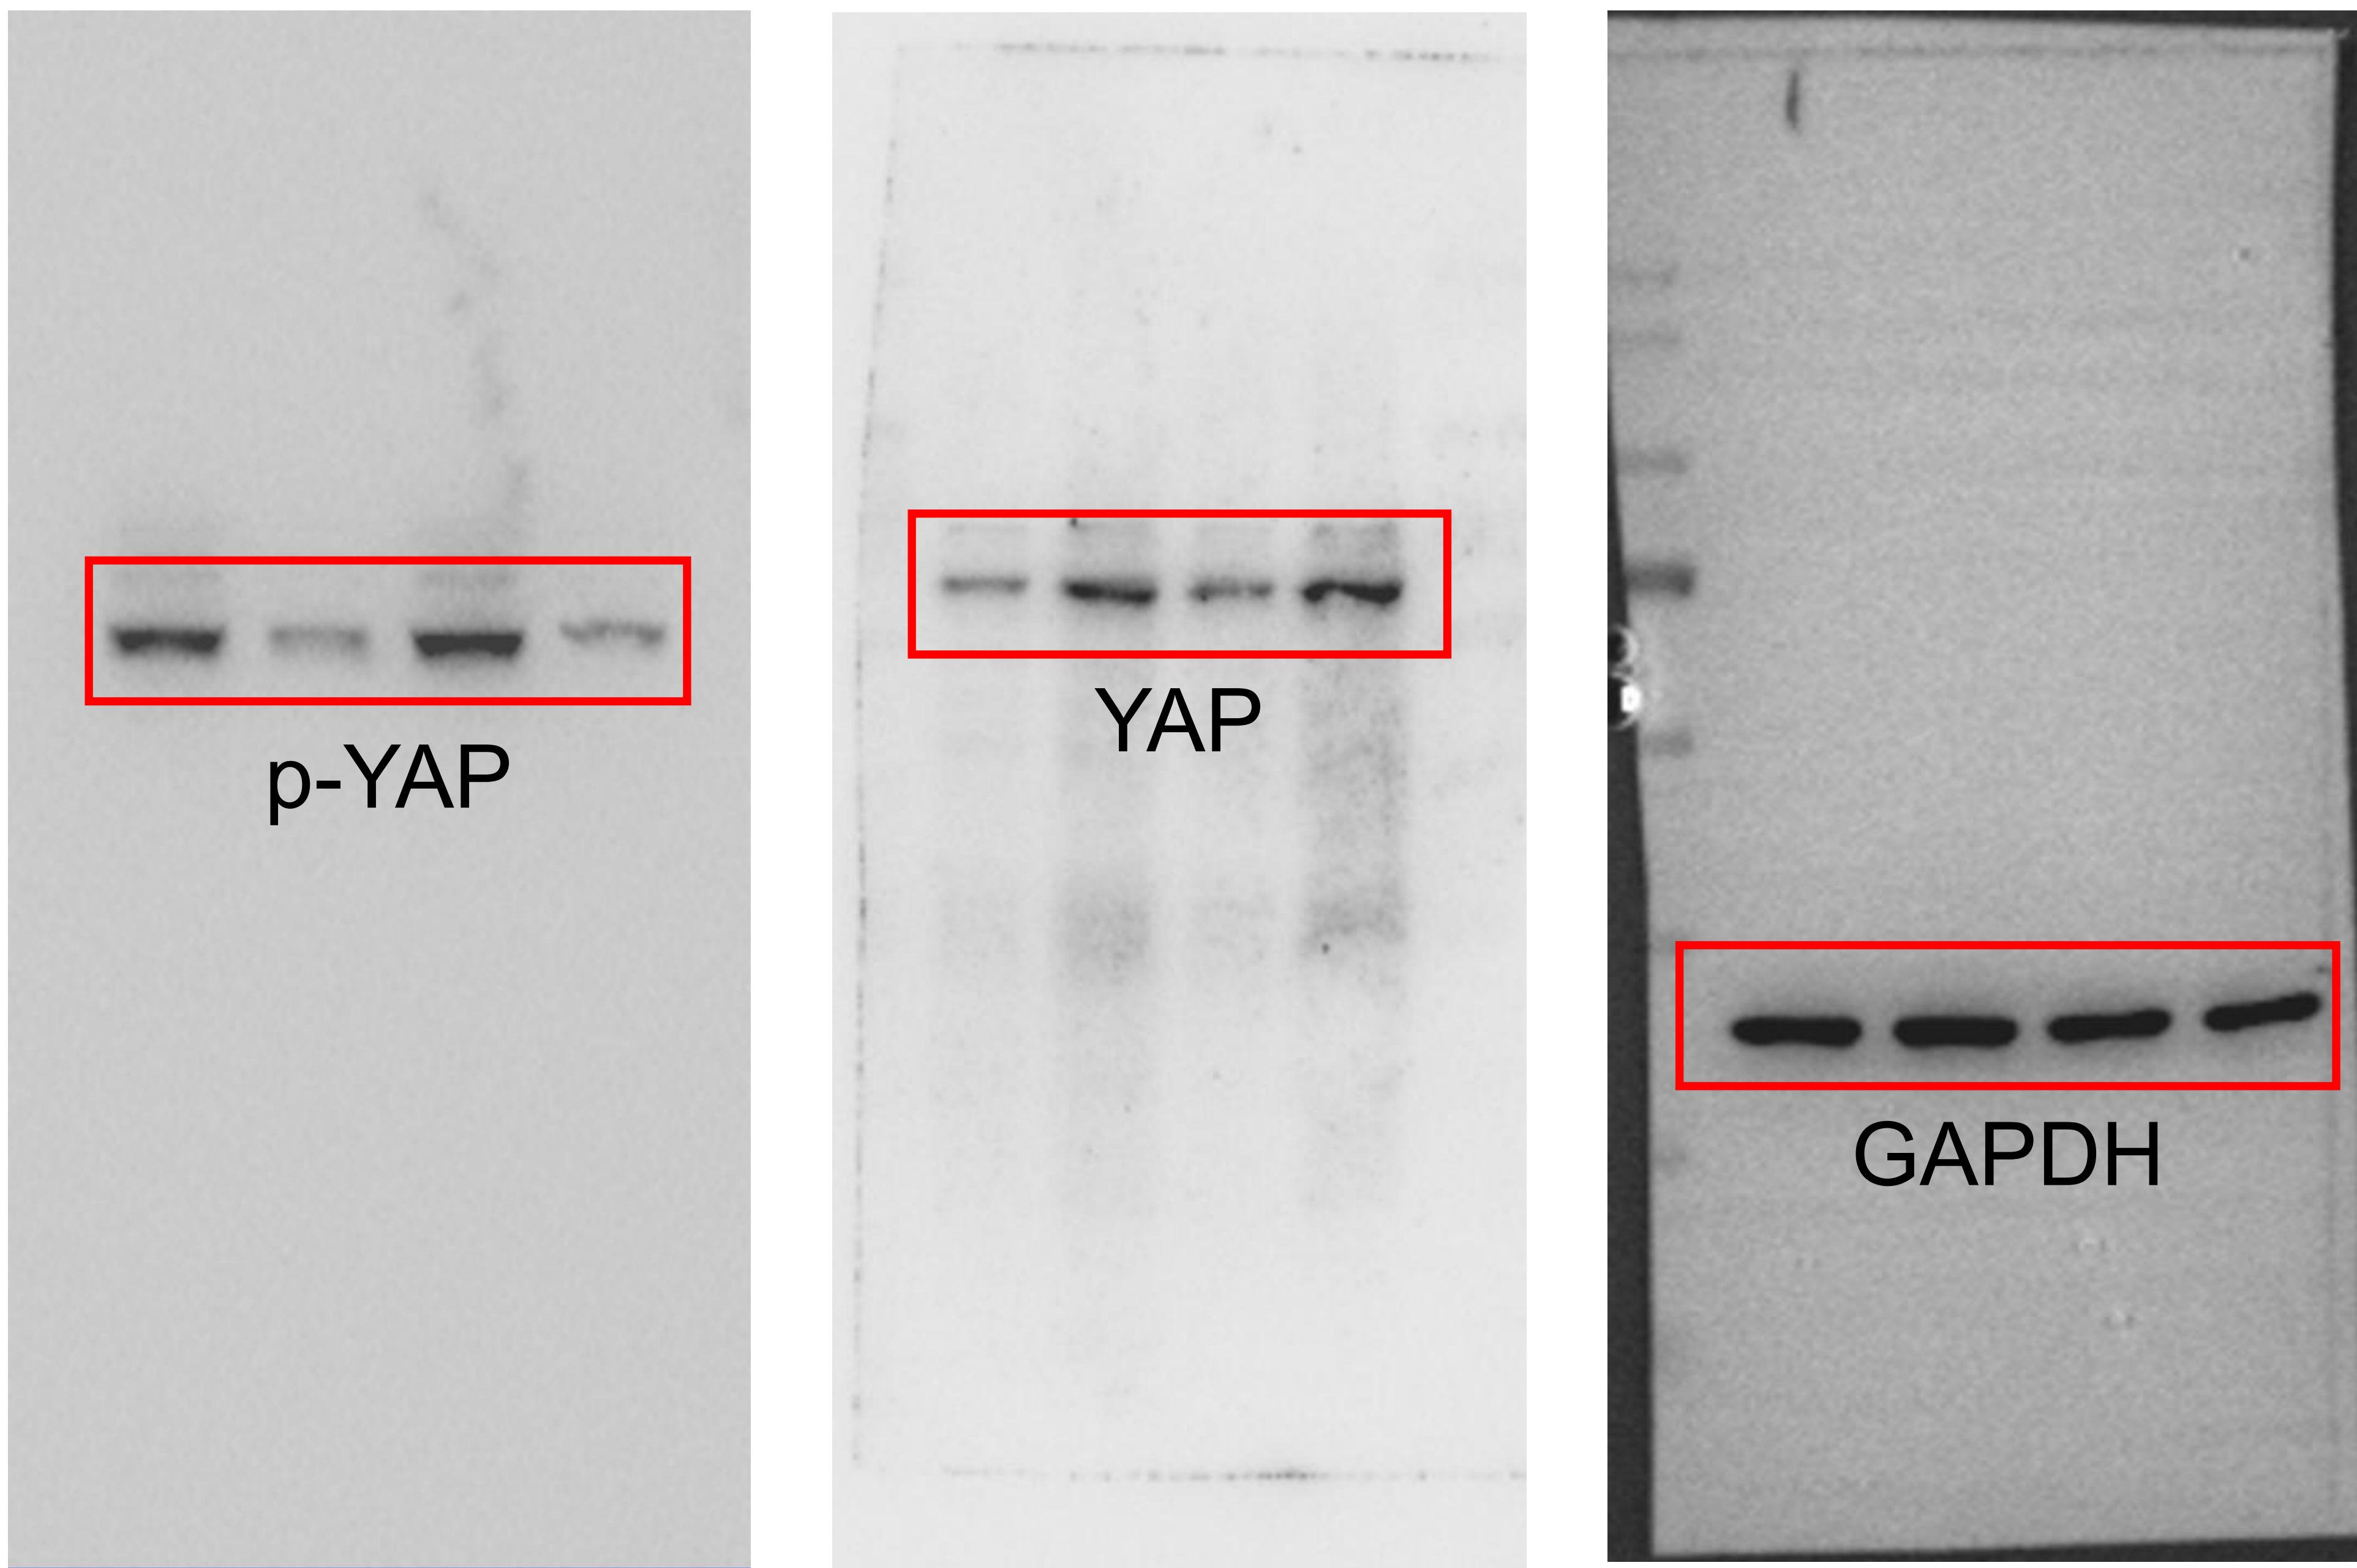

S1PR4 siRNA

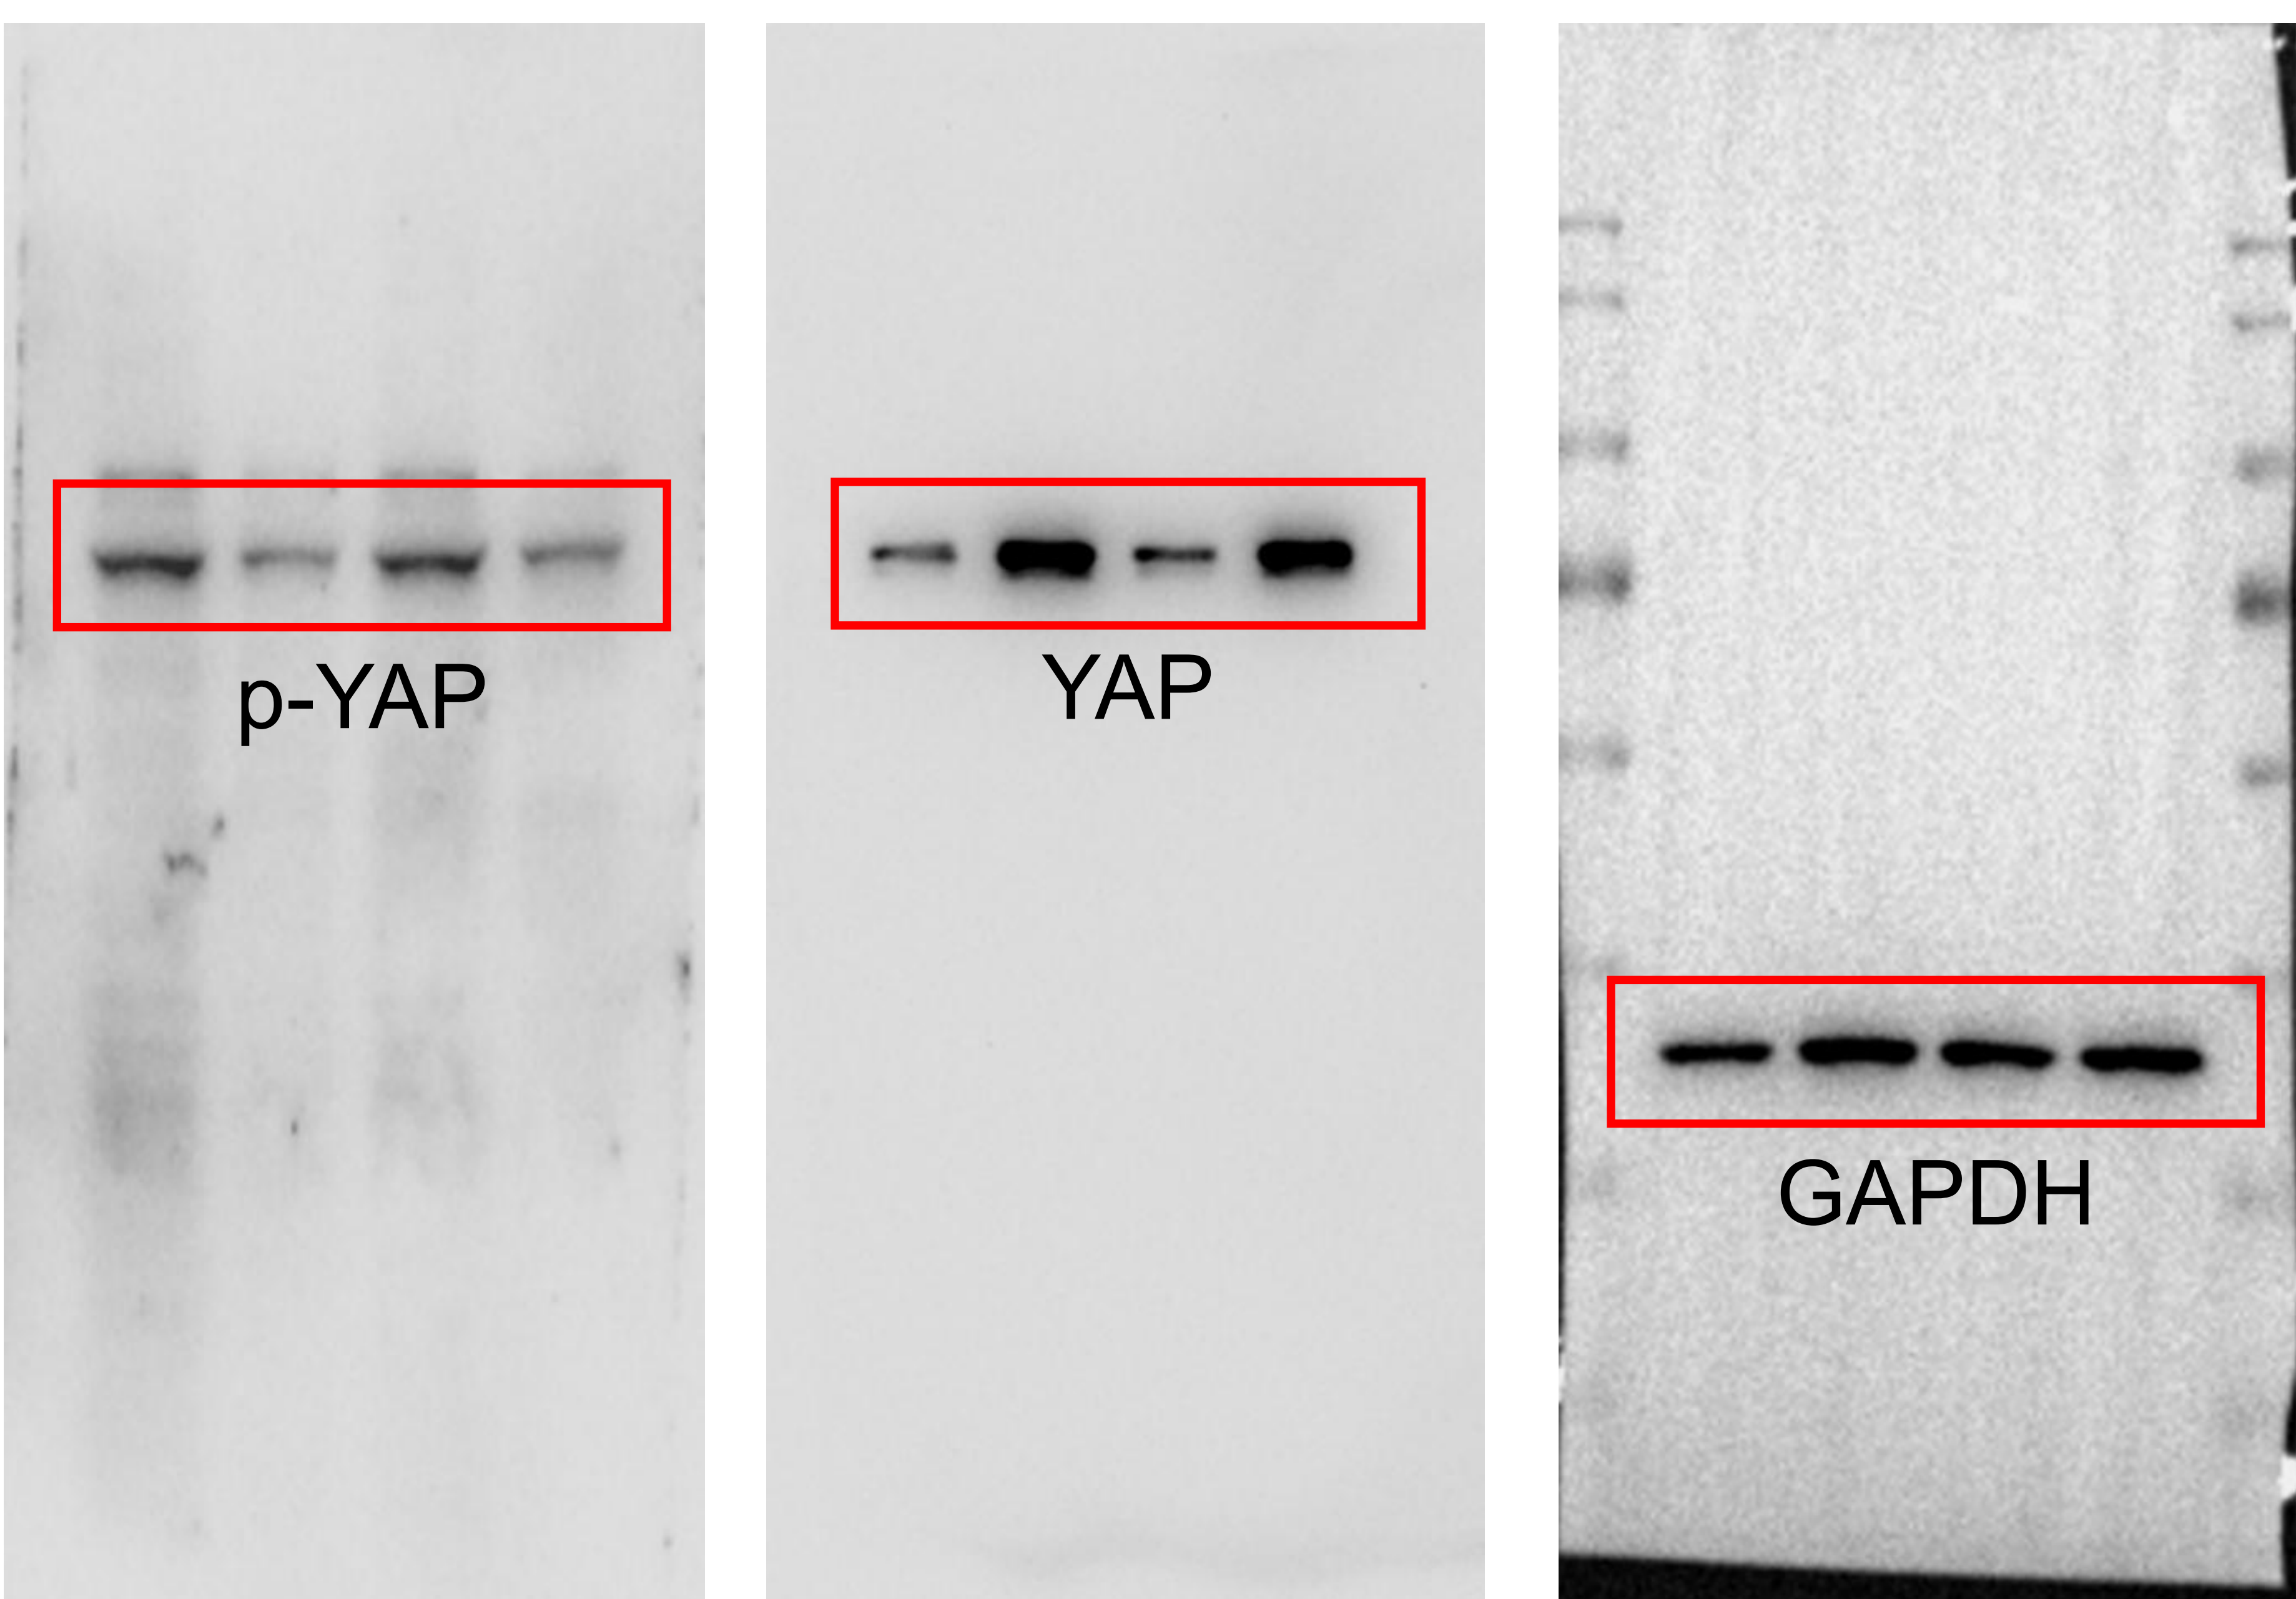

S1PR5 siRNA

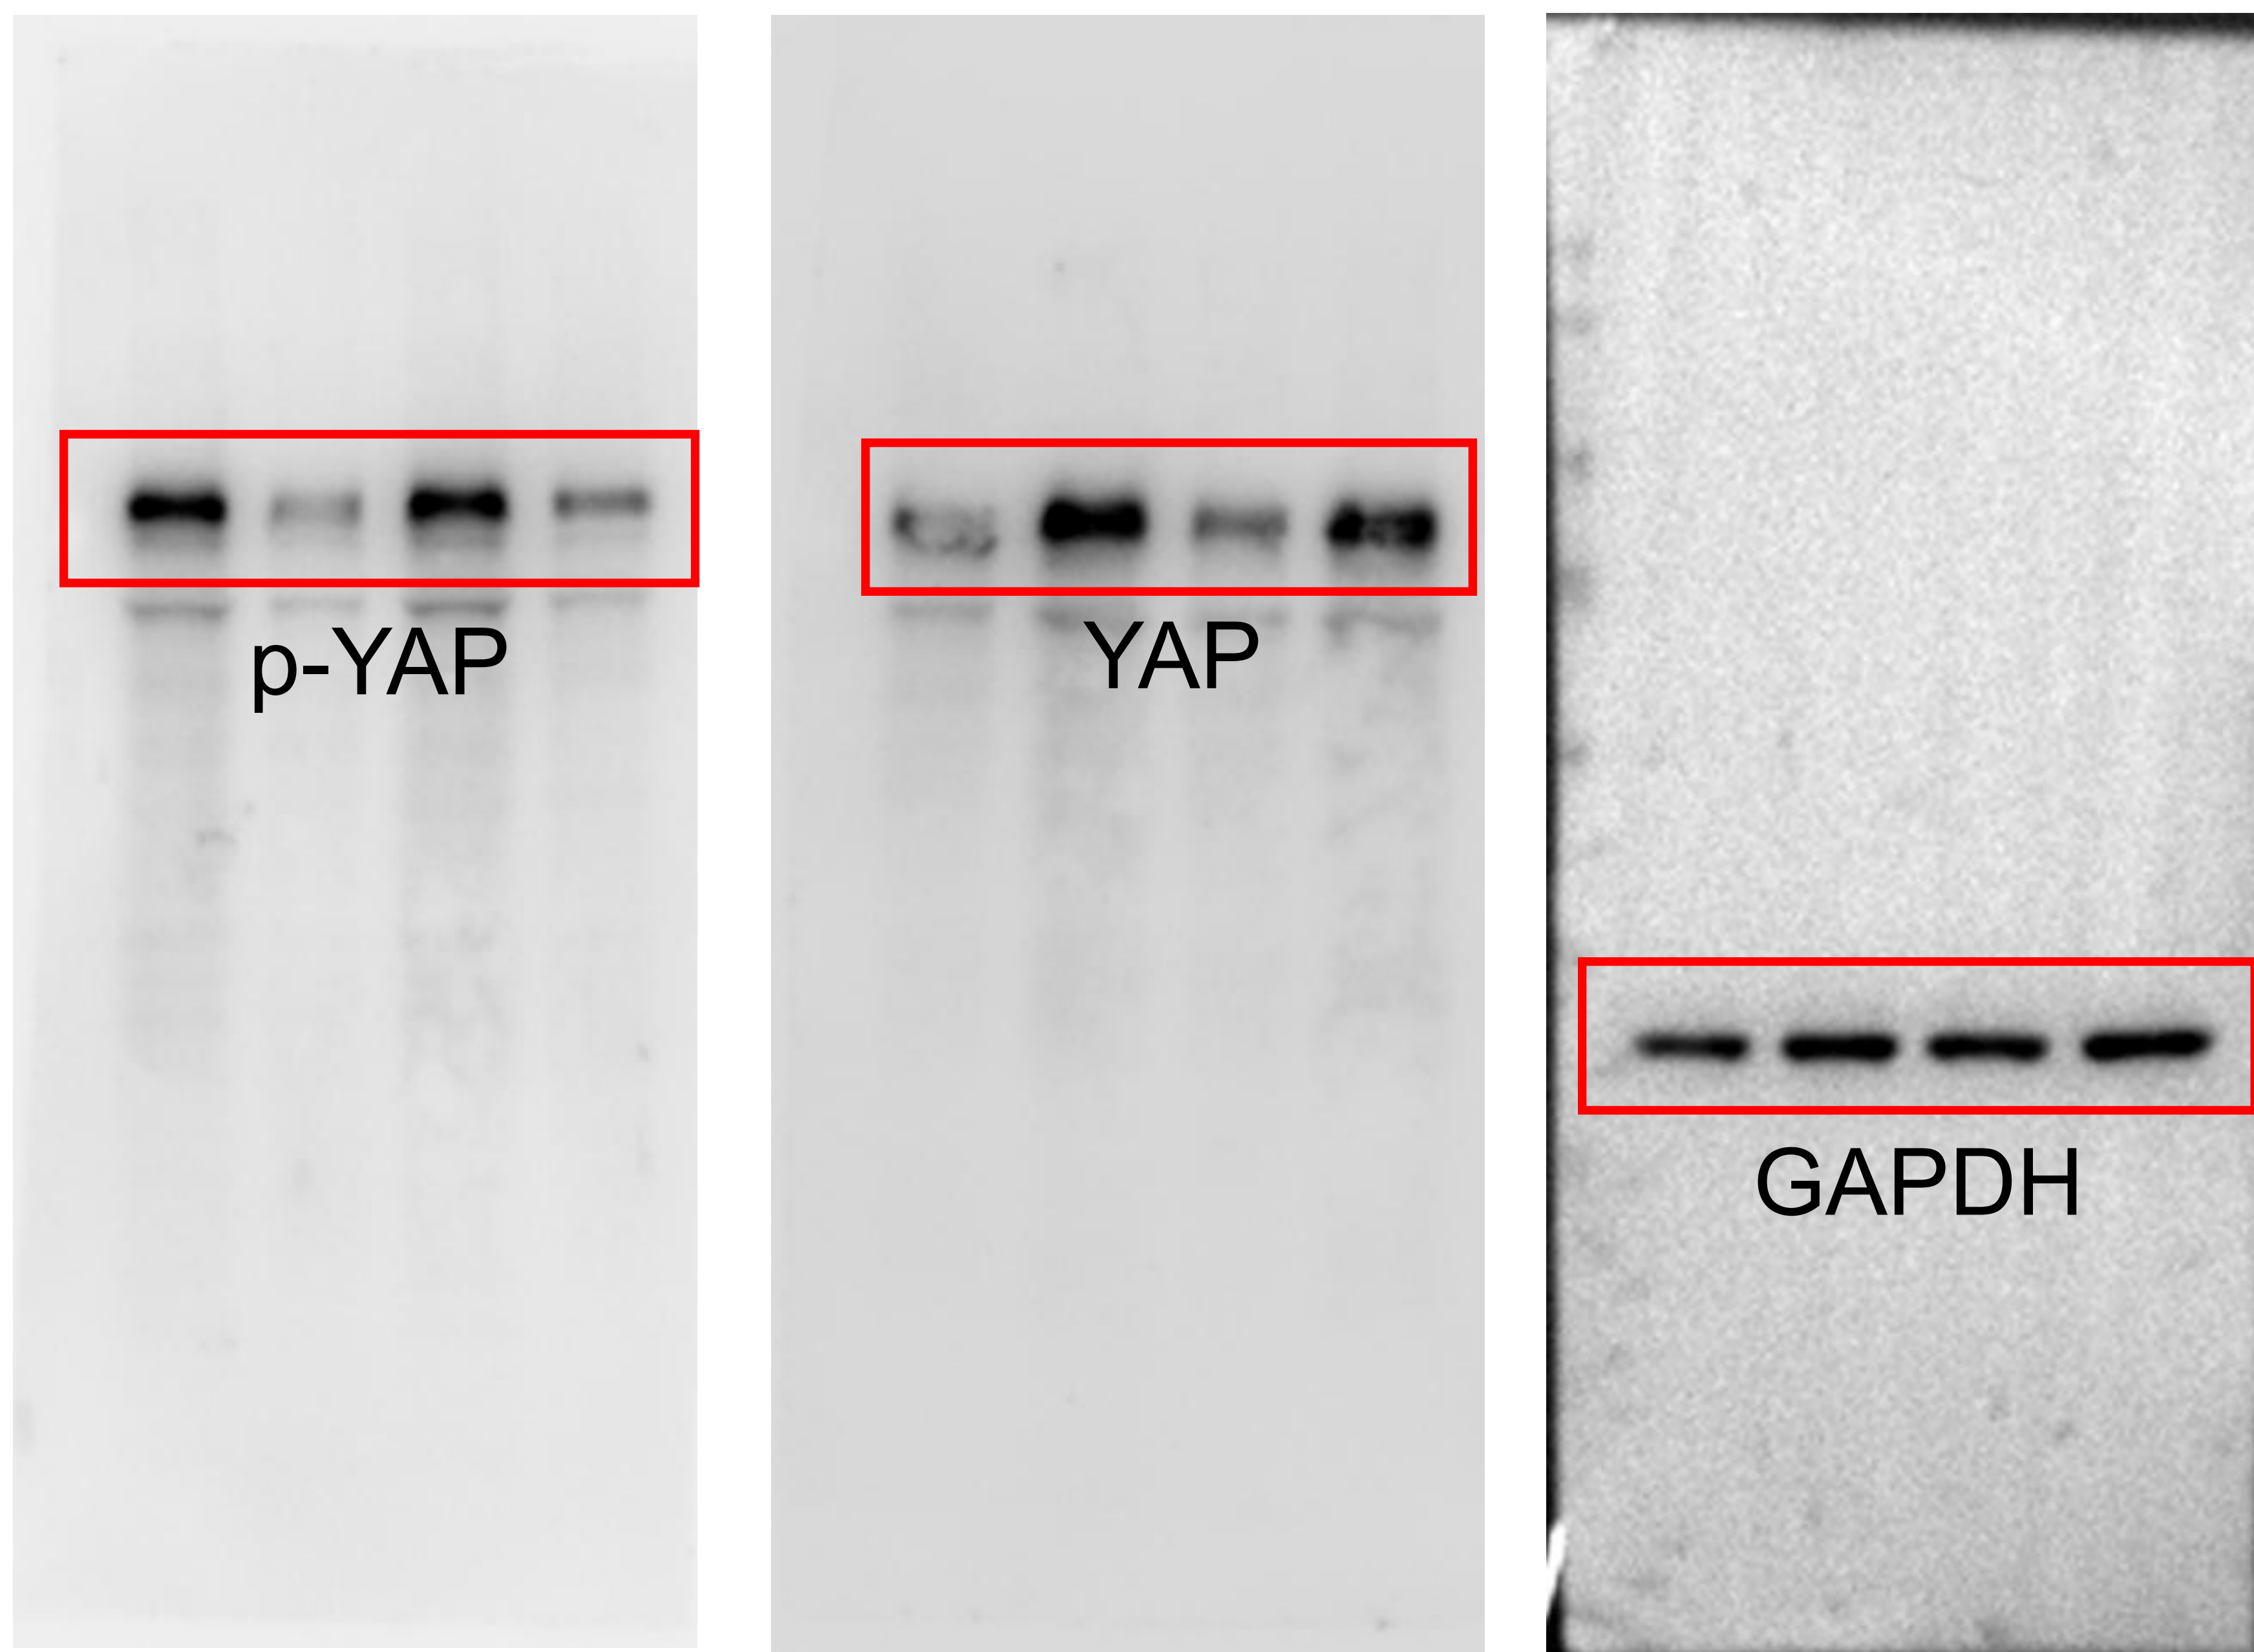



Figure S14C

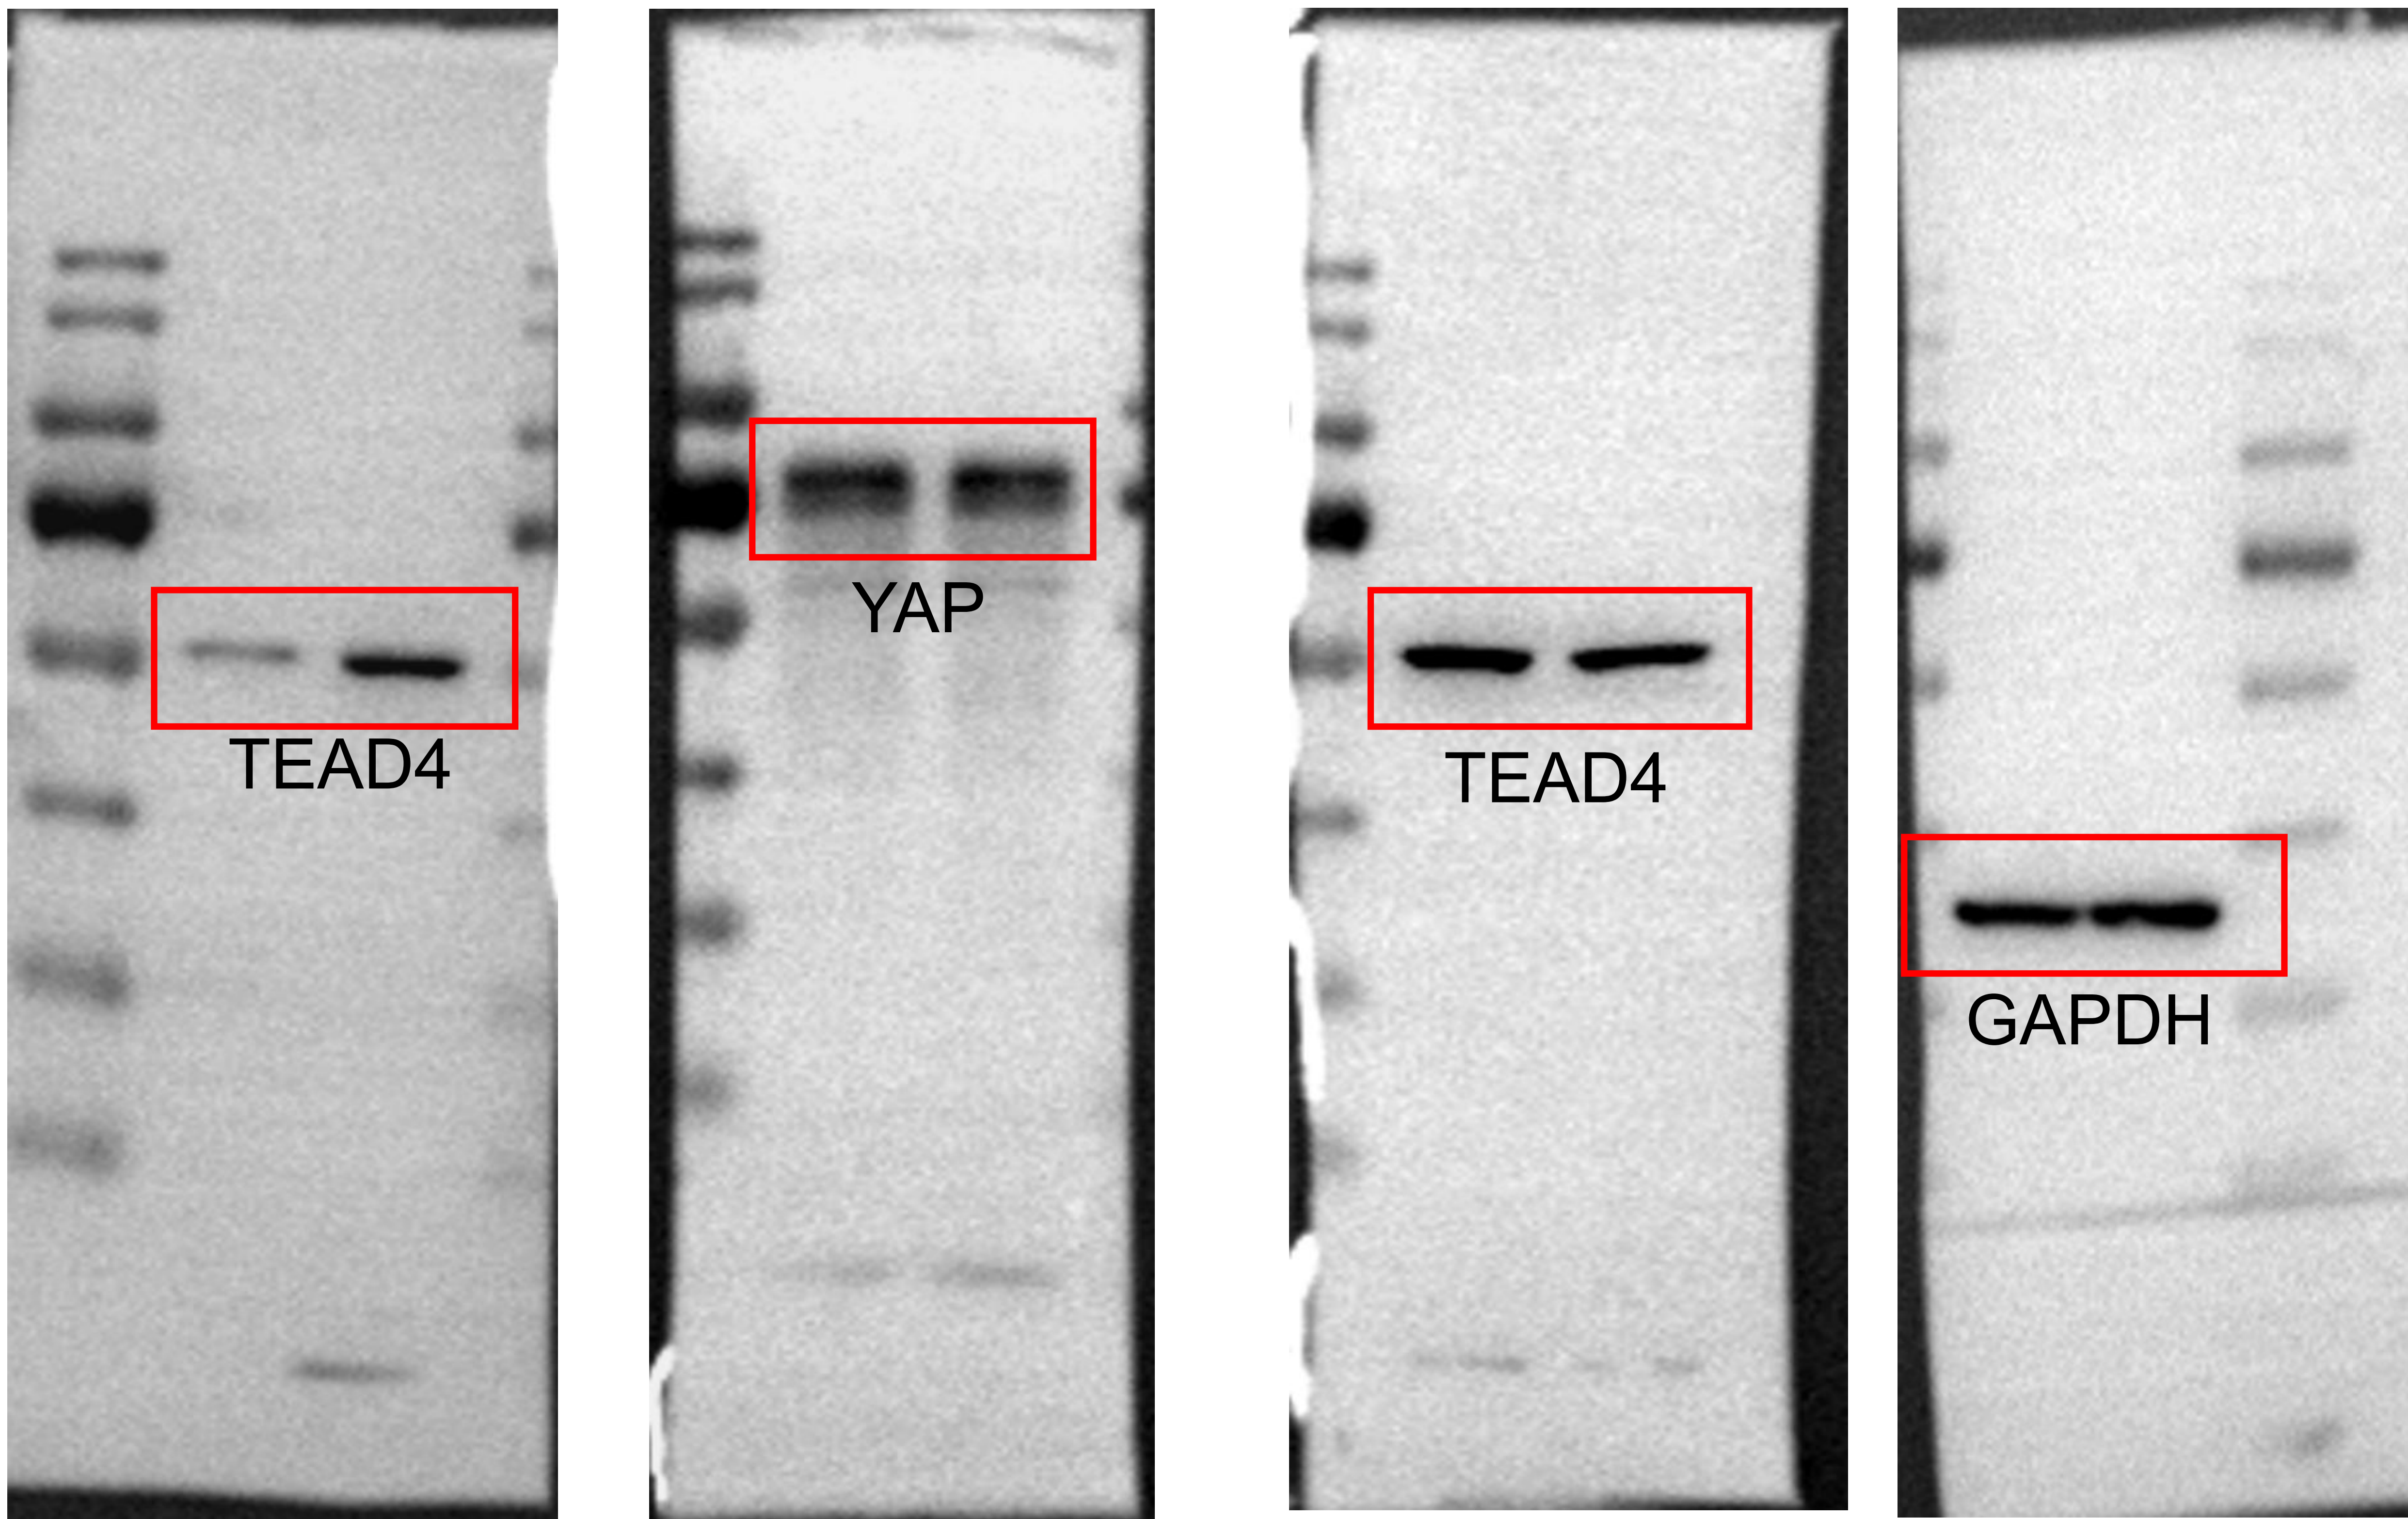

Figure S14D

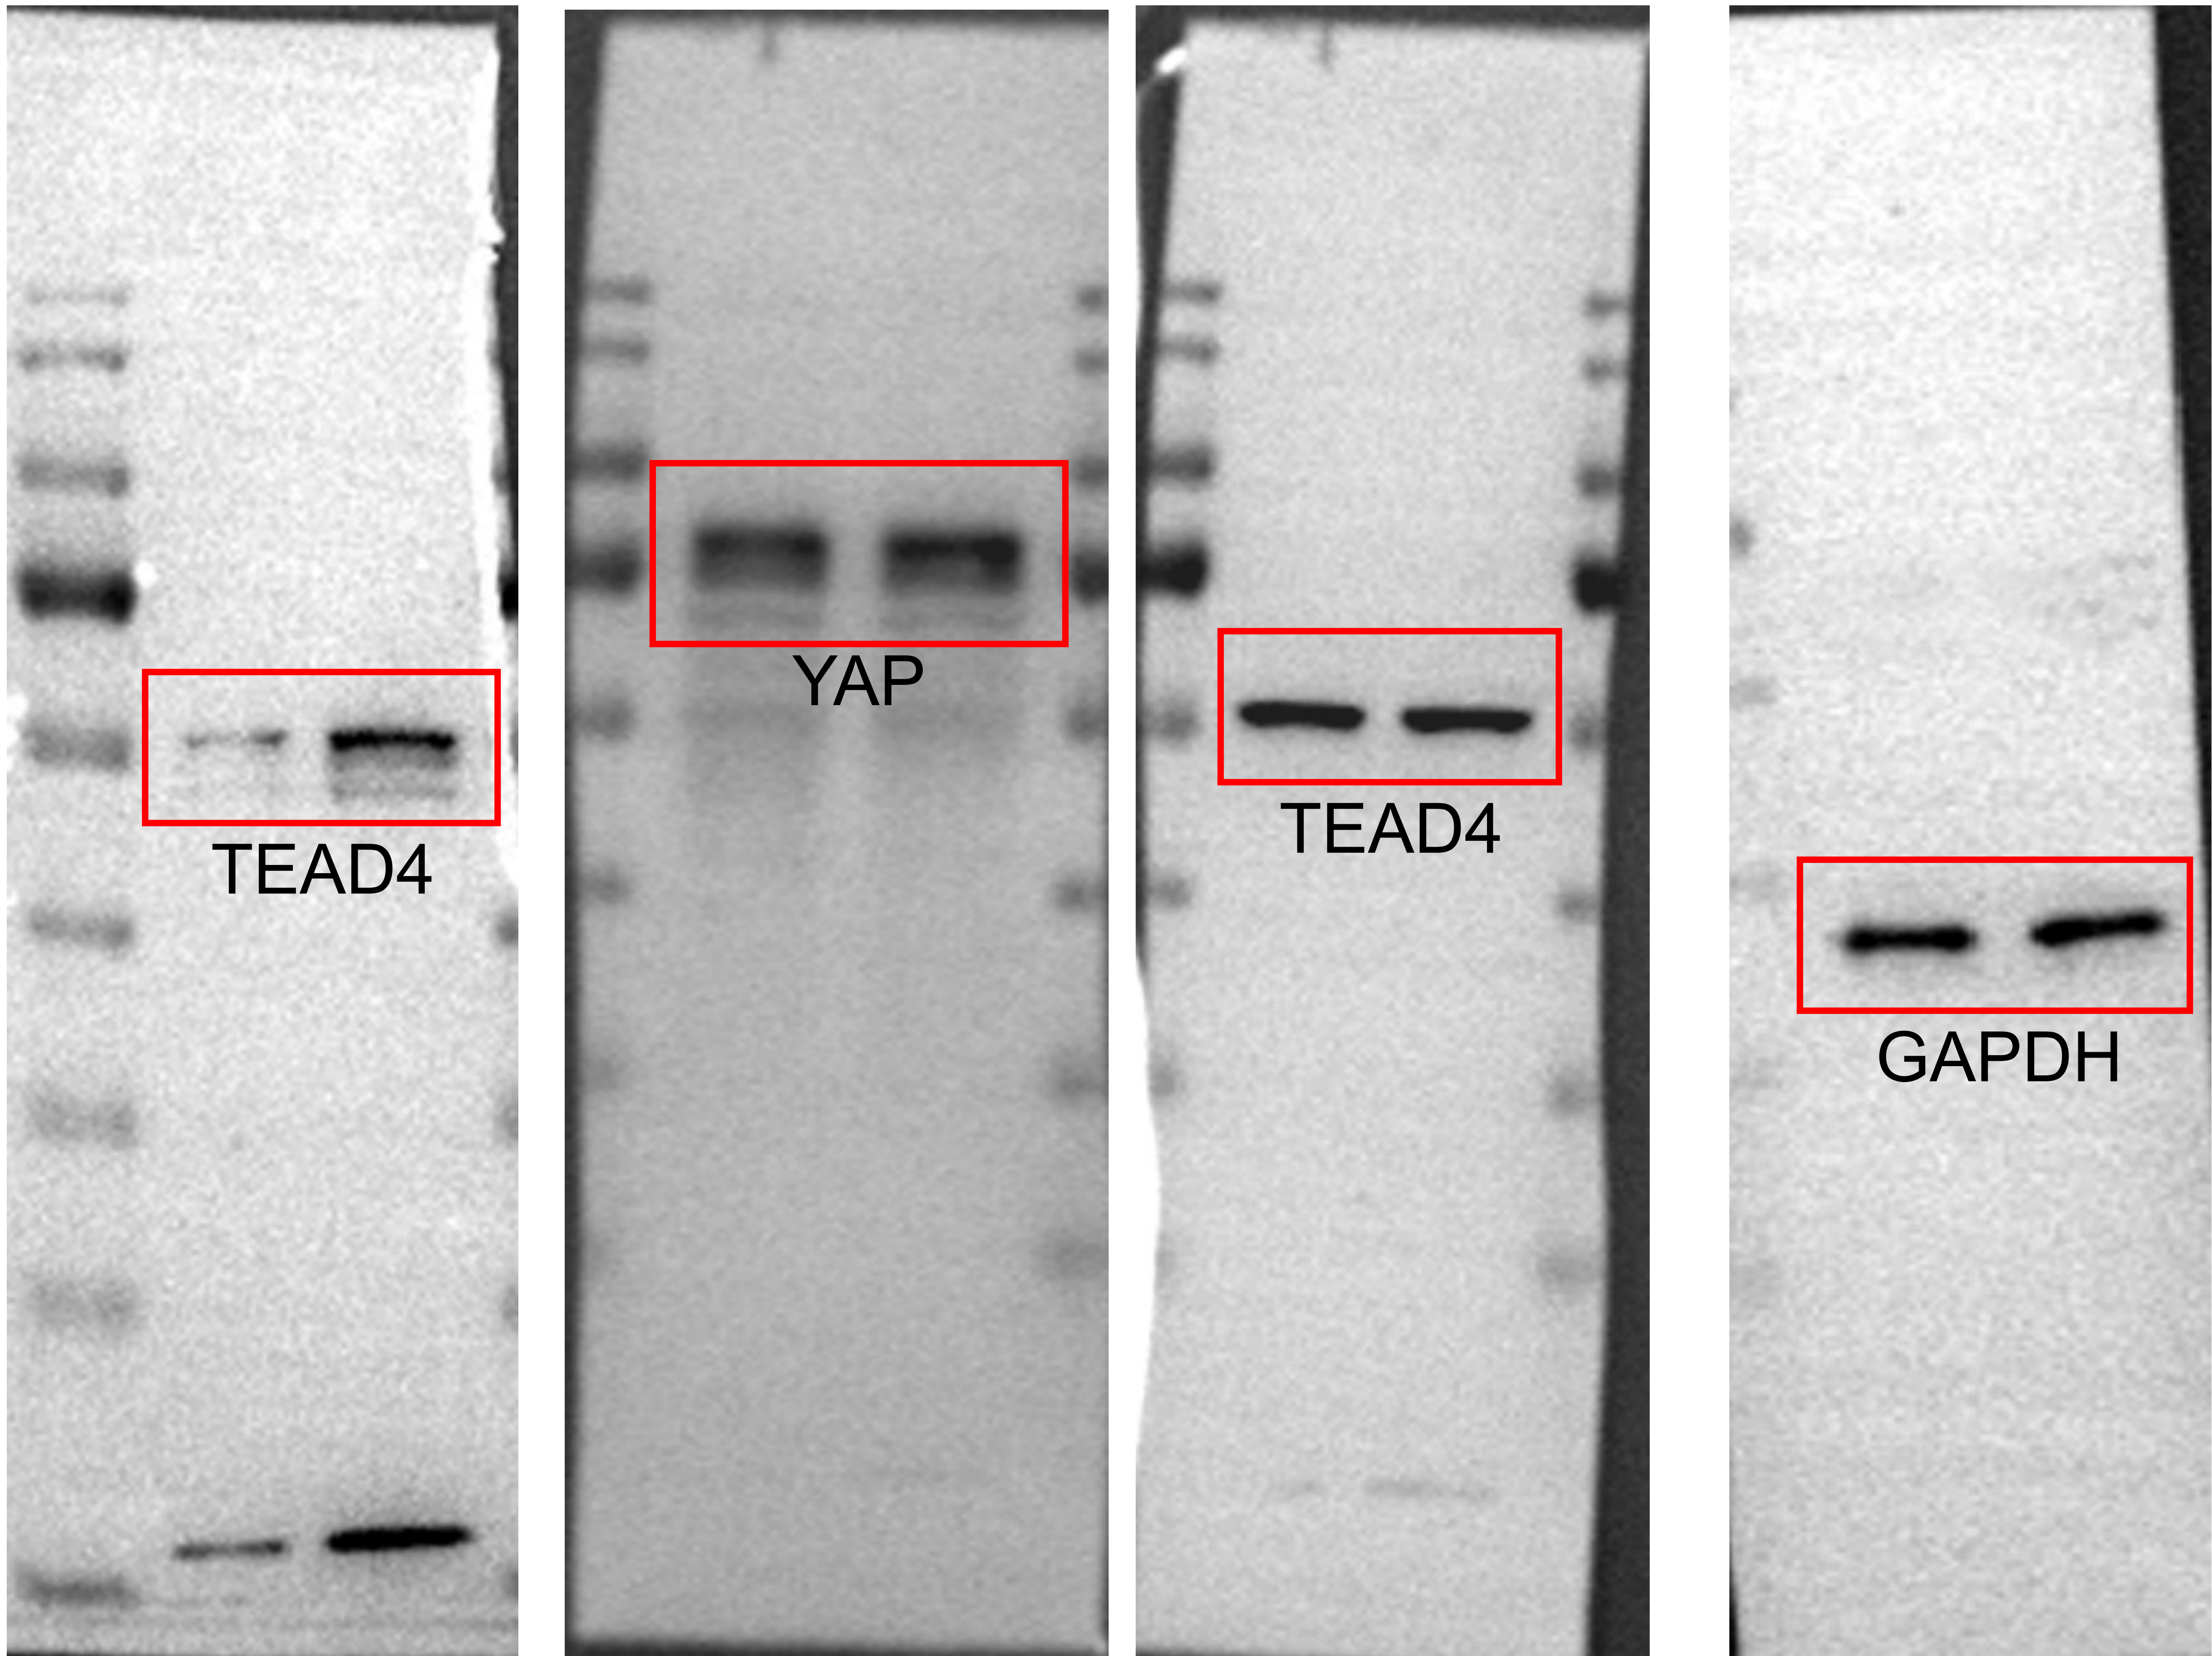

Figure 6C

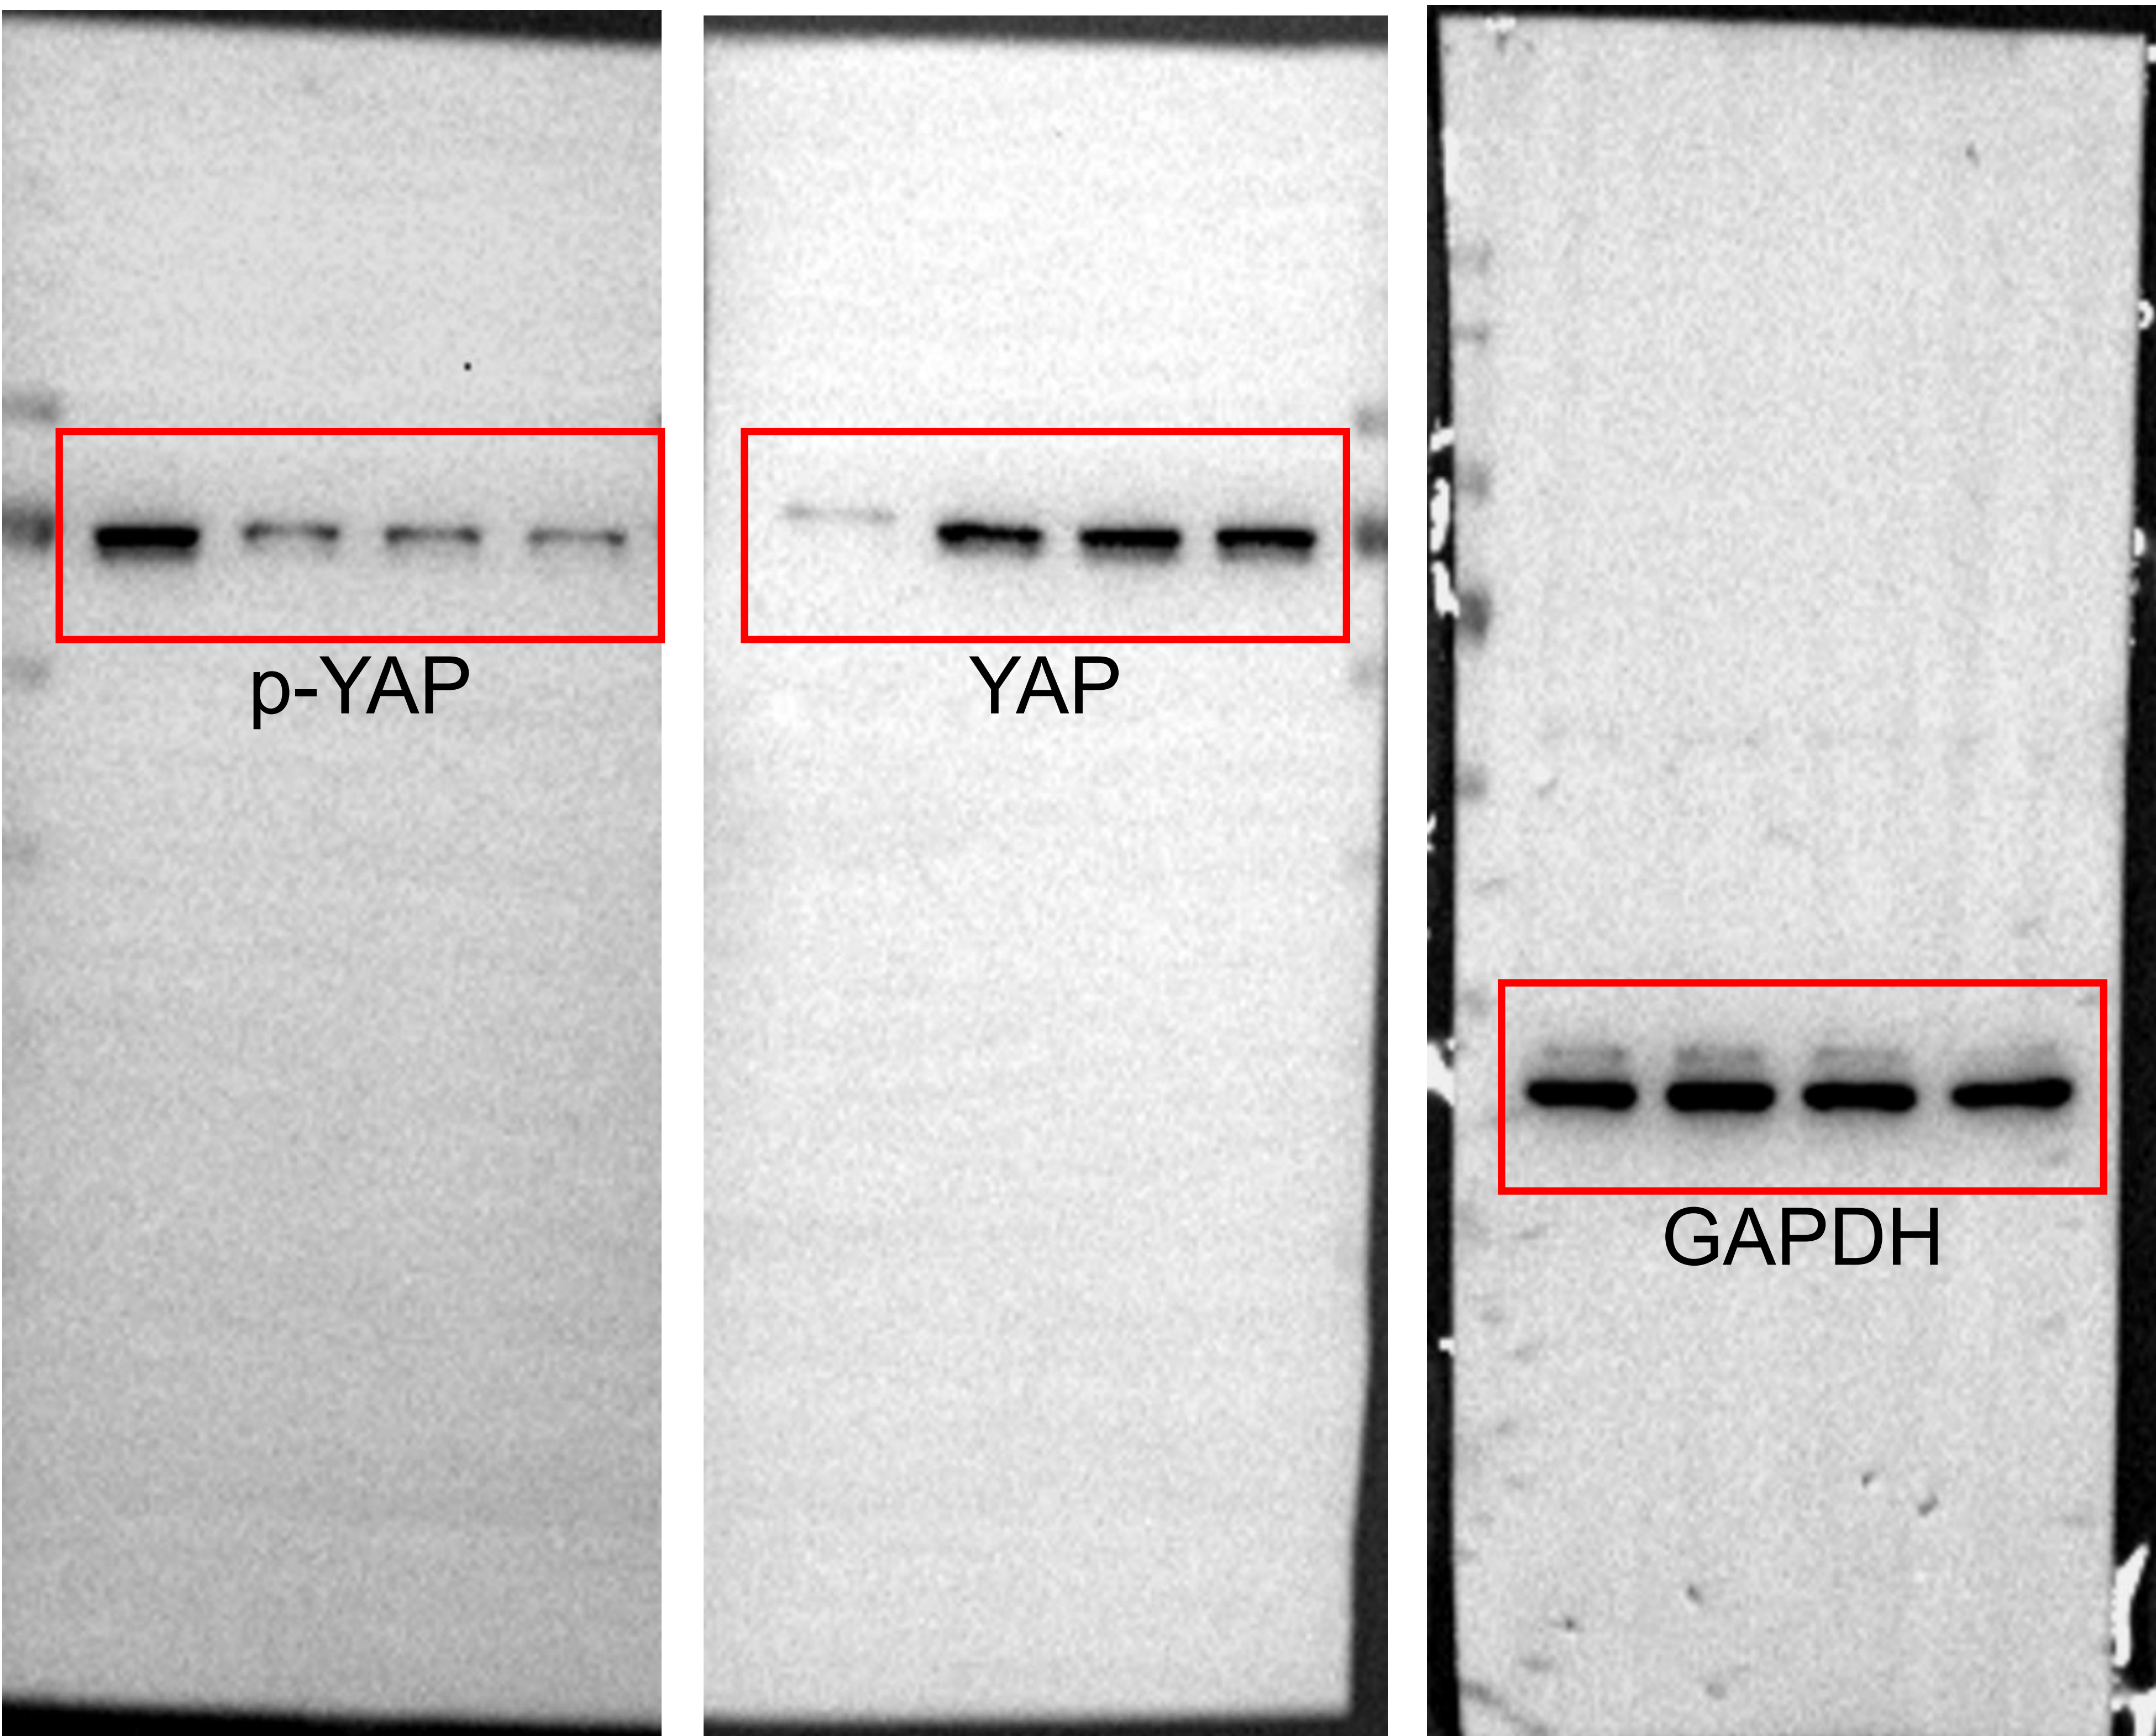

Figure 6D

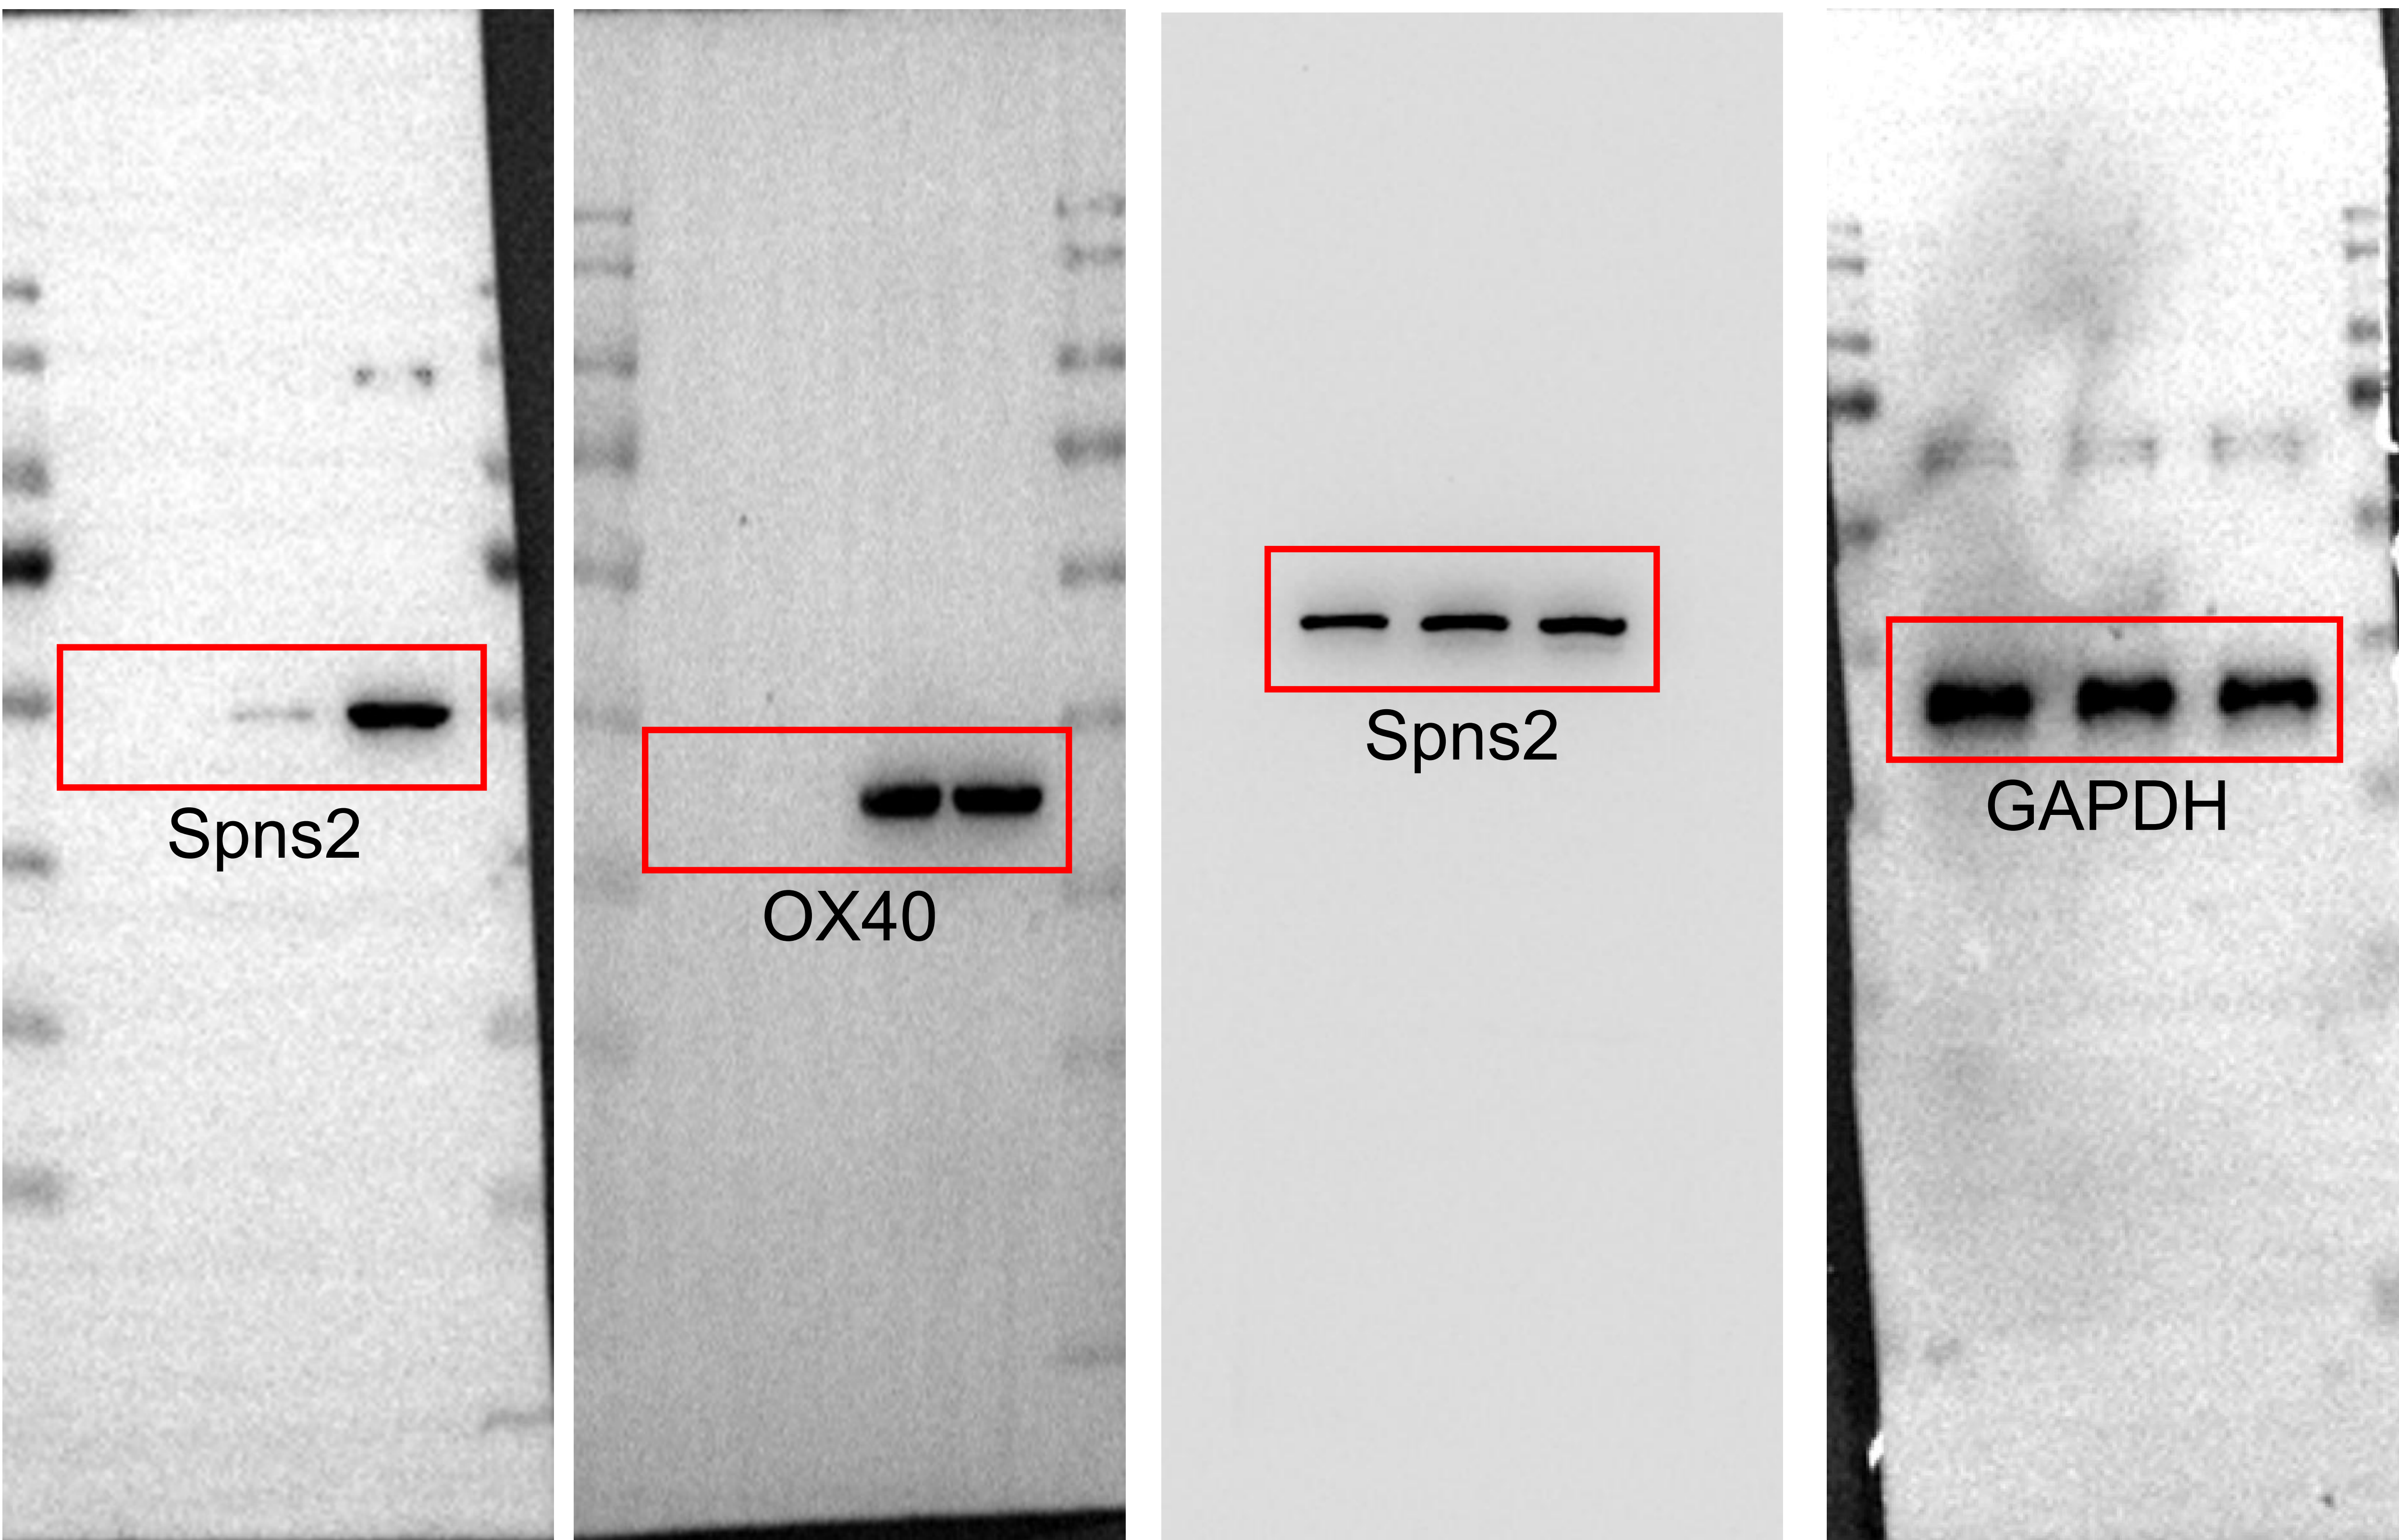



**Figure S15**

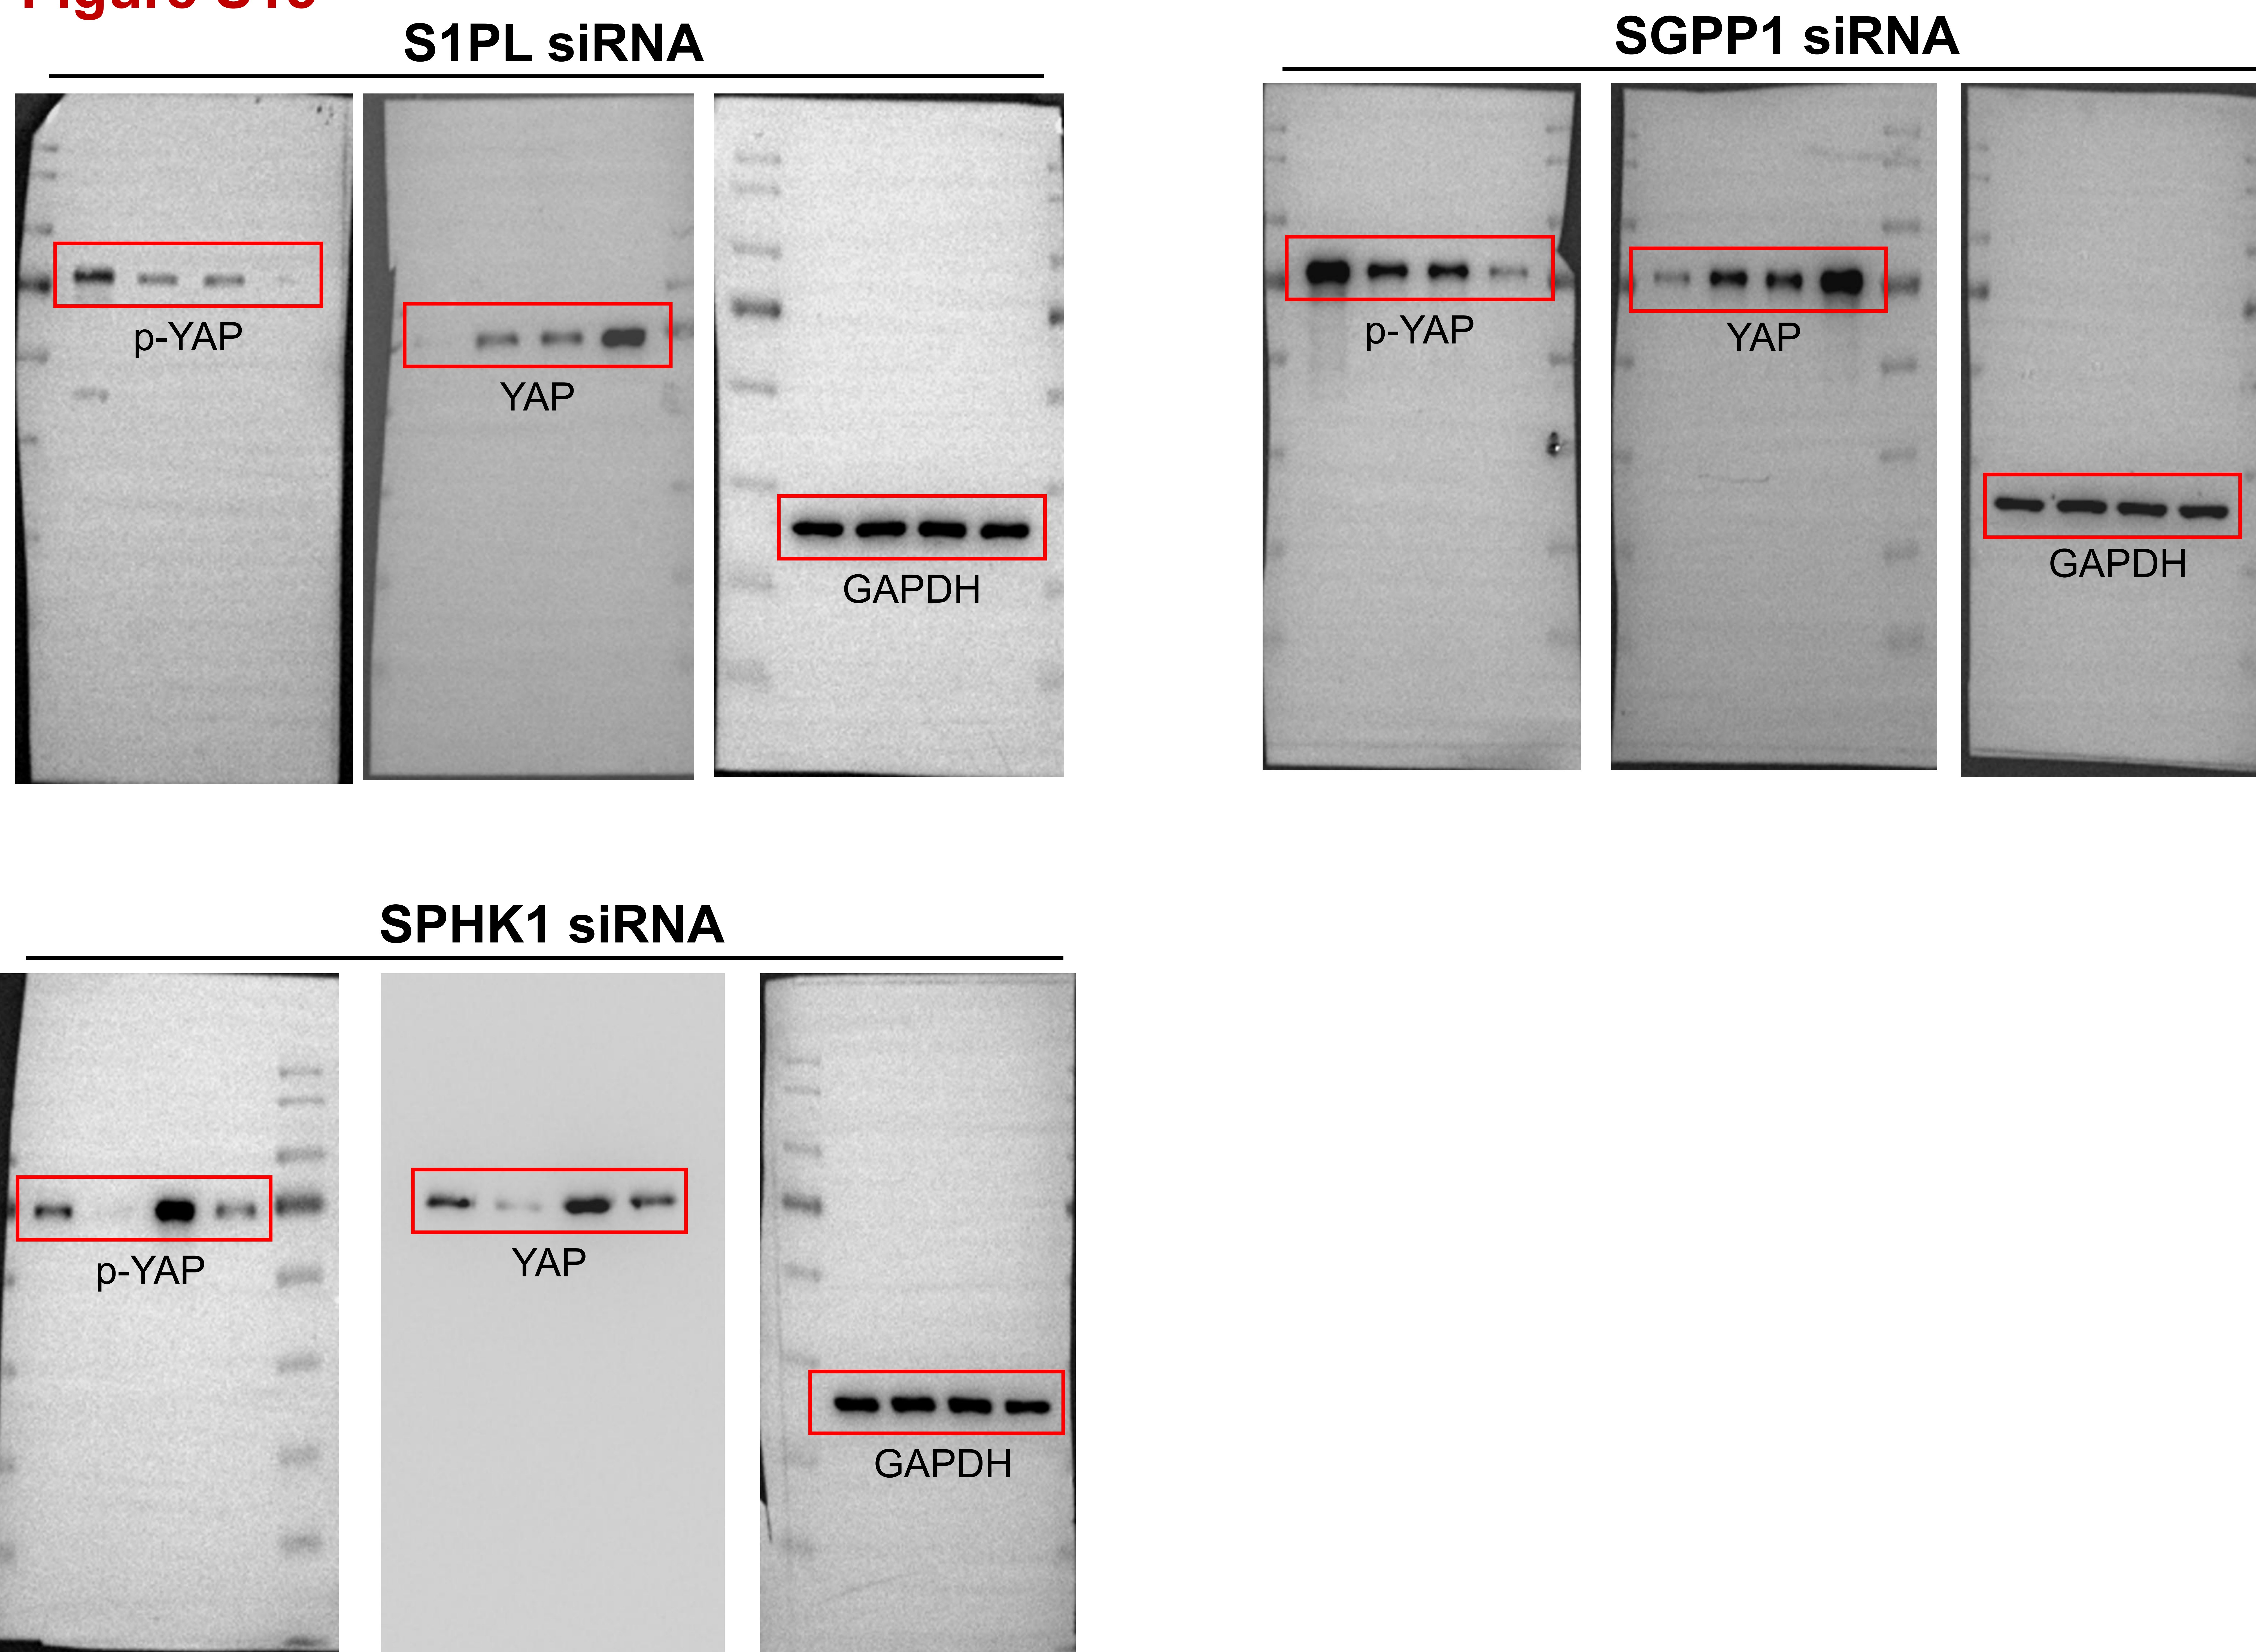

**Figure S17A**

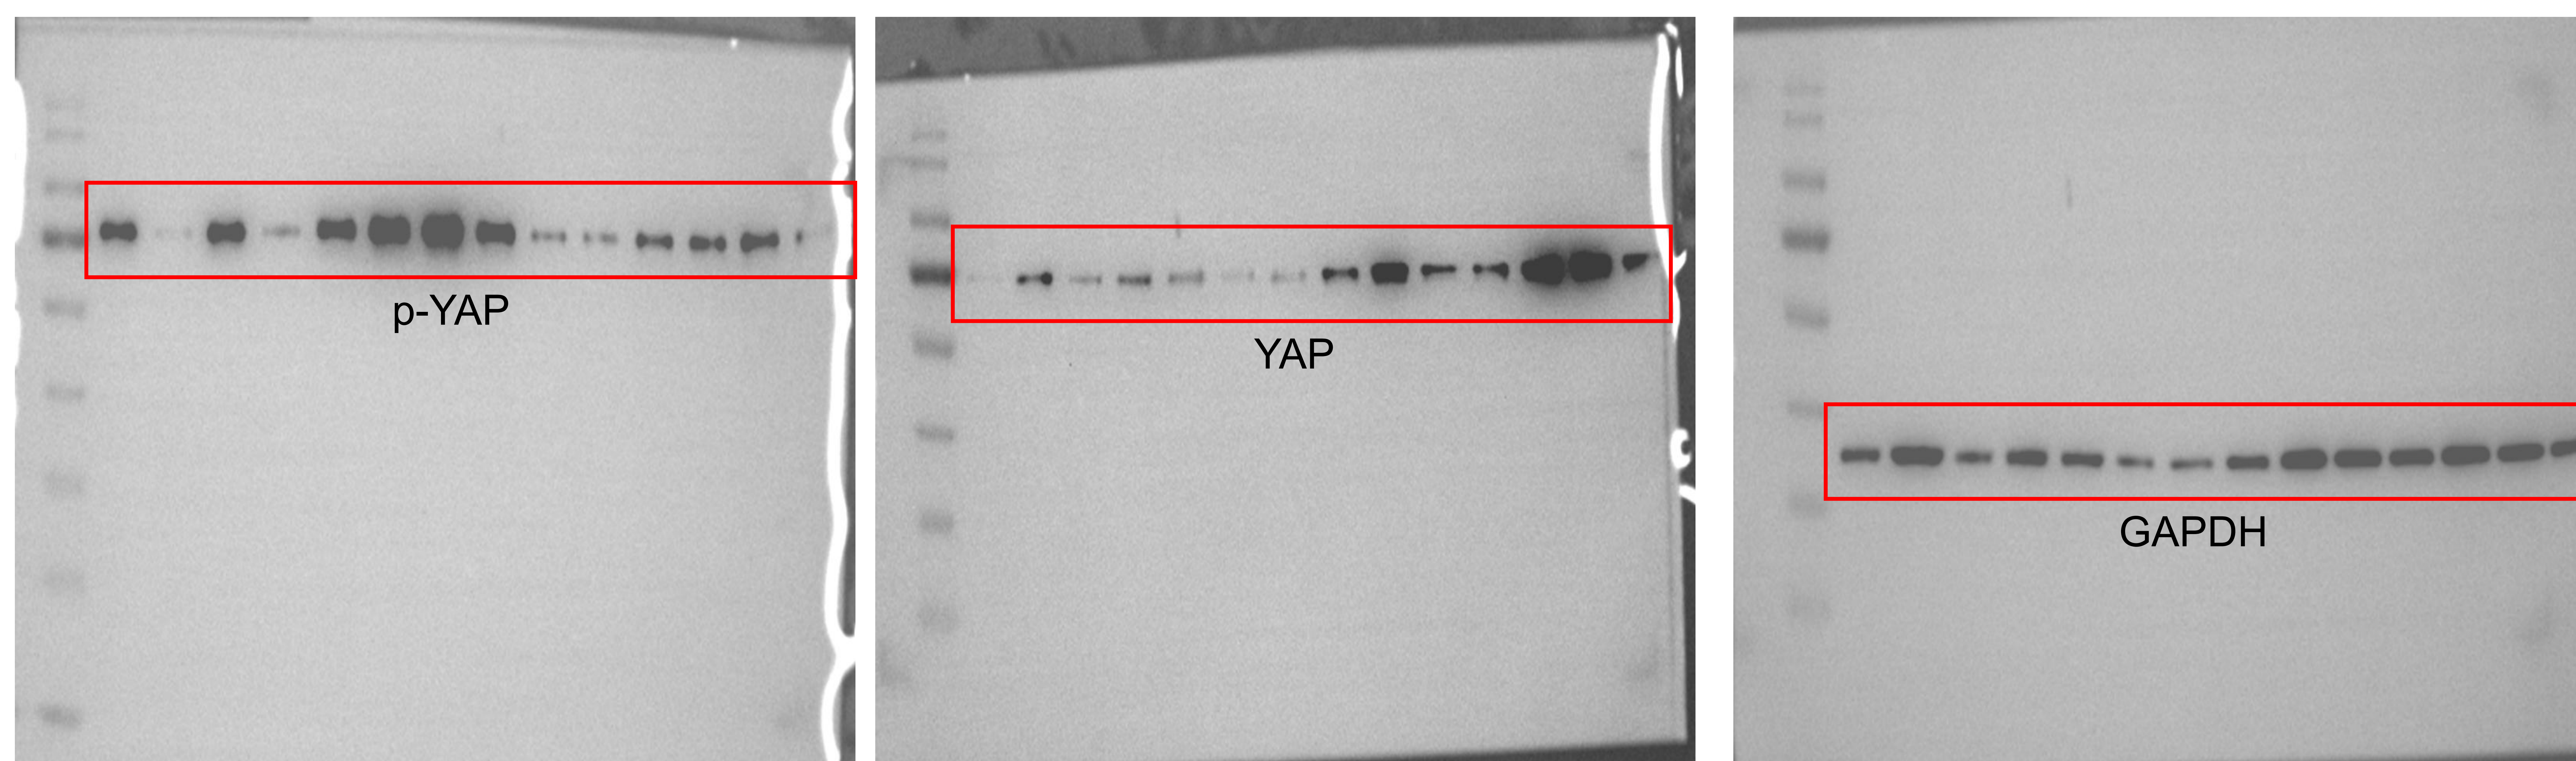

Supplement: Supplementary file 1 [file 4302ea27c4439124f1f1c9ad.pdf]
