# Supplementary material for: OX40 expressed in endothelial cells facilitates tumor cells to escape from T-cell surveillance through S1P-YAP axis
Source: Research Square preprint supplement (doi:10.21203/rs.3.rs-4337435/v1), 2024-05-14
Supplement: Supplementary file 1 [file Supplemental Table S5. Primers and oligos used in this study.doc]

**Supplemental Table S5. Primers and oligos used in this study**

| **Primer name** | **Primer sequences（5’ to 3’）** | |
| --- | --- | --- |
| **Primers for qRT-PCR** | | |
| OX40/TNFRSF4 | Forward | GCAATAGCTCGGACGCAATCT |
| Reverse | GAGGGTCCCTGTGAGGTTCT |
| CTGF | Forward | CAGCATGGACGTTCGTCTG |
| Reverse | AACCACGGTTTGGTCCTTGG |
| CYR61 | Forward | CTCGCCTTAGTCGTCACCC |
| Reverse | CGCCGAAGTTGCATTCCAG |
| ANKRD1 | Forward | AGTAGAGGAACTGGTCACTGG |
| Reverse | TGTTTCTCGCTTTTCCACTGTT |
| YAP | Forward | TAGCCCTGCGTAGCCAGTTA |
| Reverse | TCATGCTTAGTCCACTGTCTGT |
| GAPDH | Forward | GGAGCGAGATCCCTCCAAAAT |
| Reverse | GGCTGTTGTCATACTTCTCATGG |
| **Primers for ChIP-PCR** | | |
| OX40-promoter  P1: -663 to -674 | Forward | CCCAGATGGGGCAGAGA |
| Reverse | CGCCCTCTCGGCCCCA |
| OX40-promoter  P2: -663 to -674 | Forward | GCCACTTAGGCCCCAG |
| Reverse | AGCATCCCAGACAGTGTGTG |
| OX40-promoter  P3: -663 to -674 | Forward | AGGGCGGGTGGCCTCT |
| Reverse | ACCAGCCTGTGATTATCCAA |
| **Targeting sequences of siRNAs** | | |
| S1PR1 siRNA | Forward | UGGAAUUUCUUGGUUUUCCAAdTdT |
| Reverse | GGAAAACCAAGAAAUUCCACCdTdT |
| S1PR1 siRNA | Forward | GCUAUUCAUUAGAUAGUAAUUdTdT |
| Reverse | UUACUAUCUAAUGAAUAGCUGGdTdT |
| S1PR2 siRNA | Forward | UGAAAUUUAUUGUUUUUCCAGdTdT |
| Reverse | GGAAAAACAAUAAAUUUCACAdTdG |
| S1PR2 siRNA | Forward | GGCACUGACUAGUCACAUAGCdTdT |
| Reverse | UAUGUGACUAGUCAGUGCCUUdTdG |
| S1PR3 siRNA | Forward | GAGUCUUUCAGAUGUACUAAGdTdT |
| Reverse | UAGUACAUCUGAAAGACUCUGdTdT |
| S1PR3 siRNA-2 | Forward | CGAUAAUGAUAGUAUUAAUCCdTdT |
| Reverse | AUUAAUACUAUCAUUAUCGUUdTdT |
| S1PR4 siRNA-1 | Forward | GGCUCAUUGUUCUGCACUACAdTdT |
| Reverse | UAGUGCAGAACAAUGAGCCGGdTdT |
| S1PR4 siRNA-2 | Forward | GCCUGGUGGUGCUGGAGAACUdTdT |
| Reverse | UUCUCCAGCACCACCAGGCAGdCdA |
| S1PR5 siRNA-1 | Forward | GGACCUUGUGGGUGAUAUAGAdTdT |
| Reverse | UAUAUCACCCACAAGGUCCUUdTdT |
| S1PR5 siRNA-2 | Forward | GAAGACUCCUGCUAAGCAACCdTdT |
| Reverse | UUGCUUAGCAGGAGUCUUCAGdTdT |
| Spns2 siRNA-1 | Forward | GAGGCUGUGUCCUCAGUUACCdTdT |
| Reverse | UAACUGAGGACACAGCCUCUUdTdT |
| Spns2 siRNA-2 | Forward | GCACUUCUGCUGCAAUCAAGGdTdT |
| Reverse | UUGAUUGCAGCAGAAGUGCAGdTdT |
| S1PL siRNA-1 | Forward | GCAGGACAGGACUAUUCUAGCdTdT |
| Reverse | UAGAAUAGUCCUGUCCUGCAGdTdT |
| S1PL siRNA-2 | Forward | GAUUCAAAUAUGUCACCAAAGdTdT |
| Reverse | UUGGUGACAUAUUUGAAUCUGdTdT |
| SGPP1 siRNA-1 | Forward | GAAUGCAUAUGCUACUAUACAdTdT |
| Reverse | UAUAGUAGCAUAUGCAUUCUGdTdT |
| SGPP1 siRNA-2 | Forward | GCAUGUGGAUCUCAUGUUACUdTdT |
| Reverse | UAACAUGAGAUCCACAUGCAAdTdT |
| SPHK1 siRNA-1 | Forward | CGACGAGGACUUUGUGCUAGUdTdT |
| Reverse | UAGCACAAAGUCCUCGUCGGGdTdT |
| SPHK1 siRNA-2 | Forward | CGAACCAAAUCCAAAUAAAGUdTdT |
| Reverse | UUUAUUUGGAUUUGGUUCGUGdTdT |
| SPHK2 siRNA-1 | Forward | GGUUGCUUCUAUUGGUCAAUCdTdT |
| Reverse | UUGACCAAUAGAAGCAACCGGdTdT |
| SPHK2 siRNA-2 | Forward | GGCGCUAGGAUUUGCACUAAUdTdT |
| Reverse | UAGUGCAAAUCCUAGCGCCGGdTdT |
| EGF siRNA-1 | Forward | GUUACAAGAUUGUAAGUAAAUdTdT |
| Reverse | UUACUUACAAUCUUGUAACUGdTdT |
| EGF siRNA-2 | Forward | CGACUAAUCACCUACUCAAUGdTdT |
| Reverse | UUGAGUAGGUGAUUAGUCGUAdTdT |
| Control siRNA | Forward | CCUACGCCACCAAUUUCGUdTdT |
| Reverse | ACGAAAUUGGUGGCGUAGGdTdT |
| **Reverse-ChIP probe sequences** | | |
| OX40/TNFRSF4  Promoter (304-328) | TTAAGGTCACAGGTCCAAGAAAGCC | |
| OX40/TNFRSF4  Promoter (527-551 ) | AATTGGTTCCTTGGAGGTTCAGGTG | |
| OX40/TNFRSF4  Promoter (739-763 ) | GACTGAGGGTCCCTAAGTTGGTCAC | |
| OX40/TNFRSF4  Promoter (960-986 ) | ATAACTGTGACCAGCCTGTGATTATCC | |
| OX40/TNFRSF4  Promoter (1214-1238 ) | GCTGAACTGTGCCCCTTAAATTCCT | |
| OX40/TNFRSF4  Promoter (1616-16640 ) | CAAGACTAGCTCTGAGCAGCAGTGA | |
| OX40/TNFRSF4  Promoter (1821-1846 ) | TTATTCTGCCTTCTGACCTCTTCTGC | |
| **Mice genotyping primers and probs** | | |
| ***OX40fl/fl;Cd31cre/-* mice** | | |
| 5'-arm | T012796-F1 | AAGCCATCTCTCCTCCCTATGCA |
| T012796-R1 | AGAGAGAGAGAGGGAAATGCCCACT |
| 3'-arm | T012796-F2 | GGGGAATAGTAACCAAAGAAGTGCC |
| T012796-R2 | CATATAGGAACTTCTGGTGGTTGGC |
| ***OX40ki/ki;Cd31cre/-* mice** | | |
| Loxp-1 | Forward | CCCACCTTGGTGACTCCTGAG |
| Reverse | CTTTATTAGCCAGAAGTCAGATGC |
| Loxp-2 | Forward | AGATCTGCAAGCTAATTCCTGC |
| Reverse | TTTAACACAGTTGAGCCGCCTT |
| WT | Forward | CACTTGCTCTCCCAAAGTCGCTC |
| Reverse | ATACTCCGAGGCGGATCACAA |
| Cre | Forward | GGCAACGTGCTGGTTATTGTG |
| Reverse | TTTAACACAGTTGAGCCGCCTT |
