# Supplementary material for: OX40 expressed in endothelial cells facilitates tumor cells to escape from T-cell surveillance through S1P-YAP axis
Source: Research Square preprint supplement (doi:10.21203/rs.3.rs-4337435/v1), 2024-05-14
Supplement: Supplementary file 16 [file Supplementary Table S6. Clinial information of 172 cases CRC patients for PDX models and tissue microarray.xls]

## Sheet: CRC PDX models
Supplementary Table S6. Clinial information of 172 cases CRC patients for PDX models and tissue microarray
Patients	Gender	Age	Tumor diameter (cm)	Pathological stage	TNM	EGF (μg/L)
#1	Male	66	3.4	High	T3N0M0	0.1174
#2	Female	64	3.2	Moderate	T3N1M0	0.1229
#3	Female	58	4.2	Moderate	T2N0M0	0.2714
#4	Female	49	3.9	Low	T4N1M1	0.3564
#5	Male	77	2.7	Moderate	T4N1M0	0.6265
#6	Female	68	3	Low	T3N0M0	7.0624
#7	Male	58	2.9	Low	T3N0M0	7.1207
#8	Female	77	4.3	High	T4N1M1	7.2301
#9	Male	44	3.6	Moderate	T3N0M1	7.4278
#10	Male	66	2.8	Moderate	T3N0M0	7.7271

## Sheet: Tissue Microarray
Patients	Gender	Age	Tumor diameter (cm)	Differentiation degree	TNM	Alive or dead	Survival time (Month)
1	Male	62	5.4	Moderate	T2N0M0	Alive	80
2	Male	80	12.1	Moderate	T3N1M0	Death	13
3	Male	61	5.2	Moderate	T3N1M0	Death	16
4	Female	69	8	Moderate	T4N1M1	Death	43
5	Male	68	4.5	Moderate	T3N0M0	Alive	90
6	Female	74	6.6	Moderate	T3N1M0	Alive	90
7	Female	48	2.2	Moderate	T2N0M0	Alive	91
8	Male	82	6.8	Moderate	T3N0M0	Alive	102
9	Male	59	3	Moderate	T2N0M0	Alive	102
10	Male	31	2	Moderate	T3N0M1	Death	9
11	Female	44	3.2	Moderate	T3N1M0	Death	14
12	Male	52	1.2	High	T2N0M0	Alive	70
13	Male	53	5	Moderate	T3N1M0	Alive	70
14	Male	66	6	Moderate	T3N0M1	Death	54
15	Male	59	3.5	Moderate	T3N0M0	Alive	71
16	Male	58	7.8	Moderate	T3N1M0	Alive	72
17	Male	40	2.7	Moderate	T3N0M1	Death	68
18	Male	58	3.3	Moderate	T3N0M1	Death	40
19	Male	27	4.7	Moderate	T3N0M1	Death	2
20	Female	54	2.4	Moderate	T3N0M1	Death	63
21	Female	40	6	Moderate	T3N1M1	Death	47
22	Male	72	5	Moderate	T3N0M1	Death	18
23	Female	61	2.2	Moderate	T3N0M1	Death	18
24	Male	52	2.2	Moderate	T3N0M0	Alive	80
25	Male	49	2	Moderate	T3N0M1	Death	47
26	Female	61	3.5	Moderate	T3N1M0	Death	10
27	Female	68	5	Moderate	T3N0M1	Death	25
28	Female	67	7	Moderate	T4N1M1	Death	6
29	Male	75	2.5	Moderate	T3N1M0	Death	54
30	Female	72	3.8	Moderate	T3N0M1	Death	45
31	Male	52	5.2	Moderate	T4N0M1	Death	34
32	Male	66	3	Moderate	T3N0M1	Death	23
33	Female	43	4	Moderate	T3N1M1	Death	50
34	Female	54	7	Moderate	T4N1M0	Alive	88
35	Male	55	4	Moderate	T3N0M0	Alive	90
36	Female	70	3.5	Moderate	T3N0M0	Alive	91
37	Male	55	3.5	Moderate	T3N1M1	Death	8
38	Male	45	3	Moderate	T3N1M1	Death	3
39	Female	60	6	Moderate	T4N1M1	Death	2
40	Female	64	5	Moderate	T3N0M1	Death	52
41	Male	77	3.5	Moderate	T3N0M1	Death	28
42	Male	60	4	Moderate	T3N0M1	Death	5
43	Male	55	4	Moderate	T3N1M1	Death	20
44	Female	39	4	Moderate	T3N0M1	Death	8
45	Male	54	6	Moderate	T3N0M0	Alive	70
46	Male	60	1.5	Moderate	T3N1M1	Death	48
47	Male	42	6	Poor	T3N1M1	Death	52
48	Female	46	5	Moderate	T3N1M1	Death	32
49	Female	65	4	Moderate	T3N0M0	Alive	73
50	Male	78	3.2	Moderate	T3N0M0	Alive	75
51	Male	74	6	Moderate	T3N1M0	Alive	66
52	Male	77	5	Moderate	T3N0M1	Death	31
53	Female	44	3	Moderate	T3N1M1	Death	10
54	Male	69	4	Moderate	T3N1M1	Death	7
55	Male	80	3.5	Moderate	T3N0M1	Death	25
56	Female	32	6	Moderate	T2N1M1	Death	16
57	Female	57	2.3	Moderate	T1N0M0	Alive	84
58	Female	57	2.5	High	T3N1M0	Alive	85
59	Male	70	5	Moderate	T3N1M1	Death	7
60	Male	43	9	Poor	T2N1M0	Alive	95
61	Male	70	4	Moderate	T3N0M0	Alive	111
62	Male	41	6	High	T2N0M0	Alive	98
63	Male	67	1.5	High	T2N0M0	Alive	104
64	Female	58	2	Moderate	T3N0M0	Death	82
65	Female	81	5	High	T3N0M0	Alive	108
66	Female	41	3	Poor	T2N1M1	Death	87
67	Male	51	5	Moderate	T4N1M0	Alive	112
68	Male	69	5	Moderate	T4N1M1	Death	90
69	Male	49	3	Moderate	T2N0M0	Alive	115
70	Female	40	3.5	Moderate	T3N1M0	Alive	134
71	Female	35	5	Moderate	T4N0M0	Alive	134
72	Female	62	3	Moderate	T2N0M0	Alive	135
73	Male	51	3.5	Moderate	T2N0M1	Death	65
74	Female	30	2	Moderate	T2N0M0	Alive	138
75	Female	55	3.5	Poor	T3N1M0	Alive	139
76	Male	67	6	Moderate	T2N0M1	Death	83
77	Male	68	6	Moderate	T2N0M0	Alive	140
78	Male	68	4	Poor	T3N0M0	Death	70
79	Female	65	2.5	Poor	T2N0M0	Alive	143
80	Female	81	9.5	Poor	T3N0M0	Death	76
81	Female	79	3	Moderate	T3N0M0	Alive	146
82	Male	41	6.5	Poor	T4N0M0	Alive	145
83	Female	46	2.7	Moderate	T2N0M0	Alive	55
84	Male	56	8.1	poor	T3N2M0	Alive	55
85	Male	45	8.4	Moderate	T4aN1bM0	Death	32
86	Male	73	1.5	Moderate	T3N0M0	Death	35
87	Male	49	7.4	Moderate	T3N0M?	Alive	54
88	Male	43	7.4	Moderate	T4N2M1	Alive	54
89	Female	38	5.5	Moderate	T3N0M0	Alive	54
90	Male	66	6.6	Moderate	T2N0M0	Death	30
91	Male	66	6.2	poor	T4N0M0	Alive	54
92	Male	53	6.4	Moderate	T4N1M1a	Alive	54
93	Male	75	4.3	Moderate	T4N2M0	Death	32
94	Male	48	9.6	Moderate	T4N0M0	Alive	53
95	Male	50	3.1	poor	T4aN1bM1	Death	48
96	Male	49	2.8	Moderate	T4bN1M0	Alive	53
97	Female	63	8.6	Moderate	T4N0M0	Alive	53
98	Male	48	5.5	Moderate	T4N0M0	Alive	53
99	Female	63	7.4	Moderate	T4N0M0	Alive	54
100	Male	53	3.9	Moderate	T4N1M0	Death	40
101	Female	46	6.2	Moderate	T4N0M0	Alive	53
102	Male	54	2.8	Moderate	T4N0M0	Alive	53
103	Male	55	4.9	Moderate	T4N0M0	Alive	53
104	Female	80	4.3	Moderate	T4N1M1	Death	53
105	Male	55	7.4	high	T3N0M0	Alive	56
106	Male	54	4.9	Moderate	T4N2M0	Death	8
107	Female	67	6.2	Moderate	T3N1M0	Death	20
108	Female	73	2.8	Moderate	T3N0M0	Alive	52
109	Male	70	4.9	Moderate	T3N0M0	Death	16
110	Male	61	4.3	Moderate	T3N0M0	Alive	52
111	Female	43	4.9	Moderate	T2N0M0	Alive	52
112	Male	59	7.4	Moderate	T3N2M0	Death	23
113	Female	49	6.2	Moderate	T4N2M0	Death	29
114	Female	76	9.8	Moderate	T3N0M0	Alive	52
115	Male	61	4.7	Moderate	T4N+M0	Death	27
116	Male	49	8.6	Moderate	T3N0M0	Death	51
117	Male	73	6.2	Moderate	T4N0M0	Alive	52
118	Male	60	7.4	Moderate	T2N0M0	Alive	51
119	Female	58	6.2	Moderate	T4N0M0	Alive	51
120	Female	64	2.5	Moderate	T3N0M0	Alive	52
121	Male	64	4.3	Moderate	T4N1M0	Alive	51
122	Female	52	3.7	Moderate	T4N0M0	Alive	51
123	Female	66	4.9	Moderate	T4N1M0	Alive	51
124	Male	53	3.7	high	T4N2M0	Alive	51
125	Male	62	4.3	Moderate	T4N1M0	Alive	51
126	Male	52	5.5	Moderate	T4N2M0	Alive	51
127	Male	72	3	Moderate	T4N0M0	Death	51
128	Female	80	3.3	Moderate	T3N1M0	Death	9
129	Male	70	6.6	Moderate	T4N0M0	Alive	50
130	Male	32	7.4	Moderate	T4N0M0	Alive	51
131	Male	63	4.3	Moderate	T4N0M0	Alive	51
132	Male	51	3.7	poor	T3N2aM0	Alive	50
133	Male	72	4.3	Moderate	T3N1M0	Death	51
134	Male	59	6.2	high	T4N2M1	Death	17
135	Female	74	8	Moderate	T3N0M0	Alive	50
136	Female	62	9.8	Moderate	T4N1M0	Death	49
137	Female	52	4.9	Moderate	T2N0M0	Alive	50
138	Female	46	9.8	Moderate	T4N0M0	Alive	48
139	Female	31	8.6	high	T3N0M0	Alive	49
140	Male	52	4.1	Moderate	T2N0M0	Alive	48
141	Male	32	1.8	Moderate	T3N1M0	Alive	48
142	Female	67	9.8	Moderate	T3N0M0	Alive	49
143	Female	78	7.4	Moderate	T4N0M1	Alive	48
144	Female	78	7.4	Moderate	T4N2M0	Death	5
145	Male	74	9.2	Moderate	T2N0M0	Alive	49
146	Female	70	5.8	Moderate	T2N0M0	Alive	48
147	Male	80	3.9	Moderate	T3N1M0	Alive	48
148	Male	70	2.7	poor	T3N0M0	Alive	48
149	Female	36	5.2	Moderate	T3N2M1	Alive	48
150	Female	69	4.9	Moderate	T3N0M0	Alive	48
151	Female	78	3.7	high	T4N0M1	Alive	48
152	Female	47	3.7	Moderate	T4aN2aM1b	Death	42
153	Female	75	4.3	Moderate	T4N2M0	Death	21
154	Female	50	6.2	Moderate	T4N0M0	Alive	48
155	Female	81	2.5	poor	T3N1M0	Death	35
156	Male	56	5.3	Moderate	T3N0M0	Alive	48
157	Female	70	6.2	Moderate	T4bN1M0	Alive	48
158	Male	63	4.3	high	T3N0M0	Alive	49
159	Female	52	7.4	Moderate	T3N0M0	Alive	49
160	Female	78	4.9	Moderate	T3N1M0	Alive	47
161	Male	65	6.6	Moderate	T3N1M1	Death	16
162	Female	65	4.9	Moderate	T4N2M1	Alive	47
